# Supplementary material for: Retrospective observational study of characteristics of persons with amputations accessing International Committee of the Red Cross (ICRC) rehabilitation centres in five conflict and postconflict countries
Source: PubMed Central journal article supplement — BMJ Open. 2021 Dec 1;11(12):e049533. doi: 10.1136/bmjopen-2021-049533 (PMC8638157; doi:10.1136/bmjopen-2021-049533), 2021-12-01
Supplement: bmjopen-2021-049533.draft_revisions.pdf [file bmjopen-2021-049533.draft_revisions.pdf]

# BMJ Open

BMJ Open is committed to open peer review. As part of this commitment we make the peer review history of every article we publish publicly available.

When an article is published we post the peer reviewers' comments and the authors' responses online. We also post the versions of the paper that were used during peer review. These are the versions that the peer review comments apply to.

The versions of the paper that follow are the versions that were submitted during the peer review process. They are not the versions of record or the final published versions. They should not be cited or distributed as the published version of this manuscript.

BMJ Open is an open access journal and the full, final, typeset and author-corrected version of record of the manuscript is available on our site with no access controls, subscription charges or pay-per-view fees (<http://bmjopen.bmj.com>).

If you have any questions on BMJ Open's open peer review process please email [info.bmjopen@bmj.com](mailto:info.bmjopen@bmj.com)

# BMJ Open

**Early age at amputation and delayed admission to assistive technology and rehabilitation: a retrospective study from International Committee of the Red Cross (ICRC) rehabilitation centres in five conflict and post-conflict countries**

|                               |                                                                                                                                                                                                                                                                                                                                                                                                                                                                                                                                                                                                                                                                                                                                                  |
|-------------------------------|--------------------------------------------------------------------------------------------------------------------------------------------------------------------------------------------------------------------------------------------------------------------------------------------------------------------------------------------------------------------------------------------------------------------------------------------------------------------------------------------------------------------------------------------------------------------------------------------------------------------------------------------------------------------------------------------------------------------------------------------------|
| Journal:                      | <i>BMJ Open</i>                                                                                                                                                                                                                                                                                                                                                                                                                                                                                                                                                                                                                                                                                                                                  |
| Manuscript ID                 | bmjopen-2021-049533                                                                                                                                                                                                                                                                                                                                                                                                                                                                                                                                                                                                                                                                                                                              |
| Article Type:                 | Original research                                                                                                                                                                                                                                                                                                                                                                                                                                                                                                                                                                                                                                                                                                                                |
| Date Submitted by the Author: | 28-Jan-2021                                                                                                                                                                                                                                                                                                                                                                                                                                                                                                                                                                                                                                                                                                                                      |
| Complete List of Authors:     | Barth, Cornelia; University College Dublin, School of Public Health, Physiotherapy and Sports Science; International Committee of the Red Cross, Health<br>Wladis, Andreas; Linköping University, Department of Biomedical and Clinical Sciences (BKV)<br>Blake, Catherine; University College Dublin, School of Public Health, Physiotherapy and Sports Science<br>Bhandarkar, Prashant; Bhabha Atomic Research Centre, WHO Collaborating Centre (WHOCC) for Research in Surgical Needs in LMICs; Tata Institute of Social Sciences School of Health Systems Studies, Perone, S. ; International Committee of the Red Cross, Health<br>O'Sullivan, Cliona; University College Dublin, School of Public Health, Physiotherapy and Sports Science |
| Keywords:                     | REHABILITATION MEDICINE, TRAUMA MANAGEMENT, DIABETES & ENDOCRINOLOGY, EPIDEMIOLOGY, HEALTH SERVICES ADMINISTRATION & MANAGEMENT, PUBLIC HEALTH                                                                                                                                                                                                                                                                                                                                                                                                                                                                                                                                                                                                   |
|                               |                                                                                                                                                                                                                                                                                                                                                                                                                                                                                                                                                                                                                                                                                                                                                  |

SCHOLARONE™  
Manuscripts

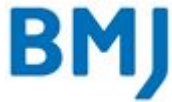

I, the Submitting Author has the right to grant and does grant on behalf of all authors of the Work (as defined in the below author licence), an exclusive licence and/or a non-exclusive licence for contributions from authors who are: i) UK Crown employees; ii) where BMJ has agreed a CC-BY licence shall apply, and/or iii) in accordance with the terms applicable for US Federal Government officers or employees acting as part of their official duties; on a worldwide, perpetual, irrevocable, royalty-free basis to BMJ Publishing Group Ltd ("BMJ") its licensees and where the relevant Journal is co-owned by BMJ to the co-owners of the Journal, to publish the Work in this journal and any other BMJ products and to exploit all rights, as set out in our [licence](#).

The Submitting Author accepts and understands that any supply made under these terms is made by BMJ to the Submitting Author unless you are acting as an employee on behalf of your employer or a postgraduate student of an affiliated institution which is paying any applicable article publishing charge ("APC") for Open Access articles. Where the Submitting Author wishes to make the Work available on an Open Access basis (and intends to pay the relevant APC), the terms of reuse of such Open Access shall be governed by a Creative Commons licence – details of these licences and which [Creative Commons](#) licence will apply to this Work are set out in our licence referred to above.

Other than as permitted in any relevant BMJ Author's Self Archiving Policies, I confirm this Work has not been accepted for publication elsewhere, is not being considered for publication elsewhere and does not duplicate material already published. I confirm all authors consent to publication of this Work and authorise the granting of this licence.

## AUTHORS

Corresponding author

Barth, Cornelia Anne

International Committee of the Red Cross

Health Unit

19, avenue de la Paix

1202 Geneva

Switzerland

e-mail address [c.a.barth@gmx.net](mailto:c.a.barth@gmx.net)

telephone +41 78 645 8919

2<sup>nd</sup> affiliation

University College Dublin, School of Public Health, Physiotherapy and Sports Science

Dublin

Ireland

Co-authors

Wladis, Andreas

Linköping University, Department of Biomedical and Clinical Sciences

Linköping

Sweden

Blake, Catherine

University College Dublin, School of Public Health, Physiotherapy and Sports Science

Dublin

Ireland

Bhandarkar, Prashant

Bhabha Atomic Research Centre, WHO Collaborating Centre (WHOCC) for Research in  
Surgical Needs in LMICs

Mumbai, Maharashtra, 400094

India

2<sup>nd</sup> affiliation

Tata Institute of Social Sciences School of Health Systems Studies,

Deonar, Maharashtra

India

Perone, Sigiriya Aebischer

International Committee of the Red Cross, Health unit,

Geneva

Switzerland

O'Sullivan, Cliona

University College Dublin, School of Public Health, Physiotherapy and Sports Science

Dublin

Ireland

1  
2  
3  
4  
5  
6  
7  
8  
9  
10  
11  
12  
13  
14  
15  
16  
17  
18  
19  
20  
21  
22  
23  
24  
25  
26  
27  
28  
29  
30  
31  
32  
33  
34  
35  
36  
37  
38  
39  
40  
41  
42  
43  
44  
45  
46  
47  
48  
49  
50  
51  
52  
53  
54  
55  
56  
57  
58  
59  
60

KEYWORDS

- Rehabilitation
- Armed Conflicts
- Amputation
- Delivery of Health Care
- Diabetes Complications

WORD COUNT

3901

For peer review only

## TITLE

Early age at amputation and delayed admission to assistive technology and rehabilitation: a retrospective study from International Committee of the Red Cross (ICRC) rehabilitation centres in five conflict and post-conflict countries

## ABSTRACT

## INTRODUCTION

Limb amputation incidence is particularly high in fragile contexts due to conflict, accidents and poorly managed diabetes. The study aim was to analyse demographic and amputation characteristics of persons with amputation (PwA) and time between amputation and rehabilitation in five countries.

## METHODS

Countries with the highest numbers of PwA in the global International Committee of the Red Cross database were selected (Afghanistan, Cambodia, Iraq, Myanmar, Sudan). Data from 2009–2018 were cleaned, merged, and aggregated by sex, age at amputation and registration, environment, cause, combination, anatomical level. We analyzed differences in demographic factors and time to access rehabilitation between users with traumatic and non-traumatic amputation.

## RESULTS

Data for 28446 individuals were included (4329 [15.2%] female). Most were traumatic amputations (73.4%, 20890) and 48.6% (13801) of these conflict related. The average age of men and women with traumatic amputation was 26.9 and 24.1 years respectively; for non-traumatic amputation it was 49.1 years and 45.9 years respectively. Delay between amputation and rehabilitation was on average 8.2 years for those with traumatic amputation and 3 years for those with non-traumatic amputation.

## CONCLUSION

Young age for traumatic and non-traumatic amputations indicates the devastating impact of war and fragile health systems on a society. Long delays between amputation and rehabilitation reveal the mismatch of needs and resources. For rehabilitation service providers in fragile settings, it is an enormous task to manage the diversity of PwA of various causes, age, sex and additional conditions. Improved collaboration between primary healthcare, surgical and rehabilitation services are recommended to ensure comprehensive care for PwA.

## FUNDING

None

### STRENGTHS AND LIMITATIONS OF THIS STUDY

- To our knowledge, this is the first large multicountry study on a highly vulnerable and neglected group of persons with amputations seeking rehabilitation in contexts of conflict and post conflict
- Data originate from exceptionally challenging and diverse settings where providing rehabilitation and collecting data is complex and constantly challenged by the volatility of the environment
- Limitations include that data are derived from ICRC supported structures only and cannot make statements on overall population or on persons not attending services

For peer review only

## INTRODUCTION

Limb amputation is a lifechanging event. Global incidence studies reveal a substantial lack of data from fragile contexts such as conflict affected or low and middle income countries (LMIC), but research has shown that amputation incidence is higher in populations with low economic and educational status resulting in limited access to healthcare, even in high income countries (HIC).<sup>1-3</sup> People in fragile contexts are particularly at risk of amputation and many of them will have to cope without prosthetic care.<sup>4</sup> Appropriate rehabilitation and assistive technology have the potential to greatly diminish disability and allow the person to lead an independent, functional life. This requires the availability of comprehensive, costly and lifelong services, which is particularly challenging in such environments. Rehabilitation services should span from early physiotherapy to prosthetic fitting, psychosocial support and social reintegration measures. A lower extremity amputation (LEA) requires prosthetic renewal every three years, for children every six months.<sup>5</sup>

Veterans from HIC who sustained conflict-related amputations abroad have been studied extensively whereas very little is known about the affected population in the countries themselves.<sup>6-8</sup> Complex traumatic amputations and their sequelae in conflict- and mine-affected areas are known to be a huge challenge.<sup>4,9,10</sup> Adding to this, and with profound consequences, is the increasing global burden of type two diabetes mellitus (T2D).<sup>11</sup> Overstretched health systems, particularly in LMIC, lacking access to basic diabetic care and high rates of undiagnosed T2D increase the risk and incidence of amputations.<sup>12</sup> Road traffic (RTA) and other accidents are an additional problem in countries with limited traffic and occupational safety standards.<sup>13</sup>

Persons with amputations (PwA) constitute the biggest cohort of users accessing rehabilitation services supported by the International Committee of the Red Cross (ICRC) in conflict and post-conflict states.<sup>14</sup> Assisting conflict affected populations is at the centre of the ICRC's humanitarian mission and serving mine victims with limb loss is a core activity since the launch of its physical rehabilitation programme (PRP) in 1979.<sup>15,16</sup> Currently, the ICRC supports 152 rehabilitation structures in 35 countries offering multidisciplinary rehabilitation services for persons with physical disabilities and capacity building for rehabilitation workforce. With this support, 62172 persons worldwide were fitted with prostheses in 2019.<sup>15</sup> There is very little information on the characteristics of PwA accessing rehabilitation in fragile contexts.

The overall aim of this study was to analyse characteristics of PwA accessing rehabilitation services in five ICRC contexts in 2009-2018 to better understand the needs and deduce implications for service provision. Specific aims were to explore differences in sex and age at amputation, at registration for rehabilitation, time between amputation and registration (delay), causes and characteristics of amputations.



## METHODS

This study is a descriptive retrospective analysis of aggregated data. It reflects the records of all PwA registered from 2009 to 2018 in ICRC-supported physical rehabilitation centres (PRCs) in Afghanistan (n=7), Cambodia (n=2), Iraq (n=1), Myanmar (n= 5), and Sudan (n= 2). Data were extracted from an ICRC-developed electronic database described in a previous study.<sup>14</sup> The five countries representing the highest numbers of PwA attending PRCs were selected for this study. Besides post-conflict Cambodia they represent contexts of protracted crises and are classified by the World Bank as low-income (Afghanistan), LMIC (Cambodia, Sudan, Myanmar), or upper middle-income (Iraq).<sup>17</sup>

Data reflect representative user populations in the studied countries to varying degrees depending on presence of other rehabilitation providers, or data management difficulties. All PRCs were located in urban areas.

Participants include all persons with any type of acquired amputation newly attending for prosthetic fitting. Excluded were persons attending with congenital limb loss. Upon registration, demographic and clinical characteristics were captured as part of routine documentation.

The variables retrieved from the database were: country, sex, age at registration and at amputation, environment, cause, anatomic level and number of amputation(s). The origin of the database were handwritten patient files transferred into an electronic system.

Data depended on the accuracy of self-report and recording of observations and assessments by PRC staff with varying professional training and subject to interpretation, hereby presenting potential biases. Variables such as sex and age are deemed robust. Challenges exist when recording the cause of non-traumatic amputation presentations as PRCs are rarely attached to a medical service to diagnose underlying conditions.

The quantitative variables were cleaned, merged, disaggregated by sex and age and organized into variables of interest. Environment referred to PwA's living environment and was subject to local definitions of the terms urban or rural.

The delay between amputation and registration to rehabilitation was calculated by subtracting the self-reported amputation date from the registration date as noted on the user file.

Age at registration was grouped into young child: under 5; child: 5–17; young adult: 18–34; adult: 35–59; older adult: over 60. Besides 'environment' all selected variables were mandatory for data entry. Where software issues led to missing data, these were labelled 'no data' in the tables.

Figure 1 lists the causes as retrieved from the database and shows how causes were categorised into traumatic or non-traumatic. Traumatic causes were further sub-categorised as non-conflict- or conflict-related. We examined non-conflict-related traumatic causes by accidental or non-accidental causes. Conflict-related causes were separated into caused by weapons or by weapon-contamination, which encompasses the presence of mines, explosive remnants of war (ERW) and other sources of contamination.<sup>18</sup>

The database offered four labels for non-traumatic causes: cancer, infection, metabolic, or vascular. For analysis, these were merged, except cancer (merged with 'other'), and considered related to non-communicable diseases (NCD), potentially T2D. For amputation characteristics, PwA were counted by combinations of lower and upper extremity

1  
2  
3 amputations (UAE), by sex and non-traumatic versus traumatic causes. Levels were counted  
4 by number of amputations. We kept six levels of upper extremity amputations (UEA) as per  
5 database and aligned LEA to these, merging knee disarticulation with transcondylar  
6 amputation and hip disarticulation with hemipelvectomy for functional similarity.  
7  
8 Data analysis comprised of descriptive statistics, using Microsoft Office Excel 2016, R  
9 (version 3.6.1), R Studio for windows (version 1.2.5001) and SPSS (IBM SPSS Statistics for  
10 Windows, Version 24.0. Armonk, NY: IBM Corp). Categorical data were summarised as  
11 counts and percentages across rows (sex) and columns (groups). Age at the time of  
12 amputation, registration and delay intervals were presented as means with 95% confidence  
13 intervals. Differences between groups were assessed using chi-square and independent  
14 sample t-tests. P values below 0.05 were considered statistically significant.  
15  
16 The methods used and findings from the study are reported in line with the GATHER  
17 guidelines.<sup>19</sup>

18  
19 Ethical exemption to conduct analysis on de-identified data was granted by the Swiss Ethics  
20 Committee Geneva [Reference number: REQ-2019-00027]. Data sharing agreements  
21 between the ICRC, Linköping University and University College Dublin were approved by  
22 each institution.  
23

24  
25 Patient and public involvement: for this retrospective study of routinely collected data  
26 patient involvement did not apply. The PRC managers and personnel and ICRC Expatriate  
27 staff onsite were regularly informed and involved, when the study was developed.  
28

29 Interpretation of the data was based on their profound understanding of the respective  
30 contexts. Preliminary research results were presented by the main author in an ongoing  
31 process, online and in person during project visits where involved rehabilitation providers  
32 did and will continue to play an active role in research dissemination.  
33

34 Patient and public involvement: for this retrospective study of routinely collected data,  
35 patient involvement in study design did not apply. However, consultation with key  
36 stakeholders (PRC managers and personnel and ICRC expatriate staff) was conducted  
37 regarding study design and feasibility and contextual analysis of findings. Interpretation of  
38 the data was based on these stakeholders' profound understanding of the respective  
39 contexts. The main author presented and discussed preliminary research results in an  
40 ongoing process, online and in person during project visits where involved rehabilitation  
41 providers did and will continue to play an active role in dissemination of the findings of this  
42 research.  
43  
44  
45  
46

## 47 RESULTS

48  
49 A total of 28446 individual user files were analysed with 4329 (15.2%) female PwA. Most  
50 data relate to Afghanistan (12364 [43.5%]), followed by Myanmar (5267 [18.5%]), Sudan  
51 (5012 [17.6%]), Iraq (3491 [12.3%]), and Cambodia (2312 [8.1%]).  
52

53 Average age for traumatic amputation was 26.9 years in male, 24.1 years in female and for  
54 non-traumatic amputation it was 49.1 years in male, 45.9 years in female PwA. Average  
55 delay was significantly shorter in the non-traumatic group with 3 years compared to 8.2  
56 years for those with traumatic amputation, (Table 1).  
57  
58  
59  
60

1  
2  
3 In all countries, delay was lowest in young children (0.0–2.5 years) and highest for males  
4 over 60 with traumatic amputations (16.6–22.5 years), except for Afghanistan (10.5 years for  
5 males aged 35–59 and 10.3 years for those over 60).  
6  
7  
8  
9  
10  
11  
12  
13  
14  
15  
16  
17  
18  
19  
20  
21  
22  
23  
24  
25  
26  
27  
28  
29  
30  
31  
32  
33  
34  
35  
36  
37  
38  
39  
40  
41  
42  
43  
44  
45  
46  
47  
48  
49  
50  
51  
52  
53  
54  
55  
56  
57  
58  
59  
60

For peer review only

**Table 1. Age at time of amputation, age at registration, delay between amputation and registration**

| Country            | Variables                                            | Non-Traumatic Amputation |                      | Traumatic Amputation |                      | Total – by cause     |                      |                   | P value† |
|--------------------|------------------------------------------------------|--------------------------|----------------------|----------------------|----------------------|----------------------|----------------------|-------------------|----------|
|                    |                                                      | Male                     | Female               | Male                 | Female               | Non-Trauma           | Trauma               | MD (95% CI)       |          |
| <b>Total</b>       |                                                      | <b>Mean (95% CI)</b>     | <b>Mean (95% CI)</b> | <b>Mean (95% CI)</b> | <b>Mean (95% CI)</b> | <b>Mean (95% CI)</b> | <b>Mean (95% CI)</b> |                   |          |
|                    | Age at amputation                                    | 49.1(48.6-49.6)          | 45.9(45.1-46.7)      | 26.9(26.7-27.1)      | 24.1(23.3-24.8)      | 48.2(47.8-48.6)      | 26.6(26.4-26.8)      | 21.7(21.3-22.1)   | <0.001   |
|                    | Age at registration                                  | 52.2(51.8-52.7)          | 48.6(47.8-49.4)      | 35.2(35-35.4)        | 31.6(30.9-32.3)      | 51.2(50.8-51.6)      | 34.8(34.6-35)        | 16.4(16.0-16.9)   | <0.001   |
|                    | Delay all users (years)                              | 3.2(3.0-3.4)             | 2.7(2.4-3)           | 8.3(8.1-8.4)         | 7.5(7.1-8)           | 3.0(2.9-3.2)         | 8.2(8-8.3)           | -5.1(-5.4-4.9)    | <0.001   |
|                    | <b>Delay by user age group (age at registration)</b> |                          |                      |                      |                      |                      |                      |                   |          |
|                    | Young child (<5 years)                               | 0.9(0.4-1.4)             | 1.3(0.8-1.8)         | 0.9(0.7-1.1)         | 1.0 (0.7-1.2)        | 1.1(0.7-1.4)         | 0.9(0.8-1.1)         | 0.1(-0.3-0.6)     | 0.528    |
|                    | Child (5-17 years)                                   | 2.2(1.6-2.8)             | 2.2(1.5-2.8)         | 2.0 (1.9-2.2)        | 3.9(3.5-4.3)         | 2.2(1.8-2.6)         | 2.4(2.3-2.6)         | -0.3(-0.7-0.2)    | 0.269    |
|                    | Young Adult (18-34 years)                            | 3.2(2.8-3.6)             | 3.1(2.5-3.7)         | 3.8(3.6-3.9)         | 7.2(6.6-7.8)         | 3.1(2.8-3.5)         | 4.1(3.9-4.2)         | -0.9(-1.3-0.5)    | <0.001   |
|                    | Adult (35-59 years)                                  | 2.9(2.7-3.2)             | 2.6(2.1-3)           | 13.7(13.4-14)        | 9.9(9-10.8)          | 2.8(2.6-3.1)         | 13.3(13.1-13.6)      | -10.5(-10.9-10.1) | <0.001   |
|                    | Older Adult (>60 years)                              | 3.5(3.1-3.9)             | 3(2.3-3.7)           | 16.9(16-17.7)        | 12.1(9.9-14.4)       | 3.4(3.1-3.7)         | 16.3(15.5-17.1)      | -12.9(-13.7-12.2) | <0.001   |
| <b>Afghanistan</b> |                                                      |                          |                      |                      |                      |                      |                      |                   |          |
|                    | Age at amputation                                    | 48.8(46.2-51.4)          | 42.7(39.4-46)        | 24.8(24.3-25.3)      | 20.6(19.4-21.8)      | 46.8(44.8-48.9)      | 24.3(23.9-24.8)      | 22.5(21.7-23.2)   | <0.001   |
|                    | Age at registration                                  | 50.3(49.2-51.3)          | 44.0 (42.5-45.4)     | 29.7(29.4-30)        | 26.6(25.6-27.6)      | 48.3(47.4-49.1)      | 29.4(29.1-29.7)      | 18.9(18.1-19.6)   | <0.001   |
|                    | Delay all users (years)                              | 1.6(1.3-1.9)             | 1.3(1.0-1.6)         | 4.9(4.8-5.1)         | 6.0 (5.5-6.6)        | 1.5(1.2-1.7)         | 5.0 (4.9-5.2)        | -3.6(-4.0-3.2)    | <0.001   |
|                    | <b>Delay by user age group (age at registration)</b> |                          |                      |                      |                      |                      |                      |                   |          |
|                    | Young child (<5 years)                               | 0.5(-0.2-1.2)            | 1.3(0.3-2.2)         | 0.9(0.6-1.1)         | 0.9(0.6-1.2)         | 0.8(0.2-1.3)         | 0.9(0.7-1.1)         | -0.1(-0.8-0.5)    | 0.688    |
|                    | Child (5-17 years)                                   | 1.1(0.6-1.7)             | 1.6(0.8-2.4)         | 1.8(1.6-2.0)         | 3.9(3.4-4.4)         | 1.3(0.9-1.8)         | 2.2(2.1-2.4)         | -0.9(-1.5-0.3)    | 0.003    |
|                    | Young Adult (18-34 years)                            | 3.0(2.2-3.8)             | 2.1(1.2-2.9)         | 3.1(2.9-3.2)         | 7.8(6.9-8.7)         | 2.7(2.0-3.3)         | 3.4(3.2-3.5)         | -0.7(-1.4-0.1)    | 0.035    |
|                    | Adult (35-59 years)                                  | 1.4(0.9-1.9)             | 1(0.6-1.4)           | 10.5(10.0-11.0)      | 7.6(6.2-9.0)         | 1.2(0.9-1.6)         | 10.1(9.7-10.6)       | -8.9(-9.8-8.0)    | <0.001   |
|                    | Older Adult (>60 years)                              | 1.3(0.7-1.8)             | 1.1(0.3-1.9)         | 10.3(9.1-11.6)       | 4.6(2.3-6.8)         | 1.2(0.8-1.7)         | 9.7(8.5-10.9)        | -8.5(-9.6-7.4)    | <0.001   |
| <b>Cambodia</b>    |                                                      |                          |                      |                      |                      |                      |                      |                   |          |
|                    | Age at amputation                                    | 46(38.5-53.6)            | 41.6(31.1-52.0)      | 28.6(27.2-29.9)      | 31.3(27.3-35.3)      | 44.7(38.6-50.8)      | 28.9(27.6-30.2)      | 15.8(13.7-17.9)   | <0.001   |
|                    | Age at registration                                  | 48.9(45.9-51.9)          | 45.3(40.3-50.3)      | 42.7(42.0-43.3)      | 40.3(38-42.7)        | 47.8(45.2-50.4)      | 42.4(41.8-43.0)      | 5.4(3.2-7.6)      | <0.001   |
|                    | Delay all users (years)                              | 2.9(1.8-4.0)             | 3.8(1.5-6.1)         | 14.0 (13.4-14.6)     | 9.3(7.8-10.8)        | 3.2(2.2-4.2)         | 13.4(12.9-14.0)      | -10.2(-12.0-8.5)  | <0.001   |
|                    | <b>Delay by user age group (age at registration)</b> |                          |                      |                      |                      |                      |                      |                   |          |
|                    | Young child (<5 years)                               | 2.5(1.5-3.5)##           | ..                   | 1.0 (0.2-1.8)        | 0.0(0.0-0.0)##       | 2.5(1.5-3.5)         | 0.7(0.0-1.3)         | 1.8(0.2-3.4)      | 0.031    |
|                    | Child (5-17 years)                                   | 9.5(-5.2-24.2)           | 4.6(0.4-8.7)         | 3.1(1.7-4.4)         | 3.7(1.3-6.2)         | 5.7(1.4-9.9)         | 3.2(2.1-4.4)         | 2.4(-1.2-6.0)     | 0.180    |
|                    | Young Adult (18-34 years)                            | 4.3(2.0-6.6)             | 3.9(-0.1-7.8)        | 4.7(4.1-5.3)         | 6.2(4.2-8.1)         | 4.2(2.2-6.1)         | 4.9(4.3-5.5)         | -0.7(-2.9-1.5)    | 0.520    |
|                    | Adult (35-59 years)                                  | 3.2(1.2-5.1)             | 3.1(0.4-5.8)         | 18.6(17.9-19.3)      | 10.9(8.7-13.2)       | 3.1(1.5-4.8)         | 17.9(17.2-18.5)      | -14.7(-17.2-12.2) | <0.001   |
|                    | Older Adult (>60 years)                              | 1.2(0.0-3.2)             | 4.3(-1.9-10.6)       | 19.7(17.7-21.7)      | 15.2(9.9-20.5)       | 2.1(0.1-4.1)         | 18.9(17-20.8)        | -16.8(-20.5-13.1) | <0.001   |
| <b>Iraq</b>        |                                                      |                          |                      |                      |                      |                      |                      |                   |          |
|                    | Age at amputation                                    | 54.4(50.7-58.2)          | 53.9(48-59.9)        | 26.8(25.7-28.0)      | 25.6(22.2-29.0)      | 54.3(51.2-57.5)      | 26.7(25.6-27.8)      | 27.6(26.6-28.6)   | <0.001   |
|                    | Age at registration                                  | 56.6(55.7-57.6)          | 55.3(53.5-57.1)      | 39.1(38.5-39.8)      | 33.6(31.3-35.8)      | 56.3(55.4-57.1)      | 38.6(38-39.2)        | 17.7(16.6-18.7)   | <0.001   |
|                    | Delay all users (years)                              | 2.2(1.8-2.7)             | 1.7(1-2.3)           | 12.3(11.8-12.8)      | 8.1(6.7-9.6)         | 2.1(1.7-2.4)         | 11.9(11.5-12.4)      | -9.9(-10.6-9.1)   | <0.001   |
|                    | <b>Delay by user age group (age at registration)</b> |                          |                      |                      |                      |                      |                      |                   |          |
|                    | Young child (<5 years)                               | 0.0(0.0-0.0)#            | 2.0(2.0-2.0)##       | 1.0 (0.4-1.6)        | 1.0(0.1-1.9)         | 1.0(-1.0-3.0)        | 1.0(0.5-1.5)         | 0(-1.7-1.7)       | 1.000    |
|                    | Child (5-17 years)                                   | 4.1(1.2-7.1)             | 2.1(0-4.2)           | 2.9(2.2-3.5)         | 2.6(1.4-3.8)         | 3.1(1.3-5.0)         | 2.8(2.2-3.4)         | 0.3(-1.3-1.9)     | 0.669    |
|                    | Young Adult (18-34 years)                            | 3.8(1.8-5.7)             | 1.3(0.2-2.3)         | 5.7(5.2-6.2)         | 7.6(5.5-9.7)         | 3.0(1.6-4.4)         | 5.9(5.4-6.3)         | -2.8(-4.7-1.0)    | 0.002    |
|                    | Adult (35-59 years)                                  | 2.0(1.5-2.6)             | 1.4(0.7-2.1)         | 16.7(16-17.4)        | 11.0(8.1-13.9)       | 1.9(1.4-2.3)         | 16.3(15.6-17.0)      | -14.4(-15.5-13.3) | <0.001   |
|                    | Older Adult (>60 years)                              | 2.2(1.5-2.8)             | 1.9(0.8-3.0)         | 21.2(19.1-23.2)      | 10.9(5.2-16.5)       | 2.1(1.6-2.7)         | 20.4(18.4-22.4)      | -18.3(-19.8-16.8) | <0.001   |
| <b>Myanmar</b>     |                                                      |                          |                      |                      |                      |                      |                      |                   |          |
|                    | Age at amputation                                    | 46.7(43.7-49.8)          | 47.4(42.2-52.7)      | 29.6(28.6-30.5)      | 28.0 (25-31.1)       | 46.9(44.3-49.5)      | 29.4(28.5-30.3)      | 17.5(16.6-18.3)   | <0.001   |
|                    | Age at registration                                  | 52.0(51.0-52.9)          | 51.8(50-53.6)        | 40.7(40.3-41.2)      | 38.3(36.6-40)        | 51.9(51.1-52.8)      | 40.5(40.1-40.9)      | 11.4(10.5-12.3)   | <0.001   |

|              |                                                      |                           |                           |                             |                              |                 |                 |                   |        |
|--------------|------------------------------------------------------|---------------------------|---------------------------|-----------------------------|------------------------------|-----------------|-----------------|-------------------|--------|
|              | Delay all users (years)                              | 5.3(4.8-5.8)              | 4.3(3.4-5.3)              | 11.2(10.8-11.5)             | 10.3(9.0-11.6)               | 5.0 (4.6-5.5)   | 11.1(10.8-11.5) | -6.1(-6.7-5.4)    | <0.001 |
|              | <b>Delay by user age group (age at registration)</b> |                           |                           |                             |                              |                 |                 |                   |        |
|              | Young child (<5 years)                               | 1.0(1.0-1.0) <sup>†</sup> | 2.0(2.0-2.0) <sup>†</sup> | 2.0 (2.0-2.0) <sup>##</sup> | 2.5(1.0.5-3.5) <sup>##</sup> | 1.5(0.5-2.5)    | 2.3(1.8-2.7)    | -0.8(-2.1-0.6)    | 0.196  |
|              | Child (5-17 years)                                   | 4.5(2.3-6.7)              | 5.6(3.0-8.2)              | 2.4(1.8-3.1)                | 3.9(2.5-5.3)                 | 5.1(3.4-6.9)    | 2.8(2.2-3.4)    | 2.3(0.8-3.8)      | 0.003  |
|              | Young Adult (18-34 years)                            | 2.6(2.0-3.2)              | 2.5(0.9-4.0)              | 4.5(4.2-4.8)                | 6.1(4.6-7.5)                 | 2.6(2-3.2.0)    | 4.6(4.3-4.9)    | -2(-3.0-1.1)      | <0.001 |
|              | Adult (35-59 years)                                  | 4.7(4.1-5.3)              | 4.3(2.9-5.6)              | 13.9(13.5-14.4)             | 13.1(11.0-15.1)              | 4.6(4.0-5.2)    | 13.9(13.4-14.3) | -9.3(-10.2-8.4)   | <0.001 |
|              | Older Adult (>60 years)                              | 7.3(6.0-8.5)              | 4.8(2.8-6.8)              | 22.5(20.9-24.1)             | 19.3(13.2-25.3)              | 6.7(5.6-7.7)    | 22.2(20.7-23.8) | -15.6(-17.4-13.7) | <0.001 |
| <b>Sudan</b> |                                                      |                           |                           |                             |                              |                 |                 |                   |        |
|              | Age at amputation                                    | 48.5(46.5-50.5)           | 45(41.8-48.2)             | 30.5(29.1-32)               | 25.9(23.1-28.6)              | 47.6(45.9-49.3) | 29.7(28.4-31.1) | 17.9(16.9-18.9)   | <0.001 |
|              | Age at registration                                  | 52.1(51.4-52.7)           | 48.7(47.4-50)             | 39.7(38.9-40.5)             | 34(32.2-35.9)                | 51.2(50.6-51.8) | 38.7(38.0-39.5) | 12.5(11.5-13.4)   | <0.001 |
|              | Delay all users (years)                              | 3.6(3.3-4.0)              | 3.7(3.1-4.3)              | 9.2(8.7-9.8)                | 8.2(7.1-9.3)                 | 3.6(3.3-3.9)    | 9.1(8.6-9.6)    | -5.4(-6.0-4.9)    | <0.001 |
|              | <b>Delay by user age group (age at registration)</b> |                           |                           |                             |                              |                 |                 |                   |        |
|              | Young child (<5 years)                               | 1.0(0.5-1.5)              | 1.2(0.4-2.0)              | 0.8(0.2-1.5)                | 1.3(0.4-2.3)                 | 1.1(0.6-1.5)    | 1.0 (0.5-1.5)   | 0.1(-0.7-0.9)     | 0.833  |
|              | Child (5-17 years)                                   | 2.7(1.6-3.7)              | 1.1(0.6-1.7)              | 2.9(2.2-3.6)                | 4.6(3.5-5.7)                 | 2.1(1.4-2.8)    | 3.4(2.8-4)      | -1.4(-2.3-0.4)    | 0.006  |
|              | Young Adult (18-34 years)                            | 3.3(2.7-3.9)              | 4.3(3.2-5.4)              | 5.2(4.7-5.7)                | 6.9(5.6-8.2)                 | 3.6(3.0-4.1)    | 5.6(5.1-6)      | -2(-2.7-1.3)      | <0.001 |
|              | Adult (35-59 years)                                  | 3.1(2.7-3.5)              | 3.4(2.7-4.2)              | 11.3(10.5-12.2)             | 9.6(7.4-11.9)                | 3.2(2.8-3.6)    | 11.1(10.3-11.9) | -7.9(-8.7-7.1)    | <0.001 |
|              | Older Adult (>60 years)                              | 4.4(3.7-5.2)              | 4.1(2.8-5.4)              | 16.6(14.1-19.1)             | 15.1(9.3-20.9)               | 4.4(3.7-5)      | 16.4(14.1-18.7) | -12(-13.8-10.3)   | <0.001 |

Values are mean with 95% Confidence Interval (Mean (95% CI)). MD = Mean Difference between non-traumatic and non-traumatic values.

† Independent sample t-test between participants with non-traumatic and traumatic amputation.

# 1 participant; ## 2 participants

review only

**Table 2. Distribution by sex and age of persons presenting with traumatic and non-traumatic amputations**

| Country            | Age Group                 | Non-Traumatic Amputation |                      | Traumatic Amputation  |                      | Ratio<br>traumatic:1<br>non-traumatic<br>amputation | P<br>value† | Total                 |                      | Grand<br>Total |
|--------------------|---------------------------|--------------------------|----------------------|-----------------------|----------------------|-----------------------------------------------------|-------------|-----------------------|----------------------|----------------|
|                    |                           | Male<br>N(R% C%)         | Female<br>N(R% C%)   | Male<br>N(R% C%)      | Female<br>N(R% C%)   |                                                     |             | Male<br>N(R% C%)      | Female<br>N(R% C%)   |                |
| <b>Overall</b>     | <b>Total</b>              | <b>5481(72.5 ..)</b>     | <b>2075(27.5 ..)</b> | <b>18636(89.2 ..)</b> | <b>2254(10.8 ..)</b> | 2.76                                                | <0.001      | <b>24117(84.8 ..)</b> | <b>4329(15.2 ..)</b> | <b>28446</b>   |
|                    | Young Child (<5 years)    | 19(57.6 0.3)             | 14(42.4 0.7)         | 99(58.9 0.5)          | 69(41.1 3.1)         | 5.09                                                | 0.885       | 118(58.7 0.5)         | 83(41.3 1.9)         | 201(0.7)       |
|                    | Child (5-17 years)        | 168(54.2 3.1)            | 142(45.8 6.8)        | 1748(77.8 9.4)        | 500(22.2 22.2)       | 7.25                                                | <0.001      | 1916(74.9 7.9)        | 642(25.1 14.8)       | 2558(9.0)      |
|                    | Young Adult (18-34 years) | 753(70.6 13.7)           | 314(29.4 15.1)       | 8373(91.3 44.9)       | 799(8.7 35.4)        | 8.60                                                | <0.001      | 9126(89.1 37.8)       | 1113(10.9 25.7)      | 10239(36)      |
|                    | Adult (35-59 years)       | 2433(72.0 44.4)          | 948(28.0 45.7)       | 7047(90.8 37.8)       | 711(9.2 31.5)        | 2.29                                                | <0.001      | 9480(85.1 39.3)       | 1659(14.9 38.3)      | 11139(39.2)    |
|                    | Older Adult (>60 years)   | 2108(76.2 38.5)          | 657(23.8 31.7)       | 1369(88.7 7.3)        | 175(11.3 7.8)        | 0.56                                                | <0.001      | 3477(80.7 14.4)       | 832(19.3 19.2)       | 4309(15.1)     |
| <b>Afghanistan</b> | <b>Total</b>              | <b>1344(67.8 ..)</b>     | <b>638(32.2 ..)</b>  | <b>9261(89.2 ..)</b>  | <b>1121(10.8 ..)</b> | 8.50                                                | <0.001      | <b>10605(85.8 ..)</b> | <b>1759(14.2 ..)</b> | <b>12364</b>   |
|                    | Young Child (<5 years)    | 9(64.3 0.7)              | 5(35.7 0.8)          | 67(56.3 0.7)          | 52(43.7 4.6)         | 10.82                                               | 0.568       | 76(57.1 0.7)          | 57(42.9 3.2)         | 133(1.1)       |
|                    | Child (5-17 years)        | 88(55.7 6.5)             | 70(44.3 11.0)        | 1356(79.3 14.6)       | 354(20.7 31.6)       | 16.43                                               | <0.001      | 1444(77.3 13.6)       | 424(22.7 24.1)       | 1868(15.1)     |
|                    | Young Adult (18-34 years) | 226(65.9 16.8)           | 117(34.1 18.3)       | 5239(93.0 56.6)       | 395(7.0 35.2)        | 3.18                                                | <0.001      | 5465(91.4 51.5)       | 512(8.6 29.1)        | 5977(48.3)     |
|                    | Adult (35-59 years)       | 468(62.0 34.8)           | 287(38.0 45)         | 2139(89.0 23.1)       | 265(11.0 23.6)       | 0.72                                                | <0.001      | 2607(82.5 24.6)       | 552(17.5 31.4)       | 3159(25.5)     |
|                    | Older Adult (>60 years)   | 553(77.7 41.1)           | 159(22.3 24.9)       | 460(89.3 5)           | 55(10.7 4.9)         | 10.39                                               | <0.001      | 1013(82.6 9.6)        | 214(17.4 12.2)       | 1227(9.9)      |
| <b>Cambodia</b>    | <b>Total</b>              | <b>142(70.0 ..)</b>      | <b>61(30.0 ..)</b>   | <b>1861(88.2 ..)</b>  | <b>248(11.8 ..)</b>  | 7.60                                                | <0.001      | <b>2003(86.6 ..)</b>  | <b>309(13.4 ..)</b>  | <b>2312</b>    |
|                    | Young Child (<5 years)    | 2(100 1.4)               | ..                   | 4(66.7 0.2)           | 2(33.3 0.8)          | 12.41                                               | 0.346       | 6(75.0 0.3)           | 2(25.0 0.6)          | 8(0.3)         |
|                    | Child (5-17 years)        | 3(30.0 2.1)              | 7(70.0 11.5)         | 53(69.7 2.8)          | 23(30.3 9.3)         | 14.82                                               | 0.013       | 56(65.1 2.8)          | 30(34.9 9.7)         | 86(3.7)        |
|                    | Young Adult (18-34 years) | 36(70.6 25.4)            | 15(29.4 24.6)        | 551(87.0 29.6)        | 82(13.0 33.1)        | 3.66                                                | 0.001       | 587(85.8 29.3)        | 97(14.2 31.4)        | 684(29.6)      |
|                    | Adult (35-59 years)       | 58(73.4 40.8)            | 21(26.6 34.4)        | 1069(91.3 57.4)       | 102(8.7 41.1)        | 2.05                                                | <0.001      | 1127(90.2 56.3)       | 123(9.8 39.8)        | 1250(54.1)     |
|                    | Older Adult (>60 years)   | 43(70.5 30.3)            | 18(29.5 29.5)        | 184(82.5 9.9)         | 39(17.5 15.7)        | 6.33                                                | 0.038       | 227(79.9 11.3)        | 57(20.1 18.4)        | 284(12.3)      |
| <b>Iraq</b>        | <b>Total</b>              | <b>829(72.4 ..)</b>      | <b>316(27.6 ..)</b>  | <b>2127(90.7 ..)</b>  | <b>219(9.3 ..)</b>   | 13.24                                               | <0.001      | <b>2956(84.7 ..)</b>  | <b>535(15.3 ..)</b>  | <b>3491</b>    |
|                    | Young Child (<5 years)    | 1(33.3 0.1)              | 2(66.7 0.6)          | 12(63.2 0.6)          | 7(36.8 3.2)          | 2.22                                                | 0.329       | 13(59.1 0.4)          | 9(40.9 1.7)          | 22(0.6)        |
|                    | Child (5-17 years)        | 14(50.0 1.7)             | 14(50.0 4.4)         | 122(77.7 5.7)         | 35(22.3 16.0)        | 0.38                                                | 0.002       | 136(73.5 4.6)         | 49(26.5 9.2)         | 185(5.3)       |
|                    | Young Adult (18-34 years) | 43(68.3 5.2)             | 20(31.7 6.3)         | 756(90.6 35.5)        | 78(9.4 35.6)         | 3.32                                                | <0.001      | 799(89.1 27.0)        | 98(10.9 18.3)        | 897(25.7)      |
|                    | Adult (35-59 years)       | 376(74.0 45.4)           | 132(26.0 41.8)       | 1043(92.5 49.0)       | 84(7.5 38.4)         | 2.00                                                | <0.001      | 1419(86.8 48.0)       | 216(13.2 40.4)       | 1635(46.8)     |
|                    | Older Adult (>60 years)   | 395(72.7 47.6)           | 148(27.3 46.8)       | 194(92.8 9.1)         | 15(7.2 6.8)          | 4.34                                                | <0.001      | 589(78.3 19.9)        | 163(21.7 30.5)       | 752(21.5)      |
| <b>Myanmar</b>     | <b>Total</b>              | <b>908(74.5 ..)</b>      | <b>311(25.5 ..)</b>  | <b>3726(92.0 ..)</b>  | <b>322(8.0 ..)</b>   | 3.41                                                | <0.001      | <b>4634(88.0 ..)</b>  | <b>633(12.0 ..)</b>  | <b>5267</b>    |
|                    | Young Child (<5 years)    | 1(50.0 0.1)              | 1(50.0 0.3)          | 2(50.0 0.1)           | 2(50.0 0.6)          | 0.84                                                | 1.000       | 3(50.0 0.1)           | 3(50.0 0.5)          | 6(0.1)         |
|                    | Child (5-17 years)        | 12(41.4 1.3)             | 17(58.6 5.5)         | 93(73.8 2.5)          | 33(26.2 10.2)        | 0.67                                                | 0.001       | 105(67.7 2.3)         | 50(32.3 7.9)         | 155(2.9)       |
|                    | Young Adult (18-34 years) | 111(81.0 12.2)           | 26(19.0 8.4)         | 1249(92.0 33.5)       | 109(8.0 33.9)        | 1.67                                                | <0.001      | 1360(91.0 29.3)       | 135(9 21.3)          | 1495(28.4)     |
|                    | Adult (35-59 years)       | 484(74.0 53.3)           | 170(26.0 54.7)       | 2081(93.4 55.9)       | 147(6.6 45.7)        | 2.11                                                | <0.001      | 2565(89.0 55.4)       | 317(11.0 50.1)       | 2882(54.7)     |
|                    | Older Adult (>60 years)   | 300(75.6 33)             | 97(24.4 31.2)        | 301(90.7 8.1)         | 31(9.3 9.6)          | 1.51                                                | <0.001      | 601(82.4 13)          | 128(17.6 20.2)       | 729(13.8)      |
| <b>Sudan</b>       | <b>Total</b>              | <b>2258(75.1 ..)</b>     | <b>749(24.9 ..)</b>  | <b>1661(82.8 ..)</b>  | <b>344(17.2 ..)</b>  | 0.25                                                | <0.001      | <b>3919(78.2 ..)</b>  | <b>1093(21.8 ..)</b> | <b>5012</b>    |
|                    | Young Child (<5 years)    | 6(50.0 0.3)              | 6(50.0 0.8)          | 14(70.0 0.8)          | 6(30.0 1.7)          | 2.76                                                | 0.258       | 20(62.5 0.5)          | 12(37.5 1.1)         | 32(0.6)        |
|                    | Child (5-17 years)        | 51(60.0 2.3)             | 34(40.0 4.5)         | 124(69.3 7.5)         | 55(30.7 16)          | 5.09                                                | 0.136       | 175(66.3 4.5)         | 89(33.7 8.1)         | 264(5.3)       |
|                    | Young Adult (18-34 years) | 337(71.2 14.9)           | 136(28.8 18.2)       | 578(81.1 34.8)        | 135(18.9 39.2)       | 7.25                                                | <0.001      | 915(77.2 23.3)        | 271(22.8 24.8)       | 1186(23.7)     |
|                    | Adult (35-59 years)       | 1047(75.6 46.4)          | 338(24.4 45.1)       | 715(86.4 43)          | 113(13.6 32.8)       | 8.60                                                | <0.001      | 1762(79.6 45)         | 451(20.4 41.3)       | 2213(44.2)     |
|                    | Older Adult (>60 years)   | 817(77.7 36.2)           | 235(22.3 31.4)       | 230(86.8 13.8)        | 35(13.2 10.2)        | 2.29                                                | 0.001       | 1047(79.5 26.7)       | 270(20.5 24.7)       | 1317(26.3)     |

Values are number of participants (row % | column %). Row% relates to sex distribution. Column% relates to age distribution.

† Chi Square tests between participants by sex and cause (non-traumatic/ traumatic amputation).

1  
2  
3 Table 2 shows that children under 18 attending were represented in low proportions  
4 (between 3 and 5.9%) in all countries except Afghanistan (2001 [16.2%] of 12364). Sudan  
5 had the highest proportion of PwA attending in ages over 60 (1317 [26.3%] of 5012).  
6 Most males entering rehabilitation were of working age (18–59 years) with 2677 (68.3%) of  
7 3919 in Sudan, 2218 (75.0%) of 2956 in Iraq, 8072 (76.1%) of 10605 in Afghanistan, 3925  
8 (84.7%) of 4634 in Myanmar, and 1714 (85.6%) of 2003 in Cambodia.  
9  
10 Among women, the working age group (18–59 years) constituted 314 (58.7%) of 535 in Iraq,  
11 1064 (60.5%) of 1759 in Afghanistan, 722 (66.1%) of 1093 in Sudan, 220 (71.2%) of 309 in  
12 Cambodia, and 452 (71.4%) of 633 in Myanmar. The proportion of males accessing  
13 rehabilitation was higher in all age groups except children under five in Myanmar (3 [50.0%]  
14 of 6). Even in older age groups (>60 years) there was a significant male versus female  
15 majority (3477 [80.7%] of 4309) across all countries, relating to traumatic and non-traumatic  
16 causes. The majority of users with non-traumatic amputation were aged under 60 years,  
17 3373 (61.5%) of 5481 male and 1418 (68.3%) of 2075 female PwA.  
18  
19 Most PwA reportedly came from rural environment (17202 [60.5%] of 28446; 1996 [7%]  
20 unspecified). There was a significantly higher proportion of women (1742 [18.8%] of 9248) in  
21 the urban compared to the rural population, (2308 [13.4%] of 17202;  $p < 0.01$ ).  
22  
23 Figure 1 illustrates how the registered causes of amputation were categorized. Most  
24 amputations were of traumatic origin, 20890 [73.4%] of 28466 (table 3).  
25  
26  
27  
28  
29  
30  
31  
32  
33  
34  
35  
36  
37  
38  
39  
40  
41  
42  
43  
44  
45  
46  
47  
48  
49  
50  
51  
52  
53  
54  
55  
56  
57  
58  
59  
60

**Table 3. Distribution of Amputation Causes by Categories and in Detail, by Country<sup>1</sup>**

|                                 |                                      | All countries   |                  |                 | Afghanistan     |                 |                 | Cambodia        |                 |                 |
|---------------------------------|--------------------------------------|-----------------|------------------|-----------------|-----------------|-----------------|-----------------|-----------------|-----------------|-----------------|
|                                 |                                      | Total N         | Male N(R% C%)    | Female N(R% C%) | Total N(C%)     | Male N(R% C%)   | Female N(R% C%) | Total N(C%)     | Male N(R% C%)   | Female N(R% C%) |
| <b>Total</b>                    |                                      | 28446           | 24117(84.8 ..)   | 4329(15.2 ..)   | 12364(..)       | 10605(85.8 ..)  | 1759(14.2 ..)   | 2312(..)        | 2003(86.6 ..)   | 309(13.4 ..)    |
| Non-trauma                      |                                      | 7556            | 5481(72.5 22.7)  | 2075(27.5 47.9) | 1982(16.0)      | 1344(67.8 12.7) | 638(32.2 36.3)  | 203(8.8)        | 142(70.0 7.1)   | 61(30.0 19.7)   |
| Trauma                          |                                      | 20890           | 18636(89.2 77.3) | 2254(10.8 52.1) | 10382(84.0)     | 9261(89.2 87.3) | 1121(10.8 63.7) | 2109(91.2)      | 1861(88.2 92.9) | 248(11.8 80.3)  |
| <b>Causes by Sub-Categories</b> |                                      |                 |                  |                 |                 |                 |                 |                 |                 |                 |
| Non-trauma NCD/T2D              |                                      | 6999            | 5114(73.1 21.2)  | 1885(26.9 43.5) | 1750(14.2)      | 1190(68.0 11.2) | 560(32.0 31.8)  | 192(8.3)        | 134(69.8 6.7)   | 58(30.2 18.8)   |
| Non-trauma Other                |                                      | 557             | 367(65.9 1.5)    | 190(34.1 4.4)   | 232(1.9)        | 154(66.4 1.5)   | 78(33.6 4.4)    | 11(0.5)         | 8(72.7 0.4)     | 3(27.3 1)       |
| Trauma                          | Trauma Non-conflict Non-accident     | 1164            | 930(79.9 3.9)    | 234(20.1 5.4)   | 332(2.7)        | 255(76.8 2.4)   | 77(23.2 4.4)    | 320(13.8)       | 275(85.9 13.7)  | 45(14.1 14.6)   |
|                                 | Trauma Non-conflict Accident         | 5925            | 5015(84.6 20.8)  | 910(15.4 21)    | 2245(18.2)      | 1872(83.4 17.7) | 373(16.6 21.2)  | 501(21.7)       | 423(84.4 21.1)  | 78(15.6 25.2)   |
|                                 | Trauma Conflict Weapon               | 4482            | 3872(86.4 16.1)  | 610(13.6 14.1)  | 2658(21.5)      | 2261(85.1 21.3) | 397(14.9 22.6)  | 87(3.8)         | 62(71.3 3.1)    | 25(28.7 8.1)    |
|                                 | Trauma Conflict Weapon contamination | 9319            | 8819(94.6 36.6)  | 500(5.4 11.6)   | 5147(41.6)      | 4873(94.7 46.0) | 274(5.3 15.6)   | 1201(51.9)      | 1101(91.7 55)   | 100(8.3 32.4)   |
| <b>Causes in Detail</b>         |                                      |                 |                  |                 |                 |                 |                 |                 |                 |                 |
| Non-trauma                      | Infectious                           | 3661            | 2618(71.5 10.9)  | 1043(28.5 24.1) | 1205(9.7)       | 821(68.1 7.7)   | 384(31.9 21.8)  | 161(7)          | 117(72.7 5.8)   | 44(27.3 14.2)   |
|                                 | Metabolic                            | 148             | 115(77.7 0.5)    | 33(22.3 0.8)    | 137(1.1)        | 110(80.3 1.0)   | 27(19.7 1.5)    | ..              | ..              | ..              |
|                                 | Vascular                             | 3190            | 2381(74.6 9.9)   | 809(25.4 18.7)  | 408(3.3)        | 259(63.5 2.4)   | 149(36.5 8.5)   | 31(1.3)         | 17(54.8 0.8)    | 14(45.2 4.5)    |
|                                 | Cancerous                            | 511             | 344(67.3 1.4)    | 167(32.7 3.9)   | 204(1.6)        | 144(70.6 1.4)   | 60(29.4 3.4)    | 1(0.0)          | 1(100 0)        | ..              |
|                                 | Other – Non-Trauma                   | 46              | 23(50.0 0.1)     | 23(50.0 0.5)    | 28(0.2)         | 10(35.7 0.1)    | 18(64.3 1)      | 10(0.4)         | 7(70.0 0.3)     | 3(30.0 1.0)     |
| Trauma                          | Animal bite                          | 203             | 156(76.8 0.6)    | 47(23.2 1.1)    | 15(0.1)         | 14(93.3 0.1)    | 1(6.7 0.1)      | 16(0.7)         | 11(68.8 0.5)    | 5(31.3 1.6)     |
|                                 | Crime                                | 5               | 5(100 0)         | ..              | 3(0)            | 3(100 0)        | ..              | ..              | ..              | ..              |
|                                 | Frost bite                           | 48              | 46(95.8 0.2)     | 2(4.2 0)        | 37(0.3)         | 35(94.6 0.3)    | 2(5.4 0.1)      | ..              | ..              | ..              |
|                                 | Other – Trauma                       | 908             | 723(79.6 3.0)    | 185(20.4 4.3)   | 277(2.2)        | 203(73.3 1.9)   | 74(26.7 4.2)    | 304(13.1)       | 264(86.8 13.2)  | 40(13.2 12.9)   |
|                                 | Domestic accident                    | 1388            | 1019(73.4 4.2)   | 369(26.6 8.5)   | 825(6.7)        | 557(67.5 5.3)   | 268(32.5 15.2)  | 52(2.2)         | 45(86.5 2.2)    | 7(13.5 2.3)     |
|                                 | Occupational accident                | 1191            | 1096(92.0 4.5)   | 95(8.0 2.2)     | 379(3.1)        | 363(95.8 3.4)   | 16(4.2 0.9)     | 93(4)           | 79(84.9 3.9)    | 14(15.1 4.5)    |
|                                 | Railway accident                     | 227             | 183(80.6 0.8)    | 44(19.4 1.0)    | 10(0.1)         | 9(90.0 0.1)     | 1(10.0 0.1)     | 3(0.1)          | 2(66.7 0.1)     | 1(33.3 0.3)     |
|                                 | RTA                                  | 3044            | 2648(87.0 11.0)  | 396(13.0 9.1)   | 1024(8.3)       | 936(91.4 8.8)   | 88(8.6 5.0)     | 349(15.1)       | 294(84.2 14.7)  | 55(15.8 17.8)   |
|                                 | Sport accident                       | 75              | 69(92.0 0.3)     | 6(8.0 0.1)      | 7(0.1)          | 7(100 0.1)      | ..              | 4(0.2)          | 3(75.0 0.1)     | 1(25.0 0.3)     |
|                                 | Blast injury                         | 2319            | 1980(85.4 8.2)   | 339(14.6 7.8)   | 1383(11.2)      | 1131(81.8 10.7) | 252(18.2 14.3)  | 15(0.6)         | 11(73.3 0.5)    | 4(26.7 1.3)     |
|                                 | GSW                                  | 1834            | 1628(88.8 6.8)   | 206(11.2 4.8)   | 1157(9.4)       | 1037(89.6 9.8)  | 120(10.4 6.8)   | 28(1.2)         | 23(82.1 1.1)    | 5(17.9 1.6)     |
|                                 | Other – Conflict                     | 273             | 218(79.9 0.9)    | 55(20.1 1.3)    | 88(0.7)         | 68(77.3 0.6)    | 20(22.7 1.1)    | 25(1.1)         | 12(48.0 0.6)    | 13(52.0 4.2)    |
|                                 | No data*                             | 56              | 46(82.1 0.2)     | 10(17.9 0.2)    | 30(0.2)         | 25(83.3 0.2)    | 5(16.7 0.3)     | 19(0.8)         | 16(84.2 0.8)    | 3(15.8 1.0)     |
|                                 | Cluster Munitions                    | 71              | 69(97.2 0.3)     | 2(2.8 0)        | 38(0.3)         | 37(97.4 0.3)    | 1(2.6 0.1)      | 11(0.5)         | 11(100 0.5)     | ..              |
|                                 | ERW                                  | 248             | 233(94.0 1.0)    | 15(6.0 0.3)     | 208(1.7)        | 197(94.7 1.9)   | 11(5.3 0.6)     | 1(0)            | 1(100 0)        | ..              |
| Landmines                       | 9000                                 | 8517(94.6 35.3) | 483(5.4 11.2)    | 4901(39.6)      | 4639(94.7 43.7) | 262(5.3 14.9)   | 1189(51.4)      | 1089(91.6 54.4) | 100(8.4 32.4)   |                 |

<sup>1</sup>the reader is directed to fig. 1 when interpreting this table



|                                 |                                      | Iraq           |                |                 | Myanmar         |                 |                 | Sudan        |                 |                 |
|---------------------------------|--------------------------------------|----------------|----------------|-----------------|-----------------|-----------------|-----------------|--------------|-----------------|-----------------|
|                                 |                                      | Total N(C%)    | Male N(R% C%)  | Female N(R% C%) | Total N(C%)     | Male N(R% C%)   | Female N(R% C%) | Total N(C%)  | Male N(R% C%)   | Female N(R% C%) |
| <b>Total</b>                    |                                      | 3491(..)       | 2956(84.7 ..)  | 535(15.3 ..)    | 5267(..)        | 4634(88.0 ..)   | 633(12.0 ..)    | 5012(..)     | 3919(78.2 ..)   | 1093(21.8 ..)   |
|                                 | Non-trauma                           | 1145(32.8)     | 829(72.4 28)   | 316(27.6 59.1)  | 1219(23.1)      | 908(74.5 19.6)  | 311(25.5 49.1)  | 3007(60.0)   | 2258(75.1 57.6) | 749(24.9 68.5)  |
|                                 | Trauma                               | 2346(67.2)     | 2127(90.7 72)  | 219(9.3 40.9)   | 4048(76.9)      | 3726(92.0 80.4) | 322(8.0 50.9)   | 2005(40.0)   | 1661(82.8 42.4) | 344(17.2 31.5)  |
| <b>Causes by Sub-Categories</b> |                                      |                |                |                 |                 |                 |                 |              |                 |                 |
|                                 | Non-trauma NCD/T2D                   | 1084(31.1)     | 790(72.9 26.7) | 294(27.1 55.0)  | 1138(21.6)      | 846(74.3 18.3)  | 292(25.7 46.1)  | 2835(56.6)   | 2154(76.0 55.0) | 681(24.0 62.3)  |
|                                 | Non-trauma Other                     | 61(1.7)        | 39(63.9 1.3)   | 22(36.1 4.1)    | 81(1.5)         | 62(76.5 1.3)    | 19(23.5 3)      | 172(3.4)     | 104(60.5 2.7)   | 68(39.5 6.2)    |
| Trauma                          | Trauma Non-conflict Non-accident     | 32(0.9)        | 29(90.6 1)     | 3(9.4 0.6)      | 76(1.4)         | 60(78.9 1.3)    | 16(21.1 2.5)    | 404(8.1)     | 311(77.0 7.9)   | 93(23.0 8.5)    |
|                                 | Trauma Non-conflict Accident         | 525(15)        | 446(85 15.1)   | 79(15 14.8)     | 1689(32.1)      | 1469(87.0 31.7) | 220(13.0 34.8)  | 965(19.3)    | 805(83.4 20.5)  | 160(16.6 14.6)  |
|                                 | Trauma Conflict Weapon               | 1075(30.8)     | 978(91 33.1)   | 97(9.0 18.1)    | 83(1.6)         | 77(92.8 1.7)    | 6(7.2 0.9)      | 579(11.6)    | 494(85.3 12.6)  | 85(14.7 7.8)    |
|                                 | Trauma Conflict Weapon contamination | 714(20.5)      | 674(94.4 22.8) | 40(5.6 7.5)     | 2200(41.8)      | 2120(96.4 45.7) | 80(3.6 12.6)    | 57(1.1)      | 51(89.5 1.3)    | 6(10.5 0.5)     |
| <b>Causes in Detail</b>         |                                      |                |                |                 |                 |                 |                 |              |                 |                 |
| Non-trauma                      | Infectious                           | 367(10.5)      | 260(70.8 8.8)  | 107(29.2 20.0)  | 542(10.3)       | 387(71.4 8.4)   | 155(28.6 24.5)  | 1386(27.7)   | 1033(74.5 26.4) | 353(25.5 32.3)  |
|                                 | Metabolic                            | ..             | ..             | ..              | 11(0.2)         | 5(45.5 0.1)     | 6(54.5 0.9)     | ..           | ..              | ..              |
|                                 | Vascular                             | 717(20.5)      | 530(73.9 17.9) | 187(26.1 35.0)  | 585(11.1)       | 454(77.6 9.8)   | 131(22.4 20.7)  | 1449(28.9)   | 1121(77.4 28.6) | 328(22.6 30)    |
|                                 | Cancerous                            | 60(1.7)        | 38(63.3 1.3)   | 22(36.7 4.1)    | 74(1.4)         | 57(77.0 1.2)    | 17(23.0 2.7)    | 172(3.4)     | 104(60.5 2.7)   | 68(39.5 6.2)    |
|                                 | Other – Non-Trauma                   | 1(0)           | 1(100 0)       | ..              | 7(0.1)          | 5(71.4 0.1)     | 2(28.6 0.3)     | ..           | ..              | ..              |
| Trauma                          | Infectious                           | 4(0.1)         | 3(75 0.1)      | 1(25.0 0.2)     | 20(0.4)         | 13(65.0 0.3)    | 7(35.0 1.1)     | 148(3.0)     | 115(77.7 2.9)   | 33(22.3 3.0)    |
|                                 | Crime                                | 2(0.1)         | 2(100 0.1)     | ..              | ..              | ..              | ..              | ..           | ..              | ..              |
|                                 | Frost bite                           | 6(0.2)         | 6(100 0.2)     | ..              | 3(0.1)          | 3(100 0.1)      | ..              | 2(0)         | 2(100 0.1)      | ..              |
|                                 | Other – Trauma                       | 20(0.6)        | 18(90.0 0.6)   | 2(10.0 0.4)     | 53(1)           | 44(83.0 0.9)    | 9(17.0 1.4)     | 254(5.1)     | 194(76.4 5)     | 60(23.6 5.5)    |
|                                 | Domestic accident                    | 83(2.4)        | 66(79.5 2.2)   | 17(20.5 3.2)    | 297(5.6)        | 259(87.2 5.6)   | 38(12.8 6)      | 131(2.6)     | 92(70.2 2.3)    | 39(29.8 3.6)    |
|                                 | Occupational accident                | 102(2.9)       | 95(93.1 3.2)   | 7(6.9 1.3)      | 553(10.5)       | 499(90.2 10.8)  | 54(9.8 8.5)     | 63(1.3)      | 60(95.2 1.5)    | 3(4.8 0.3)      |
|                                 | Railway accident                     | 8(0.2)         | 6(75 0.2)      | 2(25.0 0.4)     | 164(3.1)        | 129(78.7 2.8)   | 35(21.3 5.5)    | 42(0.8)      | 37(88.1 0.9)    | 5(11.9 0.5)     |
|                                 | RTA                                  | 325(9.3)       | 272(83.7 9.2)  | 53(16.3 9.9)    | 637(12.1)       | 546(85.7 11.8)  | 91(14.3 14.4)   | 709(14.1)    | 600(84.6 15.3)  | 109(15.4 10)    |
|                                 | Sport accident                       | 7(0.2)         | 7(100 0.2)     | ..              | 38(0.7)         | 36(94.7 0.8)    | 2(5.3 0.3)      | 19(0.4)      | 16(84.2 0.4)    | 3(15.8 0.3)     |
|                                 | Blast injury                         | 844(24.2)      | 770(91.2 26)   | 74(8.8 13.8)    | 17(0.3)         | 15(88.2 0.3)    | 2(11.8 0.3)     | 60(1.2)      | 53(88.3 1.4)    | 7(11.7 0.6)     |
|                                 | GSW                                  | 144(4.1)       | 130(90.3 4.4)  | 14(9.7 2.6)     | 60(1.1)         | 56(93.3 1.2)    | 4(6.7 0.6)      | 445(8.9)     | 382(85.8 9.7)   | 63(14.2 5.8)    |
|                                 | Other – Conflict                     | 85(2.4)        | 76(89.4 2.6)   | 9(10.6 1.7)     | 4(0.1)          | 4(100 0.1)      | ..              | 71(1.4)      | 58(81.7 1.5)    | 13(18.3 1.2)    |
|                                 | No data*                             | 2(0.1)         | 2(100 0.1)     | ..              | 2(0)            | 2(100 0)        | ..              | 3(0.1)       | 1(33.3 0)       | 2(66.7 0.2)     |
|                                 | Cluster Munitions                    | 2(0.1)         | 2(100 0.1)     | ..              | 6(0.1)          | 6(100 0.1)      | ..              | 14(0.3)      | 13(92.9 0.3)    | 1(7.1 0.1)      |
|                                 | ERW                                  | 38(1.1)        | 34(89.5 1.2)   | 4(10.5 0.7)     | 1(0)            | 1(100 0)        | ..              | ..           | ..              | ..              |
| Landmine                        | 674(19.3)                            | 638(94.7 21.6) | 36(5.3 6.7)    | 2193(41.6)      | 2113(96.4 45.6) | 80(3.6 12.6)    | 43(0.9)         | 38(88.4 1.0) | 5(11.6 0.5)     |                 |

Categories of amputation causes as illustrated in figure 1 and detailed causes in totals, by sex and by country. Values are number of participants (row % | column%). Row% relates to sex distribution. Column% relates to amputation cause distribution. RTA = road traffic accident; GSW = Gunshot wound; ERW = explosive remnants of war; no data = missing variable (mandatory entry in database) due to software error in the category ‘Trauma Conflict Weapon’.

1  
2  
3 Among all men, 18636 (77.3%) of 24117 had traumatic amputations. Among all women,  
4 2254 (52.1%) of 4329 had traumatic amputation.

5  
6 Sudan had the highest proportion of non-traumatic amputations, 3007 (60.0%) of 5012,  
7 outnumbering traumatic amputations across both sexes and had an overall higher female  
8 representation of 1093 (21.8%) of 5012 compared to the remaining countries.

9  
10 Despite the high numbers of conflict-related amputation in the overall cohort, 1885 (43.5%)  
11 of 4329 females and 5114 (21.2%) of 24117 males presented with a likely T2D related  
12 amputation.

13  
14 One third (9319 [32.8%] of 28466) of the overall cohort attended with amputation caused by  
15 weapon-contamination. RTA constituted 3044 (10.7%) of all amputation causes. Blast injury  
16 caused 2319 (8.2%) and gunshot wound (GSW) 1834 (6.4%) of all amputations.

17  
18 More than half of all men presented with conflict-related traumatic amputations, 12691  
19 (52.7%) of 24117, landmines alone constituted 8571 (35.3%) of all males' amputations.  
20 Within women, traumatic amputations were evenly distributed between conflict and non-  
21 conflict related (1110 [25.7%] and 1144 [26.4%] of 4329, respectively). Landmines caused  
22 483 (11.2%), RTA 396 (9.1%) and domestic accidents 369 (8.5%) of all females' amputations.  
23 Proportions of men compared to women were significantly higher in most traumatic causes.  
24 This was even more pronounced in conflict-related causes and highest for landmines, 8517  
25 (94.6%) of 9000. Female proportions compared to men were highest in traumatic  
26 amputations caused by animal bite and domestic accident with 47 (23.2%) of 203 and 369  
27 (26.6%) of 1388 respectively.

28  
29 In Myanmar, weapon-contamination caused 2200 (41.8%) of 5267 amputations, in  
30 Afghanistan 5147 (41.6%) of 12364, in Iraq 714 (20.5%) of 3491, in Sudan 57 (1.1%) of 5012 –  
31 and in post-conflict Cambodia 1201 (51.9%) of 2312.

32  
33 Table 4 illustrates amputation characteristics by combinations and levels. Multiple  
34 amputations were present in 2014 (8.4%) of 24117 men and 337 (7.8%) of 4329 women.  
35 Double LEA was the most common combination occurring in 1575 (6.5%) men and 293  
36 (6.8%) women and more likely in persons with traumatic amputations (1566 [7.5%] of  
37 20890) compared to those with non-traumatic amputations (302 [4.0%] of 7556).

38  
39 In total, 30943 amputations were registered, of which 15399 (49.8%) were transtibial, 8080  
40 (26.1%) transfemoral, 1973 (6.4%) transradial, 1866 (6.0%) partial foot and 1078 (3.5%)  
41 transhumeral. Of all non-traumatic amputations, 7680 (98.0% of 7835) were LEA, the  
42 majority transtibial (5008 [63.9%]), whereas 2613 (12.0% of 19182) of all traumatic  
43 amputations occurred in the upper extremity.  
44  
45  
46  
47  
48  
49  
50  
51  
52  
53  
54  
55  
56  
57  
58  
59  
60

**Table 4. Amputation characteristics - Combinations and levels of amputation**

| Combinations of amputation(s)                       | All Amputations       |                         |                         | Non-Traumatic Amputations |                        |                         | Traumatic Amputations |                         |                         |
|-----------------------------------------------------|-----------------------|-------------------------|-------------------------|---------------------------|------------------------|-------------------------|-----------------------|-------------------------|-------------------------|
|                                                     | Total SU (C%)         | Male N (R% C%)          | Female N (R% C%)        | Total (C%)                | Male N(R% C%)          | Female N(R% C%)         | Total (C%)            | Male N(R% C%)           | Female N(R% C%)         |
| <b>Total SU</b>                                     | <b>28446</b>          | <b>24117 (84.8 ..)</b>  | <b>4329 (15.2 ..)</b>   | <b>7556(0)</b>            | <b>5481(72.5 0)</b>    | <b>2075(27.5 0)</b>     | <b>20890(0)</b>       | <b>18636(89.2 0)</b>    | <b>2254(10.8 0)</b>     |
| SU with single LEA                                  | 22693 (79.8)          | 19152 (84.4 79.4)       | 3541 (15.6 81.8)        | 7049(93.3)                | 5122(72.7 93.5)        | 1927(27.3 92.9)         | 15644(74.9)           | 14030(89.7 75.3)        | 1614(10.3 71.6)         |
| SU with single UEA                                  | 3402 (12.0)           | 2951 (86.7 12.2)        | 451 (13.3 10.4)         | 177(2.3)                  | 110(62.1 2.0)          | 67(37.9 3.2)            | 3225(15.4)            | 2841(88.1 15.2)         | 384(11.9 17.0)          |
| SU with double LEA                                  | 1868 (6.6)            | 1575 (84.3 6.5)         | 293 (15.7 6.8)          | 302(4.0)                  | 225(74.5 4.1)          | 77(25.5 3.7)            | 1566(7.5)             | 1350(86.2 7.2)          | 216(13.8 9.6)           |
| SU with double UEA                                  | 157 (0.6)             | 149 (94.9 0.6)          | 8 (5.1 0.2)             | 6(0.1)                    | 6(100 0.1)             | ..                      | 151(0.7)              | 143(94.7 0.8)           | 8(5.3 0.4)              |
| SU with single LEA + single UEA                     | 195 (0.7)             | 177 (90.8 0.7)          | 18 (9.2 0.4)            | 15(0.2)                   | 13(86.7 0.2)           | 2(13.3 0.1)             | 180(0.9)              | 164(91.1 0.9)           | 16(8.9 0.7)             |
| SU with double LEA + single UEA                     | 92 (0.3)              | 80 (87.0 0.3)           | 12 (13.0 0.3)           | 3(0)                      | 3(100 0.1)             | ..                      | 89(0.4)               | 77(86.5 0.4)            | 12(13.5 0.5)            |
| SU with single LEA + double UEA                     | 24 (0.1)              | 22 (91.7 0.1)           | 2 (8.3 0)               | 2(0)                      | 1(50 0)                | 1(50 0)                 | 22(0.1)               | 21(95.5 0.1)            | 1(4.5 0)                |
| SU with double LEA + double UEA                     | 15 (0.1)              | 11 (73.3 0)             | 4 (26.7 0.1)            | 2(0)                      | 1(50 0)                | 1(50 0)                 | 13(0.1)               | 10(76.9 0.1)            | 3(23.1 0.1)             |
| <b>Levels of amputation(s)</b>                      | <b>Total Amp (C%)</b> | <b>Amp in male SU</b>   | <b>Amp in female SU</b> | <b>Total Amp</b>          | <b>Amp in male SU</b>  | <b>Amp in female SU</b> | <b>Total Amp</b>      | <b>Amp in male SU</b>   | <b>Amp in female SU</b> |
| <b>Total amputations</b>                            | <b>30943</b>          | <b>26255 (84.8 ..)</b>  | <b>4688 (15.2 ..)</b>   | <b>7835</b>               | <b>5694 (72.7 0)</b>   | <b>2141 (27.3 0)</b>    | <b>21795</b>          | <b>19384 (88.9 0)</b>   | <b>2411 (11.1 0)</b>    |
| <b>Total LEA amputations</b>                        | <b>26862(86.8)</b>    | <b>22683(84.4 86.4)</b> | <b>4179(15.6 89.1)</b>  | <b>7680(98.0)</b>         | <b>5594(72.8 98.2)</b> | <b>2086(27.2 97.4)</b>  | <b>19182(88.0)</b>    | <b>17089(89.1 88.2)</b> | <b>2093(10.9 86.8)</b>  |
| Partial foot amputations                            | 1866(6.0)             | 1374(73.6 5.2)          | 492(26.4 10.5)          | 333(4.3)                  | 241(72.4 4.2)          | 92(27.6 4.3)            | 1533(7.0)             | 1133(73.9 5.8)          | 400(26.1 16.6)          |
| Ankle disarticulations                              | 432(1.4)              | 349(80.8 1.3)           | 83(19.2 1.8)            | 117(1.5)                  | 79(67.5 1.4)           | 38(32.5 1.8)            | 315(1.4)              | 270(85.7 1.4)           | 45(14.3 1.9)            |
| Transstibial amputations                            | 15399(49.8)           | 13017(84.5 49.6)        | 2382(15.5 50.8)         | 5008(63.9)                | 3665(73.2 64.4)        | 1343(26.8 62.7)         | 10391(47.7)           | 9352(90.0 48.2)         | 1039(10.0 43.1)         |
| Knee disarticulations/<br>Transcondylar amputations | 887(2.9)              | 759(85.6 2.9)           | 128(14.4 2.7)           | 164(2.1)                  | 128(78 2.2)            | 36(22 1.7)              | 723(3.3)              | 631(87.3 3.3)           | 92(12.7 3.8)            |
| Transfemoral amputations                            | 8080(26.1)            | 7019(86.9 26.7)         | 1061(13.1 22.6)         | 1983(25.3)                | 1430(72.1 25.1)        | 553(27.9 25.8)          | 6097(28)              | 5589(91.7 28.8)         | 508(8.3 21.1)           |
| Hip disarticulation/<br>Hemipelvectomy              | 198(0.6)              | 165(83.3 0.6)           | 33(16.7 0.7)            | 75(1.0)                   | 51(68 0.9)             | 24(32 1.1)              | 123(0.6)              | 114(92.7 0.6)           | 9(7.3 0.4)              |
| <b>Total UEA amputations</b>                        | <b>4081(13.2)</b>     | <b>3572(87.5 13.6)</b>  | <b>509(12.5 10.9)</b>   | <b>155(2.0)</b>           | <b>100(64.5 1.8)</b>   | <b>55(35.5 2.6)</b>     | <b>2613(12.0)</b>     | <b>2295(87.8 11.8)</b>  | <b>318(12.2 13.2)</b>   |
| Partial hand amputations                            | 322(1.0)              | 258(80.1 1.0)           | 64(19.9 1.4)            | 21(0.3)                   | 12(57.1 0.2)           | 9(42.9 0.4)             | 124(0.6)              | 94(75.8 0.5)            | 30(24.2 1.2)            |
| Wrist disarticulations                              | 436(1.4)              | 393(90.1 1.5)           | 43(9.9 0.9)             | 11(0.1)                   | 8(72.7 0.1)            | 3(27.3 0.1)             | 417(1.9)              | 378(90.6 2.0)           | 39(9.4 1.6)             |
| Transradial amputations                             | 1973(6.4)             | 1762(89.3 6.7)          | 211(10.7 4.5)           | 37(0.5)                   | 23(62.2 0.4)           | 14(37.8 0.7)            | 820(3.8)              | 731(89.1 3.8)           | 89(10.9 3.7)            |
| Elbow disarticulations                              | 151(0.5)              | 131(86.8 0.5)           | 20(13.2 0.4)            | 9(0.1)                    | 6(66.7 0.1)            | 3(33.3 0.1)             | 139(0.6)              | 123(88.5 0.6)           | 16(11.5 0.7)            |
| Transhumeral amputations                            | 1078(3.5)             | 927(86 3.5)             | 151(14.0 3.2)           | 66(0.8)                   | 42(63.6 0.7)           | 24(36.4 1.1)            | 1004(4.6)             | 877(87.4 4.5)           | 127(12.6 5.3)           |
| Shoulder disarticulations                           | 121(0.4)              | 101(83.5 0.4)           | 20(16.5 0.4)            | 11(0.1)                   | 9(81.8 0.2)            | 2(18.2 0.1)             | 109(0.5)              | 92(84.4 0.5)            | 17(15.6 0.7)            |

Values are number of participants and number of amputations, respectively (row % | column %). Row% relates to sex distribution. Column% relates to amputation characteristic distribution. SU = service user; LEA = lower extremity amputation; UEA = upper extremity amputation

## DISCUSSION

Traumatic amputation at young adult age has devastating effects on a person's private and professional perspectives. A worrying finding in this study was the delay between amputation and beginning rehabilitation, particularly for those with traumatic amputation, (mean 8.2 years). Ideally, prosthetic fitting happens right after wound healing. Any delay will increase functional limitations and the potential of complications.<sup>20</sup> Consequently, duration, costs and complexity of rehabilitation will rise, including prosthetic adjustments. In cases of irreversible limitations PwA may no longer qualify for fitting.<sup>5</sup> The studied countries are marked either by protracted crisis with recurring flares of acute fighting or post-conflict with weak economy and fragile health systems.<sup>17</sup> These factors result in high numbers of PwA, who face access difficulties to rehabilitation aggravated by compromised infrastructure and security, lack of means or awareness, and critical scarcity or overload of existing rehabilitation workforce and services.<sup>4,21,22</sup>

The later age observed for non-traumatic amputation is not surprising, but the average age of 48.2 years is very low compared to studies in HIC reporting ages of over 65.<sup>1,23</sup>

Amputations at young age as a complication of underlying health conditions such as T2D reflect the many health system challenges in the studied countries.<sup>24</sup> Although this group attends rehabilitation significantly faster than the traumatic group, the delay (mean 3 years) is still considerable and potentially harmful in view of the risks associated with immobility in poorly managed T2D. The difference in delay between the traumatic and non-traumatic cohorts may be explained by the widespread lack of essential healthcare services during past conflict (e.g. Cambodia). This may have led to high mortality rates in persons with conditions like T2D. PwA of traumatic origin may have survived long enough to eventually attend rehabilitation, after years of unavailability or inaccessibility of services. This could explain the considerable backlog of persons with traumatic amputations. A steadfast interpretation of detailed delays is impossible owing to the extremely complex conflict history and uncertain service provision in the studied contexts including displaced populations, persons of a specific ethnicity or with a political or military past unable to cross certain combat zones. What we know for sure is that an amputation at working age and delayed prosthetic fitting and rehabilitation – not counting the unknown numbers of non-attendees – feed into the vicious cycle of disability and poverty, increasing the difficulties PwA face when it comes to reintegrating into society in these contexts.<sup>22,25</sup>

The proportions of non-traumatic and traumatic amputations are reversed compared to non-conflict countries and disclose the human cost of protracted crises.<sup>23,26</sup> Amputations as a result of explosive devices lead to complex injuries.<sup>4,9</sup> Patient outcomes depend on the availability and capacity of specialised emergency and surgical care if the effects of polytraumas are handled optimally. Subject to the extent of injury and the firearm used, amputations from GSW may also be an indicator of delayed trauma- and general poor health-care. In remote areas injured people may reach medical assistance only at a stage when the affected limb can no longer be saved. Furthermore, amputation being less time-consuming and risky than limb salvage may be indicated to assist higher numbers of people.<sup>27,28</sup> A person with traumatic amputation needs to cope with the sudden loss when

1  
2  
3 adapting to a life with permanent disability. Rehabilitation outcomes depend on the  
4 complexity of polytraumas. The psychological consequences and post-traumatic  
5 repercussions, are considerable after traumatic amputation and require specialised  
6 multidisciplinary care.<sup>9,25,29</sup>

7  
8 Afghanistan, Cambodia and Iraq rank among the most mine-contaminated countries  
9 worldwide, (data from Myanmar are unavailable).<sup>30</sup> Survivors with amputations from  
10 weapon-contamination symbolise the long-term consequences of conflict, which may last  
11 for decades and continue producing injuries and disability long after the end of active  
12 fighting. Cambodia's almost 30 years of conflict, for instance, ended in 1998. Between 2009  
13 and 2018 more than half of all new registrations attending rehabilitation were male PwA  
14 caused by landmines exemplifying the sustained destructive potential of conflict on a  
15 society.  
16

17  
18 Many PRCs operate independently of other health structures and without medical personnel  
19 to confirm T2D diagnosis. Therefore, the numbers of amputation due to T2D may be  
20 underestimated, a conclusion also reported in amputation incidence studies.<sup>1</sup> Metabolic and  
21 vascular causes as noted by rehabilitation personnel without diagnostic tools and  
22 competencies were most probably linked to T2D, vascular complication of T2D or another  
23 vascular NCD. Likewise, most infections causing non-traumatic amputations were assumed  
24 to result from undiagnosed or undocumented T2D with infected ulcer and gangrene.<sup>12</sup>  
25 PwA due to T2D in fragile settings are a highly vulnerable group. The amputation will be the  
26 consequence of a progressing chronic illness, which might be diagnosed only at the time of  
27 complication and which the person will have to cope with on top of the limb loss. If  
28 diagnosed, the person's understanding of their health status and its implications for lifestyle  
29 changes will be crucial. The risk of complications is considerable as the 39–68% five years  
30 mortality rate of diabetic foot shows.<sup>31</sup>  
31

32  
33 In conflict countries, the comprehensive care required for conditions like T2D is challenged  
34 by lack of availability, affordability and access to inter-professional services for diagnosis and  
35 long-term management. It is also compromised by the environment as living in displacement  
36 and depending on aid do not facilitate the necessary lifestyle adaptations, such as diet and  
37 exercise. Deprioritisation of NCD-care in crisis settings in order to address immediate trauma  
38 and prevent epidemics puts T2D patients at higher risk of neglect.<sup>12</sup> The consequences of the  
39 rocketing prevalence of T2D worldwide are exacerbated in conflict, of which, furthermore,  
40 many currently occur in regions such as the Eastern Mediterranean with an increased  
41 burden of T2D.<sup>11,32</sup> Regaining functionality through active rehabilitation may be more  
42 demanding compared to someone with traumatic amputation due to age and general health  
43 differences between both populations. The fitting process will be more complicated due to  
44 the remaining limb's shape and consistency. Complex chronic conditions require a kind of  
45 rehabilitation that PRCs in conflict zones may not be organized for.  
46

47  
48 The lack of T2D diagnostic data highlights the PRCs' unpreparedness for such scenarios,  
49 which will require changes of procedures, staffing ratio, occupancy rates and equipment and  
50 enhanced workforce skills regarding NCD/T2D management, diagnostics and data  
51 collections. Improved NCD management on primary healthcare level is the first step.<sup>33</sup>  
52  
53  
54  
55  
56  
57  
58  
59  
60

1  
2  
3 Equally important will be adaptations of referral systems, interprofessional collaborations  
4 across the continuum of care and investments in systematic promotion of physical activity  
5 and preventive measures for persons at risk.

6  
7 The peak of amputation among young adult males and the significant majority of male PwA  
8 may be explained by ongoing conflict in most contexts. There is consensus in the literature  
9 that worldwide more males than females undergo amputation, but the distribution differs  
10 according to age and cause.<sup>1,34,35</sup> Especially during active age and regardless of conflict, rates  
11 are higher in men due to work- or leisure-related accidents.<sup>26,36</sup> Despite a similar T2D  
12 prevalence among sexes, T2D-related amputation rates are higher among men due to higher  
13 prevalence of smoking, peripheral vascular disease, neuropathy and diabetic foot  
14 ulceration.<sup>1</sup> For certain groups a gender dimension may influence access to rehabilitation.  
15 Higher female than male proportions are reported for older persons with traumatic  
16 amputations which are unlikely due to combat or occupational risk.<sup>35,36</sup> This is in contrast to  
17 the significant male majority in our study population. Also, our findings revealed that in  
18 urban environments, and in contrast to men, female PwA attending rehabilitation constitute  
19 a significantly larger proportion than in rural environments. Access barriers to services for  
20 women from more remote rural areas may exist such as challenging infrastructure, poverty,  
21 insecurity, and cultural factors and warrant further investigation.<sup>37</sup>

22  
23 The main limitation of this study is that data is derived from ICRC PRCs only and therefore  
24 not representative of population. However, in absence of amputation incidence data this  
25 first multi-country analysis offers a unique insight into the population of rehabilitation users  
26 with amputations in fragile contexts including (ex-)combatants and civilians of all ages with  
27 amputations of all origins. As the data does not represent prevalence, but attendance to  
28 rehabilitation, it is difficult to estimate how many PwA do not receive services. Where  
29 existing, data was compared to published prevalence studies from similar contexts. The  
30 dearth of quality publications in such contexts underlines the mismatch between existing  
31 research and where the burden of disease is.<sup>10</sup>

## 32 33 34 35 36 37 38 CONCLUSION

39  
40 This study highlights the persisting burden of amputation in conflict contexts and the  
41 consequences of broken health systems and a fragmented continuum of care. Young age  
42 and long delays to rehabilitation reveal the hardship in which PwAs live in such settings. The  
43 figures of landmine-caused amputations disclose the cruel long-term dimension of conflict.  
44 Rehabilitation services are seriously under-resourced as revealed in a recent publication on  
45 global estimates of rehabilitation needs.<sup>38</sup> Our data have been collected in highly challenging  
46 and diverse settings where even basic healthcare is compromised. Providing rehabilitation  
47 and collecting data in these underserved, volatile contexts is exceptionally complex.<sup>14</sup> The  
48 few PRCs in conflict settings cater for amputations of various causes and PwA of different  
49 age, sex, other trauma and co-morbidities including psychological after-effects and future  
50 prospects of life with amputation. This requires tailored approaches matched with outcome  
51 and impact measurements. Managing these highly diverse processes is the responsibility of a  
52 multidisciplinary rehabilitation team including peer-support by other PwA – an enormous  
53 challenge in settings with so many needs and so little resources.

1  
2  
3 Preventive measures on all levels of healthcare are essential to reduce the number of T2D-  
4 caused amputations. Rather than solely managing amputations as the last consequence,  
5 PRCs should get increasingly involved in provision of comprehensive care.  
6

7 We call out to rehabilitation service providers and healthcare professionals for a stronger  
8 and prompt involvement of rehabilitation professionals in all levels of NCD/T2D  
9 management. In addition, it is crucial that future research identifies and tests efficient,  
10 innovative, context-adapted best practice models including service provision and impact  
11 measurement to address the mismatch of rehabilitation needs and resources in fragile  
12 settings.  
13  
14  
15  
16

#### 17 FUNDING

18  
19 This research received no specific grant from any funding agency in the public, commercial  
20 or not-for-profit sectors.

21 ICRC and Linköping University sponsored research group meetings for study design and data  
22 analysis at University College Dublin.  
23  
24  
25

#### 26 COMPETING INTERESTS

27  
28 None declared  
29  
30

#### 31 ACKNOWLEDGEMENTS

32  
33 We would like to thank the ICRC personnel and PRC managers in the respective countries for  
34 advice and insights in data interpretation: Alberto Cairo and team from Afghanistan, Denver  
35 Graham, Phalla Keo and team from Cambodia, Therese Powell, Srood Suad Nafie and team  
36 from Iraq, Imad Aldibee and team from Sudan.  
37  
38  
39  
40  
41  
42  
43  
44  
45  
46  
47  
48  
49  
50  
51  
52  
53  
54  
55  
56  
57  
58  
59  
60

1  
2  
3 CONTRIBUTORSHIP STATEMENT  
4  
5

6 All six authors contributed to planning, conduct and reporting of the study.  
7

8  
9 Specific additional contributions are as follows:  
10

11  
12 Cornelia A. Barth: literature research, data acquisition and analysis, conception and design,  
13 data interpretation  
14

15  
16 Andreas Wladis: conception and design, data interpretation  
17

18  
19 Catherine Blake: conception and design, data analysis and interpretation  
20

21  
22 Sigiriya Aebischer Perone: literature research, data interpretation  
23

24  
25 Prashant Bhandarkar: data tabulation, analysis and interpretation  
26

27  
28 Cliona O'Sullivan: literature research, conception and design, data interpretation  
29

30 DATA AVAILABILITY STATEMENT  
31

32  
33 All relevant data are included in the tables of this study.  
34

35  
36 Due to the sensitive nature of this data, data sharing is subject to regulations of ICRC data  
37 protection policy.  
38  
39  
40  
41  
42  
43  
44  
45  
46  
47  
48  
49  
50  
51  
52  
53  
54  
55  
56  
57  
58  
59  
60



## REFERENCES

- 1 Narres M, Kvitkina T, Claessen H, *et al.* Incidence of lower extremity amputations in the diabetic compared with the non-diabetic population: A systematic review. *PLoS One* 2017; **12**: e0182081.
- 2 Global Lower Extremity Amputation Study Group. Epidemiology of lower extremity amputation in centres in Europe, North America, and East Asia. *Br J Surg* 2000; **87**: 328–37.
- 3 Wachtel MS. Family poverty accounts for differences in lower-extremity amputation rates of minorities 50 years old or more with diabetes. *J Natl Med Assoc* 2005; **97**: 334–8.
- 4 Mathieu L, Marty A, Ramaki A, *et al.* Current issues with lower extremity amputations in a country at war: Experience from the national military hospital of Kabul. *Eur J Trauma Emerg Surg* 2014; **40**: 387–93.
- 5 International Committee of the Red Cross. Prosthetic Gait Analysis for Physiotherapists. Geneva: International Committee of the Red Cross, 2014.
- 6 Krueger CA, Wenke JC, Ficke JR. Ten years at war: Comprehensive analysis of amputation trends. *J Trauma Acute Care Surg* 2012; **73**: S438–44.
- 7 Christensen J, Ipsen T, Doherty P, Langberg H. Physical and social factors determining quality of life for veterans with lower-limb amputation(s): a systematic review. *Disabil Rehabil.* 2016; **38**: 2345–53.
- 8 Dougherty PJ, McFarland L V., Smith DG, Reiber GE. Combat-incurred bilateral transfemoral limb loss: A comparison of the Vietnam War to the wars in Afghanistan and Iraq. *J Trauma Acute Care Surg* 2012; **73**: 1590–5.
- 9 Ebrahimzadeh MH, Moradi A, Khorasani MR, *et al.* Long-term clinical outcomes of war-related bilateral lower extremities amputations. *Inj Int J Care Inj* 2015; **46**: 275–81.
- 10 Jain RP, Meteke S, Gaffey MF, *et al.* Delivering trauma and rehabilitation interventions to women and children in conflict settings: A systematic review. *BMJ Glob Heal* 2020; **5**: 1980.
- 11 James SL, Abate D, Abate KH, *et al.* Global, regional, and national incidence, prevalence, and years lived with disability for 354 diseases and injuries for 195 countries and territories, 1990–2017: a systematic analysis for the Global Burden of Disease Study 2017. *Lancet* 2018; **392**: 1789–858.
- 12 Aziz ARA, Alsabek MB. Diabetic foot and disaster; risk factors for amputation during the Syrian crisis. *J Diabetes Complications* 2020; **34**: 107493.
- 13 World Health Organization. Global Status Report on Road Safety 2018. Geneva: World Health Organisation, 2018.
- 14 Barth CA, Wladis A, Blake C, Bhandarkar P, O’Sullivan C. Users of rehabilitation services in 14 countries and territories affected by conflict, 1988–2018. *Bull World Health Organ* 2020; **98**: 599–614.
- 15 International Committee of the Red Cross. Physical Rehabilitation Programme. Annual Report 2019. Geneva, 2020.
- 16 International Committee of the Red Cross. The ICRC’s mission statement. 2008. <https://www.icrc.org/en/doc/resources/documents/misc/icrc-mission-190608.htm>.

- 1  
2  
3 17 International Committee of the Red Cross. Protracted conflict and humanitarian  
4 action: some recent ICRC experiences. Geneva, 2016  
5 [https://www.icrc.org/sites/default/files/document/file\\_list/protracted\\_conflict\\_and\\_](https://www.icrc.org/sites/default/files/document/file_list/protracted_conflict_and_humanitarian_action_icrc_report_lr_29.08.16.pdf)  
6 [humanitarian\\_action\\_icrc\\_report\\_lr\\_29.08.16.pdf](https://www.icrc.org/sites/default/files/document/file_list/protracted_conflict_and_humanitarian_action_icrc_report_lr_29.08.16.pdf) (accessed July 10, 2019).  
7  
8 18 International Committee of the Red Cross. What is the ICRC doing to reduce the  
9 effects of weapon contamination? 2017.  
10 <https://www.icrc.org/en/document/overview-mine-action> (accessed June 21, 2020).  
11  
12 19 Stevens GA, Alkema L, Black RE, *et al*. Guidelines for Accurate and Transparent Health  
13 Estimates Reporting: the GATHER statement. *Lancet*. 2016; **388**: e19–23.  
14  
15 20 Webster JB. Lower Limb Amputation Care Across the Active Duty Military and Veteran  
16 Populations. *Phys Med Rehabil Clin N Am* 2019; **30**: 89–109.  
17  
18 21 Shaw J, Challa S, Conway D, *et al*. Quality of life and complications in lower limb  
19 amputees in Tanzania: results from a pilot study. *Lancet Glob Heal* 2018; **6**: S18.  
20  
21 22 Andregård E, Magnusson L. Experiences of attitudes in Sierra Leone from the  
22 perspective of people with poliomyelitis and amputations using orthotics and  
23 prosthetics. *Disabil Rehabil* 2017; **39**: 2619–25.  
24  
25 23 Godlwana L, Nadasan T, Puckree T. Global Trends in Incidence of Lower Limb  
26 Amputation : A review of the literature. *SA J Physiother* 2008; **64**: 1–5.  
27  
28 24 Carinci F, Massi Benedetti M, Klazinga NS, Uccioli L. Lower extremity amputation rates  
29 in people with diabetes as an indicator of health systems performance. A critical  
30 appraisal of the data collection 2000–2011 by the Organization for Economic  
31 Cooperation and Development (OECD). *Acta Diabetol* 2016; **53**: 825–32.  
32  
33 25 Ferguson AD, Richie BS, Gomez MJ. Psychological factors after traumatic amputation  
34 in landmine survivors: The bridge between physical healing and full recovery. *Disabil*  
35 *Rehabil* 2004; **26**: 931–8.  
36  
37 26 Heikkinen M, Saarinen J, Suominen VP, Virkkunen J, Salenius J. Lower limb  
38 amputations: Differences between the genders and long-term survival. *Prosthet*  
39 *Orthot Int* 2007; **31**: 277–86.  
40  
41 27 Giannou C, Baldan M, Molde A. War Surgery: Working With Limited Resources in  
42 Armed Conflict and Other Situations of Violence (Volume 2). Geneva, 2013.  
43  
44 28 Muhrbeck M, Holmgren K, Osman Z, von Schreeb J, Wladis A, Andersson P. Trends in  
45 Demographics and Surgical Treatment of Weapon-Related Limb Injuries Over Two  
46 Decades in a Resource-Scarce Setting. *World J Surg* 2019; **43**: 2681–8.  
47  
48 29 Muzaffar N, Mansoor I, Hafeez A, Margoob M. Psychiatric comorbidity in amputees  
49 with average sociodemographic status and the role of theologic and family support in  
50 a conflict zone. *Australas J Disaster Trauma Stud* 2012; **2012**: 31–8.  
51  
52 30 ICBL, CMC. Landmine Monitor 2018. Contamination and Clearance. [http://www.the-](http://www.the-monitor.org/en-gb/reports/2018/landmine-monitor-2018/contamination-and-clearance.aspx)  
53 [monitor.org/en-gb/reports/2018/landmine-monitor-2018/contamination-and-](http://www.the-monitor.org/en-gb/reports/2018/landmine-monitor-2018/contamination-and-clearance.aspx)  
54 [clearance.aspx](http://www.the-monitor.org/en-gb/reports/2018/landmine-monitor-2018/contamination-and-clearance.aspx) (accessed March 16, 2020).  
55  
56 31 Dietrich I, Braga GA, de Melo FG, da Costa Silva ACC. The Diabetic Foot as a Proxy  
57 for Cardiovascular Events and Mortality Review. *Curr Atheroscler Rep* 2017; **19**: 44.  
58  
59 32 Moradi-Lakeh M, El Bcheraoui C, Khalil I, *et al*. Diabetes mellitus and chronic kidney  
60 disease in the Eastern Mediterranean Region: findings from the Global Burden of  
Disease 2015 study. *Int J Public Health* 2018; **63**: 177–86.  
33  
34 Tesema AG, Ajisegiri WS, Abimbola S, *et al*. How well are non-communicable disease  
services being integrated into primary health care in Africa: A review of progress  
against World Health Organization’s African regional targets. *PLoS One*. 2020; **15**.

DOI:10.1371/journal.pone.0240984.

- 34 Ephraim PL, Dillingham TR, Sector M, Pezzin LE, MacKenzie EJ. Epidemiology of limb loss and congenital limb deficiency: A review of the literature. *Arch Phys Med Rehabil* 2003; **84**: 747–61.
- 35 Varma P, Stineman MG, Dillingham TR. Epidemiology of Limb Loss. *Phys Med Rehabil Clin N Am* 2014; **25**: 1–8.
- 36 Dillingham TR, Pezzin LE, MacKenzie EJ. Incidence, acute care length of stay, and discharge to rehabilitation of traumatic amputee patients: An epidemiologic study. *Arch Phys Med Rehabil* 1998; **79**: 279–87.
- 37 Sen G, Östlin P. Gender inequity in health: why it exists and how we can change it. *Glob Public Health* 2008; **3**: 1–12.
- 38 Cieza A, Causey K, Kamenov K, Hanson SW, Chatterji S, Vos T. Global estimates of the need for rehabilitation based on the Global Burden of Disease study 2019: a systematic analysis for the Global Burden of Disease Study 2019. *Lancet* 2020; **396**: 2006–17.

Legend for figure 1

All 21 variables on the right are as they appear in mandatory dropdown lists of the database. The database distinguishes between (i) traumatic and all other causes; (ii) conflict-related and all other traumatic causes; (iii) weapon-contamination and all other conflict-related causes; all additional categories were created based on the original 21 variables. NCD/T2D = cause likely linked to non-communicable disease (NCD) or type 2 diabetes mellitus (T2D) complications; RTA= road traffic accident; GSW= Gunshot wound; No data = software error; ERW= explosive remnants of war

For peer review only

Figure 1. Classification of amputation causes with % of total persons with amputations

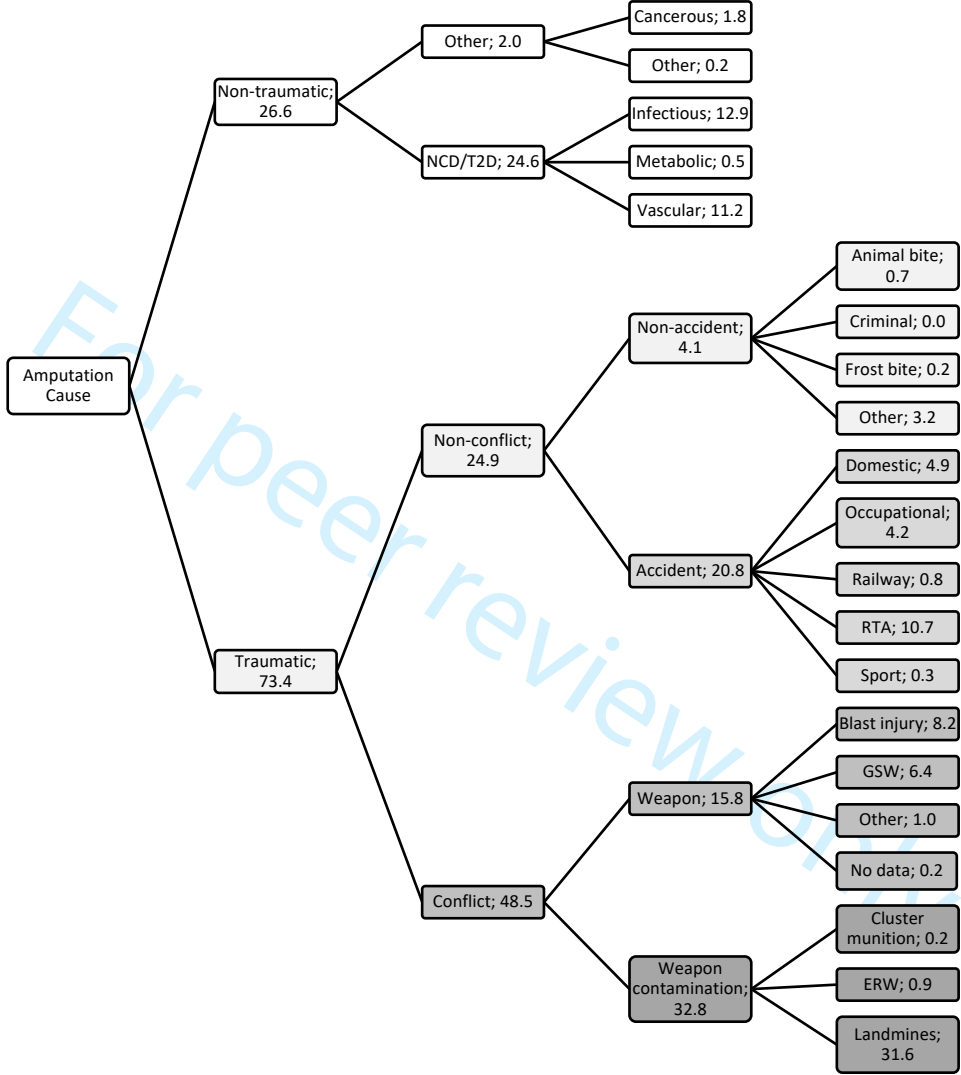

All 21 variables on the right are as they appear in mandatory dropdown lists of the database. The database distinguishes between (i) traumatic and all other causes; (ii) conflict-related and all other traumatic causes; (iii) weapon-contamination and all other conflict-related causes; all additional categories were created based on the original 21 variables. NCD/T2D = cause likely linked to non-communicable disease (NCD) or type 2 diabetes mellitus (T2D) complications; RTA= road traffic accident; GSW= Gunshot wound; No data = software error; ERW= explosive remnants of war

# BMJ Open

## Retrospective observational study of characteristics of persons with amputations accessing International Committee of the Red Cross (ICRC) rehabilitation centres in five conflict and post-conflict countries

|                                 |                                                                                                                                                                                                                                                                                                                                                                                                                                                                                                                                                                                                                                                                                   |
|---------------------------------|-----------------------------------------------------------------------------------------------------------------------------------------------------------------------------------------------------------------------------------------------------------------------------------------------------------------------------------------------------------------------------------------------------------------------------------------------------------------------------------------------------------------------------------------------------------------------------------------------------------------------------------------------------------------------------------|
| Journal:                        | <i>BMJ Open</i>                                                                                                                                                                                                                                                                                                                                                                                                                                                                                                                                                                                                                                                                   |
| Manuscript ID                   | bmjopen-2021-049533.R1                                                                                                                                                                                                                                                                                                                                                                                                                                                                                                                                                                                                                                                            |
| Article Type:                   | Original research                                                                                                                                                                                                                                                                                                                                                                                                                                                                                                                                                                                                                                                                 |
| Date Submitted by the Author:   | 01-Jul-2021                                                                                                                                                                                                                                                                                                                                                                                                                                                                                                                                                                                                                                                                       |
| Complete List of Authors:       | Barth, Cornelia; University College Dublin, School of Public Health, Physiotherapy and Sports Science<br>Wladis, Andreas; Linköping University, Department of Biomedical and Clinical Sciences (BKV)<br>Blake, Catherine; University College Dublin, School of Public Health, Physiotherapy and Sports Science<br>Bhandarkar, Prashant; WHO collaborating centre for research in surgical needs in LMICs, BARC Hospital ; Tata Institute of Social Sciences School of Health Systems Studies,<br>Aebischer Perone, Sigirya; International Committee of the Red Cross,<br>O'Sullivan, Cliona; University College Dublin, School of Public Health, Physiotherapy and Sports Science |
| <b>Primary Subject Heading</b>: | Rehabilitation medicine                                                                                                                                                                                                                                                                                                                                                                                                                                                                                                                                                                                                                                                           |
| Secondary Subject Heading:      | Global health, Epidemiology, Health services research                                                                                                                                                                                                                                                                                                                                                                                                                                                                                                                                                                                                                             |
| Keywords:                       | REHABILITATION MEDICINE, TRAUMA MANAGEMENT, DIABETES & ENDOCRINOLOGY, EPIDEMIOLOGY, HEALTH SERVICES ADMINISTRATION & MANAGEMENT, PUBLIC HEALTH                                                                                                                                                                                                                                                                                                                                                                                                                                                                                                                                    |
|                                 |                                                                                                                                                                                                                                                                                                                                                                                                                                                                                                                                                                                                                                                                                   |

SCHOLARONE™  
Manuscripts

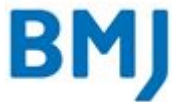

I, the Submitting Author has the right to grant and does grant on behalf of all authors of the Work (as defined in the below author licence), an exclusive licence and/or a non-exclusive licence for contributions from authors who are: i) UK Crown employees; ii) where BMJ has agreed a CC-BY licence shall apply, and/or iii) in accordance with the terms applicable for US Federal Government officers or employees acting as part of their official duties; on a worldwide, perpetual, irrevocable, royalty-free basis to BMJ Publishing Group Ltd ("BMJ") its licensees and where the relevant Journal is co-owned by BMJ to the co-owners of the Journal, to publish the Work in this journal and any other BMJ products and to exploit all rights, as set out in our [licence](#).

The Submitting Author accepts and understands that any supply made under these terms is made by BMJ to the Submitting Author unless you are acting as an employee on behalf of your employer or a postgraduate student of an affiliated institution which is paying any applicable article publishing charge ("APC") for Open Access articles. Where the Submitting Author wishes to make the Work available on an Open Access basis (and intends to pay the relevant APC), the terms of reuse of such Open Access shall be governed by a Creative Commons licence – details of these licences and which [Creative Commons](#) licence will apply to this Work are set out in our licence referred to above.

Other than as permitted in any relevant BMJ Author's Self Archiving Policies, I confirm this Work has not been accepted for publication elsewhere, is not being considered for publication elsewhere and does not duplicate material already published. I confirm all authors consent to publication of this Work and authorise the granting of this licence.

1  
2  
3 1 TITLE  
4

---

5 2 Retrospective observational study of characteristics of persons with amputations accessing  
6 3 International Committee of the Red Cross (ICRC) rehabilitation centres in five conflict and  
7 4 post-conflict countries  
8  
9  
10 5

11  
12 6 AUTHORS  
13

---

14 7 Corresponding author

15 8 Barth, Cornelia Anne

16 9 University College Dublin, School of Public Health, Physiotherapy and Sports Science

17 10 Dublin

18 11 Ireland

19 12 e-mail address c.a.barth@gmx.net

20 13 telephone +41 78 645 8919

21 14 Co-authors

22 15 Wladis, Andreas

23 16 Linköping University, Department of Biomedical and Clinical Sciences

24 17 Linköping

25 18 Sweden

26 19 Blake, Catherine

27 20 University College Dublin, School of Public Health, Physiotherapy and Sports Science

28 21 Dublin

29 22 Ireland

30 23 Bhandarkar, Prashant

31 24 WHO Collaborating Centre (WHOCC) for Research in Surgical Needs in LMICs, BARC

32 25 Hospital

33 26 Mumbai, Maharashtra, 400094

34 27 India

35 28 2<sup>nd</sup> affiliation

36 29 Tata Institute of Social Sciences School of Health Systems Studies,

37 30 Deonar, Maharashtra

38 31 India

39 32 Aebischer Perone, Sigiriya

40 33 International Committee of the Red Cross, Health unit,

41 34 Geneva

42 35 Switzerland

43 36 O'Sullivan, Cliona

44 37 University College Dublin, School of Public Health, Physiotherapy and Sports Science

45 38 Dublin

46 39 Ireland

47 40  
48  
49  
50  
51  
52  
53  
54  
55  
56  
57  
58  
59  
60



1  
2  
3 1 TITLE  
4

---

5 2 Retrospective observational study of characteristics of persons with amputations accessing  
6 3 International Committee of the Red Cross (ICRC) rehabilitation centres in five conflict and  
7 4 post-conflict countries

8  
9  
10 5 ABSTRACT  
11

---

12 6 **Objectives:** Limb amputation incidence is particularly high in fragile contexts due to conflict,  
13 7 accidents and poorly managed diabetes. The study aim was to analyse i) demographic and  
14 8 amputation characteristics of persons with any type of acquired amputation (PwA) and ii)  
15 9 time between amputation and first access to rehabilitation in five countries.

16  
17  
18 10 **Design:** A retrospective, observational study analyzing differences in demographic and  
19 11 clinical factors and time to access rehabilitation between users with traumatic and non-  
20 12 traumatic amputations.

21  
22  
23 13 **Setting:** Five countries with the highest numbers of PwA in the global ICRC database  
24 14 (Afghanistan, Cambodia, Iraq, Myanmar, Sudan). Cleaned and merged data from 2009-2018  
25 15 were aggregated by sex; age at amputation and registration; cause, combination and  
26 16 anatomical level of amputation(s); living environment.

27  
28  
29 17 **Participants:** all PwA newly attending rehabilitation.

30  
31 18 **Results:** Data for 28446 individuals were included (4329 [15.2%] female). Most were  
32 19 traumatic amputations (73.4%, 20890); of these, 48.6% (13801) were conflict related.  
33 20 Average age at traumatic amputation for men and women was 26.9 and 24.1 years  
34 21 respectively; for non-traumatic amputation it was 49.1 years and 45.9 years respectively. Sex  
35 22 differences in age were statistically significant for traumatic and non-traumatic causes  
36 23 ( $p<0.001$ ,  $p=0.003$ ). Delay between amputation and rehabilitation was on average 8.2 years  
37 24 for those with traumatic amputation, significantly higher than an average 3 years for those  
38 25 with non-traumatic amputation ( $p<0.001$ ).

39  
40  
41 26 **Conclusions:** Young age for traumatic and non-traumatic amputations indicates the  
42 27 devastating impact of war and fragile health systems on a society. Long delays between  
43 28 amputation and rehabilitation reveal the mismatch of needs and resources. For  
44 29 rehabilitation service providers in fragile settings, it is an enormous task to manage the  
45 30 diversity of PwA of various causes, age, sex and additional conditions. Improved  
46 31 collaboration between primary healthcare, surgical and rehabilitation services, a  
47 32 prioritisation of rehabilitation and increased resource provision are recommended to ensure  
48 33 comprehensive care for PwA.  
49  
50  
51  
52  
53  
54  
55  
56  
57  
58  
59  
60

1  
2  
3 1 STRENGTHS AND LIMITATIONS OF THIS STUDY  
4

---

- 5 2 • To our knowledge, this is the first large multi-country study on a highly vulnerable and  
6 3 neglected group of persons with amputations seeking rehabilitation in contexts of  
7 4 conflict and post conflict.  
8 5 • Data originate from exceptionally challenging and diverse settings where providing  
9 6 rehabilitation and collecting data is complex and constantly challenged by the volatility  
10 7 of the environment.  
11 8 • Limitations include that data are derived from ICRC supported structures only and  
12 9 cannot make statements on overall population or on persons not attending services  
13  
14  
15  
16  
17  
18  
19

20 12 KEYWORDS

---

21 13 Rehabilitation  
22 14 Armed Conflicts  
23 15 Amputation  
24 16 Delivery of Health Care  
25 17 Diabetes Complications  
26  
27  
28  
29

30 20 WORD COUNT

---

31  
32 21 3961  
33  
34 22  
35  
36  
37  
38  
39  
40  
41  
42  
43  
44  
45  
46  
47  
48  
49  
50  
51  
52  
53  
54  
55  
56  
57  
58  
59  
60

## 1 INTRODUCTION

---

2 Limb amputation is a life-changing event. Global incidence studies reveal a substantial lack of  
3 data from fragile contexts such as conflict-affected or low- and middle-income countries  
4 (LMICs), but research has shown that amputation incidence is higher in populations with low  
5 economic and educational status. This results in limited access to healthcare, even in high  
6 income countries (HIC).<sup>1-3</sup> People in fragile contexts are particularly at risk of amputation  
7 and many of them will have to cope without prosthetic care.<sup>4,5</sup> Appropriate rehabilitation  
8 and assistive technology (AT) have the potential to greatly diminish disability and allow the  
9 person to lead an independent, functional life. It requires the availability of comprehensive,  
10 costly and lifelong services, which is an enormous challenge in such environments.

11 Rehabilitation services should span from early physiotherapy to prosthetic fitting,  
12 psychosocial support and social reintegration measures. A lower extremity amputation (LEA)  
13 requires prosthetic renewal every three years, for children every six months.<sup>6</sup>

14 The World Health Assembly's 2018 resolution on improving access to AT and the 2021  
15 resolution on the highest attainable standard of health for persons with disabilities indicate  
16 the many shortcomings and the need for increased recognition in this field.<sup>5,7</sup>

17 Access to appropriate rehabilitation and AT as a human right is integral to the Convention on  
18 the Rights of Persons with Disabilities, a fact that resulted in publications discussing  
19 implications, implementation and sobering reality-checks in numerous LMICs.<sup>8-13</sup>

20 Alarming needs and low supply are a well-known reality for global actors playing a key role in  
21 advocating for and providing rehabilitation in fragile settings including the International  
22 Committee of the Red Cross (ICRC), Humanity and Inclusion and the World Health  
23 Organisation (WHO). Guidelines, training resources and advocacy papers by such actors,  
24 often issued collectively, are specifically pointing out the importance and interdependence  
25 of early rehabilitation, AT and rehabilitation across the continuum of care.<sup>14-19</sup>

26 As such initiatives address knowledge gaps in this neglected field, their global  
27 implementation lags behind, even more so in countries of prolonged conflict or post-conflict  
28 with fragile health systems and a deprioritisation of rehabilitation services. As a  
29 consequence, there remains a lack of scientific papers on which to base further guideline  
30 development and research. This starts with affected populations in the countries themselves  
31 who remain largely unknown, contrary to the well-studied veterans from HIC who sustained  
32 conflict-related amputations abroad.<sup>20-22</sup> Complex traumatic amputations and their sequelae  
33 in conflict- and mine-affected areas are known to be a huge challenge.<sup>4,23,24</sup> Adding to this,  
34 and with profound consequences, is the increasing global burden of type two diabetes  
35 mellitus (T2D).<sup>25</sup>

36 Overstretched health systems, particularly in LMIC, lacking access to basic diabetic care and  
37 high rates of undiagnosed T2D increase the risk and incidence of amputations.<sup>26</sup> Road traffic  
38 (RTA) and other accidents are an additional problem in countries with limited traffic and  
39 occupational safety standards.<sup>27</sup>

40 Persons with amputations (PwA) constitute the biggest cohort of users accessing  
41 rehabilitation services supported by the ICRC in conflict and post-conflict states.<sup>28</sup> Assisting  
42 conflict affected populations is at the centre of the ICRC's humanitarian mission and serving  
43 mine victims with limb loss is a core activity since the launch of its physical rehabilitation  
44 programme (PRP) in 1979.<sup>29,30</sup>

1  
2  
3 1 Currently, the ICRC supports 152 rehabilitation structures in 35 countries offering  
4 2 multidisciplinary rehabilitation services for persons with physical disabilities and capacity  
5 3 building for rehabilitation workforce. With this support, 62172 persons worldwide were  
6 4 fitted with prostheses in 2019.<sup>29</sup> There is very little information on the characteristics of PwA  
7 5 accessing rehabilitation in fragile contexts.

8 6 The overall aim of this study was to analyse characteristics of PwA accessing rehabilitation  
9 7 services in five ICRC contexts in 2009-2018 to better understand the needs and deduce  
10 8 implications for service provision. Specific aims were to explore differences in sex and age at  
11 9 amputation, at registration for rehabilitation, time between amputation and registration  
12 10 (delay), causes and characteristics of amputations.

## 13 METHODS

---

### 14 **Design and setting**

15 This retrospective observational study is an analysis of aggregated data. It reflects the  
16 records of all PwA registered from 2009 to 2018 in ICRC-supported physical rehabilitation  
17 centres (PRCs) in Afghanistan (n=7), Cambodia (n=2), Iraq (n=1), Myanmar (n= 5), and Sudan  
18 (n= 2). Data were extracted from an ICRC-developed electronic database described in a  
19 previous study.<sup>28</sup> The five countries representing the highest numbers of PwA attending  
20 PRCs were selected for this study, reflecting 92% of the total number of PwA in the  
21 database. Besides post-conflict Cambodia, the countries represent contexts of protracted  
22 crises and are classified by the World Bank as low-income (Afghanistan, Sudan), LMIC  
23 (Cambodia, Myanmar), or upper middle-income (Iraq).<sup>31,32</sup> These differences are equally  
24 reflected in other indicators as available from open source sites by the United Nations  
25 Development Programme and the WHO.<sup>33,34</sup>

26 Data reflect representative user populations in the studied countries to varying degrees  
27 depending on presence of other rehabilitation providers, or data management difficulties.  
28 All PRCs were located in urban areas.

### 29 **Participants**

30 Participants include all persons with any type of acquired amputation newly attending for  
31 prosthetic fitting. Excluded were persons attending with congenital limb loss.

### 32 **Data collection and management**

33 Upon registration, demographic and clinical characteristics were captured as part of routine  
34 documentation. The variables retrieved from the database were: country, sex, age at  
35 registration and at amputation, living environment, cause, anatomic level and number of  
36 amputation(s). PwA's living environment was subject to local definitions of the terms urban  
37 or rural. The quantitative variables were cleaned, merged, disaggregated by sex and age and  
38 organized into variables of interest.

39 Figure 1 lists the causes as retrieved from the database and shows how causes were  
40 categorised into traumatic or non-traumatic. Traumatic causes were further sub-categorised  
41 as non-conflict- or conflict-related. We examined non-conflict-related traumatic causes by  
42  
43

1  
2  
3 1 accidental such as RTA or non-accidental causes such as animal bite. Conflict-related causes  
4 2 were separated into caused by weapons or by weapon-contamination, which encompasses  
5 3 the presence of mines, explosive remnants of war (ERW) and other sources of  
6 4 contamination.<sup>35</sup>

7 5 The database offered four labels for non-traumatic causes: cancerous, infectious, metabolic,  
8 6 or vascular. For analysis, these were merged, except cancer (merged with 'other'), and  
9 7 considered related to non-communicable diseases (NCD), potentially T2D.

10 8 For amputation characteristics, male and female PwA were counted by combinations of LEA  
11 9 and upper extremity amputations (UAE) and by non-traumatic versus traumatic causes. We  
12 10 distinguished six levels of UEA and six levels of LEA counting number of amputations (and  
13 11 not persons) per level.  
14 12

### 13 13 **Data analysis**

14 14 The delay between amputation and registration to rehabilitation was calculated by  
15 15 subtracting the self-reported amputation date from the registration date as noted on the  
16 16 user file.

17 17 Age at registration was grouped into young child: under 5; child: 5–17; young adult: 18–34;  
18 18 adult: 35–59; older adult: over 60. Besides 'living environment' all selected variables were  
19 19 mandatory for data entry. Where software issues led to missing data, these were labelled  
20 20 'no data' in the tables.

21 21 Data analysis comprised of descriptive statistics. The software packages used were Microsoft  
22 22 Office Excel 2016, R (version 3.6.1), R Studio for windows (version 1.2.5001) and SPSS (IBM  
23 23 SPSS Statistics for Windows, Version 24.0. Armonk, NY: IBM Corp). Categorical data were  
24 24 summarised as counts and percentages across rows (sex) and columns (groups). Age at the  
25 25 time of amputation, registration and delay intervals were presented as means with 95%  
26 26 confidence intervals. Differences between groups were assessed using Chi Square and  
27 27 Mann-Whitney U tests. P values below 0.05 were considered statistically significant.  
28 28

### 29 29 **Potential bias**

30 30 Data depended on the accuracy of self-report and recording of observations and  
31 31 assessments by PRC staff with varying professional training and subject to interpretation,  
32 32 hereby presenting potential biases. Variables such as sex and age are deemed robust.

33 33 Challenges exist when recording the cause of non-traumatic amputation presentations as  
34 34 PRCs are rarely attached to a medical service to diagnose underlying conditions.

35 35 Unless a PwA checks in with externally confirmed T2D diagnosis, PRC staff rely on findings  
36 36 from their own assessment. They record non-traumatic causes as predefined in the  
37 37 database, which does not offer T2D as a stand-alone variable, but 'infectious', 'metabolic' or  
38 38 'vascular' presentations. Chronic, often unknown health conditions in the studied countries  
39 39 lead to such presentations defined by PRC staff as amputation cause and are most likely  
40 40 related to NCD/T2D.<sup>36–38</sup> Considering the dimension and consequences of T2D prevalence  
41 41 we merged causes under this heading despite absence of confirmed diagnosis.  
42 42

### 43 43 **Ethical approval and data sharing**

44 44 Ethical exemption to conduct analysis on de-identified data was granted by the Swiss Ethics  
45 45 Committee Geneva [Reference number: REQ-2019-00027]. Data sharing agreements

1  
2  
3 1 between the ICRC, Linköping University and University College Dublin were approved by  
4 2 each institution.  
5  
6 3

#### 7 4 **Patient and public involvement**

8 5 For this retrospective study of routinely collected data, patient involvement in study design  
9 6 did not apply. However, consultation with key stakeholders (PRC managers and personnel  
10 7 and ICRC expatriate staff) was conducted regarding study design and feasibility and  
11 8 contextual analysis of findings. Interpretation of the data was based on these stakeholders'  
12 9 profound understanding of the respective contexts. The main author presented and  
13 10 discussed preliminary research results in an ongoing process, online and in person during  
14 11 project visits where involved rehabilitation providers did and will continue to play an active  
15 12 role in dissemination of the findings of this research.  
16 13

17 14 The methods used and findings from the study are reported in line with the GATHER  
18 15 guidelines.<sup>39</sup>  
19 16  
20 17

## 21 18 **RESULTS**

---

### 22 19 **PwA characteristics**

23 20 A total of 28446 individual user files were analysed with 4329 (15.2%) female PwA. Most  
24 21 data relate to Afghanistan (12364 [43.5%]), followed by Myanmar (5267 [18.5%]), Sudan  
25 22 (5012 [17.6%]), Iraq (3491 [12.3%]), and Cambodia (2312 [8.1%]).  
26 23

### 27 24 **Age at time of amputation, age at registration, delay between amputation and registration**

28 25 Average age for traumatic amputation was 26.9 years in male, 24.1 years in female. For non-  
29 26 traumatic amputation it was 49.1 years in male, 45.9 years in female PwA. Average delay  
30 27 was significantly shorter in the non-traumatic group with 3 years compared to 8.2 years for  
31 28 those with traumatic amputation, (Table 1, Figure 2). In all countries, delay was lowest in  
32 29 young children (0.0–2.5 years) and highest for males over 60 with traumatic amputations  
33 30 (16.6–22.5 years), except for Afghanistan (10.5 years for males aged 35–59 and 10.3 years  
34 31 for those over 60).  
35 32  
36  
37  
38  
39  
40  
41  
42  
43  
44  
45  
46  
47  
48  
49  
50  
51  
52  
53  
54  
55  
56  
57  
58  
59  
60

1 Table 1. Age at time of amputation, age at registration, delay between amputation and registration

| Country   Variables                                 | Non-Traumatic Amputation |                  |          | Traumatic Amputation |                 |          | Total – by cause |                 |                   |           |
|-----------------------------------------------------|--------------------------|------------------|----------|----------------------|-----------------|----------|------------------|-----------------|-------------------|-----------|
|                                                     | Male                     | Female           | P value† | Male                 | Female          | P value† | Non-Trauma       | Trauma          | MD (95% CI)       | P value†† |
| Total                                               | Mean (95% CI)            |                  |          | Mean (95% CI)        |                 |          | Mean (95% CI)    |                 |                   |           |
| Age at amputation                                   | 49.1(48.6-49.6)          | 45.9(45.1-46.7)  | <0.001   | 26.9(26.7-27.1)      | 24.1(23.3-24.8) | <0.001   | 48.2(47.8-48.6)  | 26.6(26.4-26.8) | 21.7(21.3-22.1)   | <0.001    |
| Age at registration                                 | 52.2(51.8-52.7)          | 48.6(47.8-49.4)  | <0.001   | 35.2(35-35.4)        | 31.6(30.9-32.3) | <0.001   | 51.2(50.8-51.6)  | 34.8(34.6-35)   | 16.4(16.0-16.9)   | <0.001    |
| Delay all PwAs (y)                                  | 3.2(3.0-3.4)             | 2.7(2.4-3)       | 0.009    | 8.3(8.1-8.4)         | 7.5(7.1-8)      | 0.119    | 3.0(2.9-3.2)     | 8.2(8-8.3)      | -5.1(-5.4-4.9)    | <0.001    |
| <b>Delay by PwA age group (age at registration)</b> |                          |                  |          |                      |                 |          |                  |                 |                   |           |
| Young child (<5 y)                                  | 0.9(0.4-1.4)             | 1.3(0.8-1.8)     | 0.200    | 0.9(0.7-1.1)         | 1.0 (0.7-1.2)   | 0.745    | 1.1(0.7-1.4)     | 0.9(0.8-1.1)    | 0.1(-0.3-0.6)     | 0.327     |
| Child (5-17 y)                                      | 2.2(1.6-2.8)             | 2.2(1.5-2.8)     | 0.563    | 2.0 (1.9-2.2)        | 3.9(3.5-4.3)    | <0.001   | 2.2(1.8-2.6)     | 2.4(2.3-2.6)    | -0.3(-0.7-0.2)    | 0.092     |
| Young Adult (18-34 y)                               | 3.2(2.8-3.6)             | 3.1(2.5-3.7)     | 0.987    | 3.8(3.6-3.9)         | 7.2(6.6-7.8)    | <0.001   | 3.1(2.8-3.5)     | 4.1(3.9-4.2)    | -0.9(-1.3-0.5)    | 0.002     |
| Adult (35-59 y)                                     | 2.9(2.7-3.2)             | 2.6(2.1-3)       | 0.022    | 13.7(13.4-14)        | 9.9(9-10.8)     | <0.001   | 2.8(2.6-3.1)     | 13.3(13.1-13.6) | -10.5(-10.9-10.1) | <0.001    |
| Older Adult (>60 y)                                 | 3.5(3.1-3.9)             | 3(2.3-3.7)       | 0.071    | 16.9(16-17.7)        | 12.1(9.9-14.4)  | <0.001   | 3.4(3.1-3.7)     | 16.3(15.5-17.1) | -12.9(-13.7-12.2) | <0.001    |
| <b>Afghanistan</b>                                  |                          |                  |          |                      |                 |          |                  |                 |                   |           |
| Age at amputation                                   | 48.8(46.2-51.4)          | 42.7(39.4-46)    | <0.001   | 24.8(24.3-25.3)      | 20.6(19.4-21.8) | <0.001   | 46.8(44.8-48.9)  | 24.3(23.9-24.8) | 22.5(21.7-23.2)   | <0.001    |
| Age at registration                                 | 50.3(49.2-51.3)          | 44.0 (42.5-45.4) | <0.001   | 29.7(29.4-30)        | 26.6(25.6-27.6) | <0.001   | 48.3(47.4-49.1)  | 29.4(29.1-29.7) | 18.9(18.1-19.6)   | <0.001    |
| Delay all PwAs (y)                                  | 1.6(1.3-1.9)             | 1.3(1.0-1.6)     | 0.318    | 4.9(4.8-5.1)         | 6.0 (5.5-6.6)   | <0.001   | 1.5(1.2-1.7)     | 5.0 (4.9-5.2)   | -3.6(-4.0-3.2)    | <0.001    |
| <b>Delay by PwA age group (age at registration)</b> |                          |                  |          |                      |                 |          |                  |                 |                   |           |
| Young child (<5 y)                                  | 0.5(-0.2-1.2)            | 1.3(0.3-2.2)     | 0.214    | 0.9(0.6-1.1)         | 0.9(0.6-1.2)    | 0.829    | 0.8(0.2-1.3)     | 0.9(0.7-1.1)    | -0.1(-0.8-0.5)    | 0.618     |
| Child (5-17 y)                                      | 1.1(0.6-1.7)             | 1.6(0.8-2.4)     | 0.948    | 1.8(1.6-2.0)         | 3.9(3.4-4.4)    | <0.001   | 1.3(0.9-1.8)     | 2.2(2.1-2.4)    | -0.9(-1.5-0.3)    | <0.001    |
| Young Adult (18-34 y)                               | 3.0(2.2-3.8)             | 2.1(1.2-2.9)     | 0.827    | 3.1(2.9-3.2)         | 7.8(6.9-8.7)    | <0.001   | 2.7(2.0-3.3)     | 3.4(3.2-3.5)    | -0.7(-1.4-0.1)    | <0.001    |
| Adult (35-59 y)                                     | 1.4(0.9-1.9)             | 1(0.6-1.4)       | 0.551    | 10.5(10.0-11.0)      | 7.6(6.2-9.0)    | <0.001   | 1.2(0.9-1.6)     | 10.1(9.7-10.6)  | -8.9(-9.8-8.0)    | <0.001    |
| Older Adult (>60 y)                                 | 1.3(0.7-1.8)             | 1.1(0.3-1.9)     | 0.781    | 10.3(9.1-11.6)       | 4.6(2.3-6.8)    | 0.004    | 1.2(0.8-1.7)     | 9.7(8.5-10.9)   | -8.5(-9.6-7.4)    | <0.001    |
| <b>Cambodia</b>                                     |                          |                  |          |                      |                 |          |                  |                 |                   |           |
| Age at amputation                                   | 46(38.5-53.6)            | 41.6(31.1-52.0)  | 0.189    | 28.6(27.2-29.9)      | 31.3(27.3-35.3) | 0.100    | 44.7(38.6-50.8)  | 28.9(27.6-30.2) | 15.8(13.7-17.9)   | <0.001    |
| Age at registration                                 | 48.9(45.9-51.9)          | 45.3(40.3-50.3)  | 0.235    | 42.7(42.0-43.3)      | 40.3(38-42.7)   | 0.006    | 47.8(45.2-50.4)  | 42.4(41.8-43.0) | 5.4(3.2-7.6)      | <0.001    |
| Delay all PwAs (y)                                  | 2.9(1.8-4.0)             | 3.8(1.5-6.1)     | 0.285    | 14.0 (13.4-14.6)     | 9.3(7.8-10.8)   | <0.001   | 3.2(2.2-4.2)     | 13.4(12.9-14.0) | -10.2(-12.0-8.5)  | <0.001    |
| <b>Delay by PwA age group (age at registration)</b> |                          |                  |          |                      |                 |          |                  |                 |                   |           |
| Young child (<5 y)                                  | 2.5(1.5-3.5)##           | ..               | ..       | 1.0 (0.2-1.8)        | 0.0(0.0-0.0)##  | 0.267    | 2.5(1.5-3.5)     | 0.7(0.0-1.3)    | 1.8(0.2-3.4)      | 0.071     |
| Child (5-17 y)                                      | 9.5(-5.2-24.2)           | 4.6(0.4-8.7)     | 0.500    | 3.1(1.7-4.4)         | 3.7(1.3-6.2)    | 0.685    | 5.7(1.4-9.9)     | 3.2(2.1-4.4)    | 2.4(-1.2-6.0)     | 0.115     |
| Young Adult (18-34 y)                               | 4.3(2.0-6.6)             | 3.9(-0.1-7.8)    | 0.991    | 4.7(4.1-5.3)         | 6.2(4.2-8.1)    | 0.938    | 4.2(2.2-6.1)     | 4.9(4.3-5.5)    | -0.7(-2.9-1.5)    | 0.470     |
| Adult (35-59 y)                                     | 3.2(1.2-5.1)             | 3.1(0.4-5.8)     | 0.213    | 18.6(17.9-19.3)      | 10.9(8.7-13.2)  | <0.001   | 3.1(1.5-4.8)     | 17.9(17.2-18.5) | -14.7(-17.2-12.2) | <0.001    |
| Older Adult (>60 y)                                 | 1.2(0.0-3.2)             | 4.3(-1.9-10.6)   | 0.785    | 19.7(17.7-21.7)      | 15.2(9.9-20.5)  | 0.021    | 2.1(0.1-4.1)     | 18.9(17-20.8)   | -16.8(-20.5-13.1) | <0.001    |
| <b>Iraq</b>                                         |                          |                  |          |                      |                 |          |                  |                 |                   |           |
| Age at amputation                                   | 54.4(50.7-58.2)          | 53.9(48-59.9)    | 0.826    | 26.8(25.7-28.0)      | 25.6(22.2-29.0) | 0.023    | 54.3(51.2-57.5)  | 26.7(25.6-27.8) | 27.6(26.6-28.6)   | <0.001    |
| Age at registration                                 | 56.6(55.7-57.6)          | 55.3(53.5-57.1)  | 0.541    | 39.1(38.5-39.8)      | 33.6(31.3-35.8) | <0.001   | 56.3(55.4-57.1)  | 38.6(38-39.2)   | 17.7(16.6-18.7)   | <0.001    |
| Delay all PwAs (y)                                  | 2.2(1.8-2.7)             | 1.7(1-2.3)       | 0.007    | 12.3(11.8-12.8)      | 8.1(6.7-9.6)    | <0.001   | 2.1(1.7-2.4)     | 11.9(11.5-12.4) | -9.9(-10.6-9.1)   | <0.001    |
| <b>Delay by PwA age group (age at registration)</b> |                          |                  |          |                      |                 |          |                  |                 |                   |           |
| Young child (<5 y)                                  | 0.0(0.0-0.0)#            | 2.0(2.0-2.0)##   | 1.000    | 1.0 (0.4-1.6)        | 1.0(0.1-1.9)    | 0.961    | 1.0(-1.0-3.0)    | 1.0(0.5-1.5)    | 0(-1.7-1.7)       | 1.000     |
| Child (5-17 y)                                      | 4.1(1.2-7.1)             | 2.1(0-4.2)       | 0.285    | 2.9(2.2-3.5)         | 2.6(1.4-3.8)    | 0.756    | 3.1(1.3-5.0)     | 2.8(2.2-3.4)    | 0.3(-1.3-1.9)     | 0.316     |
| Young Adult (18-34 y)                               | 3.8(1.8-5.7)             | 1.3(0.2-2.3)     | 0.044    | 5.7(5.2-6.2)         | 7.6(5.5-9.7)    | 0.595    | 3.0(1.6-4.4)     | 5.9(5.4-6.3)    | -2.8(-4.7-1.0)    | <0.001    |

|  |                                                     |                           |                           |        |                             |                              |        |                 |                 |                   |        |
|--|-----------------------------------------------------|---------------------------|---------------------------|--------|-----------------------------|------------------------------|--------|-----------------|-----------------|-------------------|--------|
|  | Adult (35-59 y)                                     | 2.0(1.5-2.6)              | 1.4(0.7-2.1)              | 0.268  | 16.7(16-17.4)               | 11.0(8.1-13.9)               | <0.001 | 1.9(1.4-2.3)    | 16.3(15.6-17.0) | -14.4(-15.5-13.3) | <0.001 |
|  | Older Adult (>60 y)                                 | 2.2(1.5-2.8)              | 1.9(0.8-3.0)              | 0.043  | 21.2(19.1-23.2)             | 10.9(5.2-16.5)               | 0.008  | 2.1(1.6-2.7)    | 20.4(18.4-22.4) | -18.3(-19.8-16.8) | <0.001 |
|  | <b>Myanmar</b>                                      |                           |                           |        |                             |                              |        |                 |                 |                   |        |
|  | Age at amputation                                   | 46.7(43.7-49.8)           | 47.4(42.2-52.7)           | 0.069  | 29.6(28.6-30.5)             | 28.0 (25-31.1)               | 0.015  | 46.9(44.3-49.5) | 29.4(28.5-30.3) | 17.5(16.6-18.3)   | <0.001 |
|  | Age at registration                                 | 52.0(51.0-52.9)           | 51.8(50-53.6)             | 0.615  | 40.7(40.3-41.2)             | 38.3(36.6-40)                | 0.006  | 51.9(51.1-52.8) | 40.5(40.1-40.9) | 11.4(10.5-12.3)   | <0.001 |
|  | Delay all PwAs (y)                                  | 5.3(4.8-5.8)              | 4.3(3.4-5.3)              | <.001  | 11.2(10.8-11.5)             | 10.3(9.0-11.6)               | 0.007  | 5.0 (4.6-5.5)   | 11.1(10.8-11.5) | -6.1(-6.7-5.4)    | <0.001 |
|  | <b>Delay by PwA age group (age at registration)</b> |                           |                           |        |                             |                              |        |                 |                 |                   |        |
|  | Young child (<5 y)                                  | 1.0(1.0-1.0) <sup>#</sup> | 2.0(2.0-2.0) <sup>#</sup> | 1.000  | 2.0 (2.0-2.0) <sup>##</sup> | 2.5(1.0.5-3.5) <sup>##</sup> | 0.667  | 1.5(0.5-2.5)    | 2.3(1.8-2.7)    | -0.8(-2.1-0.6)    | 0.267  |
|  | Child (5-17 y)                                      | 4.5(2.3-6.7)              | 5.6(3.0-8.2)              | 0.879  | 2.4(1.8-3.1)                | 3.9(2.5-5.3)                 | 0.073  | 5.1(3.4-6.9)    | 2.8(2.2-3.4)    | 2.3(0.8-3.8)      | 0.010  |
|  | Young Adult (18-34 y)                               | 2.6(2.0-3.2)              | 2.5(0.9-4.0)              | 0.278  | 4.5(4.2-4.8)                | 6.1(4.6-7.5)                 | 0.713  | 2.6(2-3.2.0)    | 4.6(4.3-4.9)    | -2(-3.0-1.1)      | 0.001  |
|  | Adult (35-59 y)                                     | 4.7(4.1-5.3)              | 4.3(2.9-5.6)              | 0.001  | 13.9(13.5-14.4)             | 13.1(11.0-15.1)              | 0.092  | 4.6(4.0-5.2)    | 13.9(13.4-14.3) | -9.3(-10.2-8.4)   | <0.001 |
|  | Older Adult (>60 y)                                 | 7.3(6.0-8.5)              | 4.8(2.8-6.8)              | 0.014  | 22.5(20.9-24.1)             | 19.3(13.2-25.3)              | 0.072  | 6.7(5.6-7.7)    | 22.2(20.7-23.8) | -15.6(-17.4-13.7) | <0.001 |
|  | <b>Sudan</b>                                        |                           |                           |        |                             |                              |        |                 |                 |                   |        |
|  | Age at amputation                                   | 48.5(46.5-50.5)           | 45(41.8-48.2)             | <0.001 | 30.5(29.1-32)               | 25.9(23.1-28.6)              | <0.001 | 47.6(45.9-49.3) | 29.7(28.4-31.1) | 17.9(16.9-18.9)   | <0.001 |
|  | Age at registration                                 | 52.1(51.4-52.7)           | 48.7(47.4-50)             | <0.001 | 39.7(38.9-40.5)             | 34(32.2-35.9)                | <0.001 | 51.2(50.6-51.8) | 38.7(38.0-39.5) | 12.5(11.5-13.4)   | <0.001 |
|  | Delay all PwAs (y)                                  | 3.6(3.3-4.0)              | 3.7(3.1-4.3)              | 0.053  | 9.2(8.7-9.8)                | 8.2(7.1-9.3)                 | 0.525  | 3.6(3.3-3.9)    | 9.1(8.6-9.6)    | -5.4(-6.0-4.9)    | <0.001 |
|  | <b>Delay by PwA age group (age at registration)</b> |                           |                           |        |                             |                              |        |                 |                 |                   |        |
|  | Young child (<5 y)                                  | 1.0(0.5-1.5)              | 1.2(0.4-2.0)              | 0.699  | 0.8(0.2-1.5)                | 1.3(0.4-2.3)                 | 0.385  | 1.1(0.6-1.5)    | 1.0 (0.5-1.5)   | 0.1(-0.7-0.9)     | 0.545  |
|  | Child (5-17 y)                                      | 2.7(1.6-3.7)              | 1.1(0.6-1.7)              | 0.117  | 2.9(2.2-3.6)                | 4.6(3.5-5.7)                 | 0.004  | 2.1(1.4-2.8)    | 3.4(2.8-4)      | -1.4(-2.3-0.4)    | 0.005  |
|  | Young Adult (18-34 y)                               | 3.3(2.7-3.9)              | 4.3(3.2-5.4)              | 0.004  | 5.2(4.7-5.7)                | 6.9(5.6-8.2)                 | 0.013  | 3.6(3.0-4.1)    | 5.6(5.1-6)      | -2(-2.7-1.3)      | <0.001 |
|  | Adult (35-59 y)                                     | 3.1(2.7-3.5)              | 3.4(2.7-4.2)              | 0.064  | 11.3(10.5-12.2)             | 9.6(7.4-11.9)                | 0.047  | 3.2(2.8-3.6)    | 11.1(10.3-11.9) | -7.9(-8.7-7.1)    | <0.001 |
|  | Older Adult (>60 y)                                 | 4.4(3.7-5.2)              | 4.1(2.8-5.4)              | 0.653  | 16.6(14.1-19.1)             | 15.1(9.3-20.9)               | 0.656  | 4.4(3.7-5)      | 16.4(14.1-18.7) | -12(-13.8-10.3)   | <0.001 |

Values are mean with 95% Confidence Interval (Mean (95% CI)). MD = Mean Difference between non-traumatic and non-traumatic values.

† Mann-Whitney U test between male and female participants

†† Mann-Whitney U test between participants with non-traumatic and traumatic amputation

y = years

# 1 participant; ## 2 participants



1 **Table 2. Distribution by sex and age of persons presenting with traumatic and non-traumatic amputations**

| Country            | Age Group             | Non-Traumatic Amputation |                      | Traumatic Amputation  |                      | Ratio traumatic:1 non-traumatic amputation | P value† | Total                 |                      | Grand Total  |
|--------------------|-----------------------|--------------------------|----------------------|-----------------------|----------------------|--------------------------------------------|----------|-----------------------|----------------------|--------------|
|                    |                       | Male N(R% C%)            | Female N(R% C%)      | Male N(R% C%)         | Female N(R% C%)      |                                            |          | Male N(R% C%)         | Female N(R% C%)      |              |
| <b>Overall</b>     | <b>Total</b>          | <b>5481(72.5 ..)</b>     | <b>2075(27.5 ..)</b> | <b>18636(89.2 ..)</b> | <b>2254(10.8 ..)</b> | 2.76                                       | <0.001   | <b>24117(84.8 ..)</b> | <b>4329(15.2 ..)</b> | <b>28446</b> |
|                    | Young Child (<5 y)    | 19(57.6 0.3)             | 14(42.4 0.7)         | 99(58.9 0.5)          | 69(41.1 3.1)         | 5.09                                       | 0.885    | 118(58.7 0.5)         | 83(41.3 1.9)         | 201(0.7)     |
|                    | Child (5-17 y)        | 168(54.2 3.1)            | 142(45.8 6.8)        | 1748(77.8 9.4)        | 500(22.2 22.2)       | 7.25                                       | <0.001   | 1916(74.9 7.9)        | 642(25.1 14.8)       | 2558(9.0)    |
|                    | Young Adult (18-34 y) | 753(70.6 13.7)           | 314(29.4 15.1)       | 8373(91.3 44.9)       | 799(8.7 35.4)        | 8.60                                       | <0.001   | 9126(89.1 37.8)       | 1113(10.9 25.7)      | 10239(36)    |
|                    | Adult (35-59 y)       | 2433(72.0 44.4)          | 948(28.0 45.7)       | 7047(90.8 37.8)       | 711(9.2 31.5)        | 2.29                                       | <0.001   | 9480(85.1 39.3)       | 1659(14.9 38.3)      | 11139(39.2)  |
|                    | Older Adult (>60 y)   | 2108(76.2 38.5)          | 657(23.8 31.7)       | 1369(88.7 7.3)        | 175(11.3 7.8)        | 0.56                                       | <0.001   | 3477(80.7 14.4)       | 832(19.3 19.2)       | 4309(15.1)   |
| <b>Afghanistan</b> | <b>Total</b>          | <b>1344(67.8 ..)</b>     | <b>638(32.2 ..)</b>  | <b>9261(89.2 ..)</b>  | <b>1121(10.8 ..)</b> | 8.50                                       | <0.001   | <b>10605(85.8 ..)</b> | <b>1759(14.2 ..)</b> | <b>12364</b> |
|                    | Young Child (<5 y)    | 9(64.3 0.7)              | 5(35.7 0.8)          | 67(56.3 0.7)          | 52(43.7 4.6)         | 10.82                                      | 0.568    | 76(57.1 0.7)          | 57(42.9 3.2)         | 133(1.1)     |
|                    | Child (5-17 y)        | 88(55.7 6.5)             | 70(44.3 11.0)        | 1356(79.3 14.6)       | 354(20.7 31.6)       | 16.43                                      | <0.001   | 1444(77.3 13.6)       | 424(22.7 24.1)       | 1868(15.1)   |
|                    | Young Adult (18-34 y) | 226(65.9 16.8)           | 117(34.1 18.3)       | 5239(93.0 56.6)       | 395(7.0 35.2)        | 3.18                                       | <0.001   | 5465(91.4 51.5)       | 512(8.6 29.1)        | 5977(48.3)   |
|                    | Adult (35-59 y)       | 468(62.0 34.8)           | 287(38.0 45)         | 2139(89.0 23.1)       | 265(11.0 23.6)       | 0.72                                       | <0.001   | 2607(82.5 24.6)       | 552(17.5 31.4)       | 3159(25.5)   |
|                    | Older Adult (>60 y)   | 553(77.7 41.1)           | 159(22.3 24.9)       | 460(89.3 5)           | 55(10.7 4.9)         | 10.39                                      | <0.001   | 1013(82.6 9.6)        | 214(17.4 12.2)       | 1227(9.9)    |
| <b>Cambodia</b>    | <b>Total</b>          | <b>142(70.0 ..)</b>      | <b>61(30.0 ..)</b>   | <b>1861(88.2 ..)</b>  | <b>309(11.8 ..)</b>  | 7.60                                       | <0.001   | <b>2003(86.6 ..)</b>  | <b>309(13.4 ..)</b>  | <b>2312</b>  |
|                    | Young Child (<5 y)    | 2(100 1.4)               | ..                   | 4(66.7 0.2)           | 2(33.3 0.8)          | 12.41                                      | 0.346    | 6(75.0 0.3)           | 2(25.0 0.6)          | 8(0.3)       |
|                    | Child (5-17 y)        | 3(30.0 2.1)              | 7(70.0 11.5)         | 53(69.7 2.8)          | 23(30.3 9.3)         | 14.82                                      | 0.013    | 56(65.1 2.8)          | 30(34.9 9.7)         | 86(3.7)      |
|                    | Young Adult (18-34 y) | 36(70.6 25.4)            | 15(29.4 24.6)        | 551(87.0 29.6)        | 82(13.0 33.1)        | 3.66                                       | 0.001    | 587(85.8 29.3)        | 97(14.2 31.4)        | 684(29.6)    |
|                    | Adult (35-59 y)       | 58(73.4 40.8)            | 21(26.6 34.4)        | 1069(91.3 57.4)       | 102(8.7 41.1)        | 2.05                                       | <0.001   | 1127(90.2 56.3)       | 123(9.8 39.8)        | 1250(54.1)   |
|                    | Older Adult (>60 y)   | 43(70.5 30.3)            | 18(29.5 29.5)        | 184(82.5 9.9)         | 39(17.5 15.7)        | 6.33                                       | 0.038    | 227(79.9 11.3)        | 57(20.1 18.4)        | 284(12.3)    |
| <b>Iraq</b>        | <b>Total</b>          | <b>829(72.4 ..)</b>      | <b>316(27.6 ..)</b>  | <b>2127(90.7 ..)</b>  | <b>219(9.3 ..)</b>   | 13.24                                      | <0.001   | <b>2956(84.7 ..)</b>  | <b>535(15.3 ..)</b>  | <b>3491</b>  |
|                    | Young Child (<5 y)    | 1(33.3 0.1)              | 2(66.7 0.6)          | 12(63.2 0.6)          | 7(36.8 3.2)          | 2.22                                       | 0.329    | 13(59.1 0.4)          | 9(40.9 1.7)          | 22(0.6)      |
|                    | Child (5-17 y)        | 14(50.0 1.7)             | 14(50.0 4.4)         | 122(77.7 5.7)         | 35(22.3 16.0)        | 0.38                                       | 0.002    | 136(73.5 4.6)         | 49(26.5 9.2)         | 185(5.3)     |
|                    | Young Adult (18-34 y) | 43(68.3 5.2)             | 20(31.7 6.3)         | 756(90.6 35.5)        | 78(9.4 35.6)         | 3.32                                       | <0.001   | 799(89.1 27.0)        | 98(10.9 18.3)        | 897(25.7)    |
|                    | Adult (35-59 y)       | 376(74.0 45.4)           | 132(26.0 41.8)       | 1043(92.5 49.0)       | 84(7.5 38.4)         | 2.00                                       | <0.001   | 1419(86.8 48.0)       | 216(13.2 40.4)       | 1635(46.8)   |
|                    | Older Adult (>60 y)   | 395(72.7 47.6)           | 148(27.3 46.8)       | 194(92.8 9.1)         | 15(7.2 6.8)          | 4.34                                       | <0.001   | 589(78.3 19.9)        | 163(21.7 30.5)       | 752(21.5)    |
| <b>Myanmar</b>     | <b>Total</b>          | <b>908(74.5 ..)</b>      | <b>311(25.5 ..)</b>  | <b>3726(92.0 ..)</b>  | <b>322(8.0 ..)</b>   | 3.41                                       | <0.001   | <b>4634(88.0 ..)</b>  | <b>633(12.0 ..)</b>  | <b>5267</b>  |
|                    | Young Child (<5 y)    | 1(50.0 0.1)              | 1(50.0 0.3)          | 2(50.0 0.1)           | 2(50.0 0.6)          | 0.84                                       | 1.000    | 3(50.0 0.1)           | 3(50.0 0.5)          | 6(0.1)       |
|                    | Child (5-17 y)        | 12(41.4 1.3)             | 17(58.6 5.5)         | 93(73.8 2.5)          | 33(26.2 10.2)        | 0.67                                       | 0.001    | 105(67.7 2.3)         | 50(32.3 7.9)         | 155(2.9)     |
|                    | Young Adult (18-34 y) | 111(81.0 12.2)           | 26(19.0 8.4)         | 1249(92.0 33.5)       | 109(8.0 33.9)        | 1.67                                       | <0.001   | 1360(91.0 29.3)       | 135(9 21.3)          | 1495(28.4)   |
|                    | Adult (35-59 y)       | 484(74.0 53.3)           | 170(26.0 54.7)       | 2081(93.4 55.9)       | 147(6.6 45.7)        | 2.11                                       | <0.001   | 2565(89.0 55.4)       | 317(11.0 50.1)       | 2882(54.7)   |
|                    | Older Adult (>60 y)   | 300(75.6 33)             | 97(24.4 31.2)        | 301(90.7 8.1)         | 31(9.3 9.6)          | 1.51                                       | <0.001   | 601(82.4 13)          | 128(17.6 20.2)       | 729(13.8)    |
| <b>Sudan</b>       | <b>Total</b>          | <b>2258(75.1 ..)</b>     | <b>749(24.9 ..)</b>  | <b>1661(82.8 ..)</b>  | <b>344(17.2 ..)</b>  | 0.25                                       | <0.001   | <b>3919(78.2 ..)</b>  | <b>1093(21.8 ..)</b> | <b>5012</b>  |
|                    | Young Child (<5 y)    | 6(50.0 0.3)              | 6(50.0 0.8)          | 14(70.0 0.8)          | 6(30.0 1.7)          | 2.76                                       | 0.258    | 20(62.5 0.5)          | 12(37.5 1.1)         | 32(0.6)      |
|                    | Child (5-17 y)        | 51(60.0 2.3)             | 34(40.0 4.5)         | 124(69.3 7.5)         | 55(30.7 16)          | 5.09                                       | 0.136    | 175(66.3 4.5)         | 89(33.7 8.1)         | 264(5.3)     |
|                    | Young Adult (18-34 y) | 337(71.2 14.9)           | 136(28.8 18.2)       | 578(81.1 34.8)        | 135(18.9 39.2)       | 7.25                                       | <0.001   | 915(77.2 23.3)        | 271(22.8 24.8)       | 1186(23.7)   |
|                    | Adult (35-59 y)       | 1047(75.6 46.4)          | 338(24.4 45.1)       | 715(86.4 43)          | 113(13.6 32.8)       | 8.60                                       | <0.001   | 1762(79.6 45)         | 451(20.4 41.3)       | 2213(44.2)   |
|                    | Older Adult (>60 y)   | 817(77.7 36.2)           | 235(22.3 31.4)       | 230(86.8 13.8)        | 35(13.2 10.2)        | 2.29                                       | 0.001    | 1047(79.5 26.7)       | 270(20.5 24.7)       | 1317(26.3)   |

2 Values are number of participants (row % | column %). Row% relates to sex distribution. Column% relates to age distribution.

3 † Chi Square tests between participants by sex and cause (non-traumatic/ traumatic amputation).

4 y = years

## **Distribution by sex and age of persons presenting with traumatic and non-traumatic amputations**

Table 2 shows that children under 18 attending were represented in low proportions (3 - 5.9%) in all countries except Afghanistan (2001 [16.2%] of 12364). Sudan had the highest proportion of PwA attending in ages over 60 (1317 [26.3%] of 5012).

Most men entering rehabilitation were of working age (18–59 years) ranging from 68.3% (Sudan) to 85.6% (Cambodia) of total males. Among women, the working age group (18–59 years) constituted between 58.7% (Iraq) and 71.4% (Myanmar) of total females.

The proportion of males accessing rehabilitation was higher in all age groups except children under five in Myanmar (3 [50.0%] of 6). Even in older age groups (>60 years) there was a significant male versus female majority (3477 [80.7%] of 4309) across all countries, relating to traumatic and non-traumatic causes. The majority of users with non-traumatic amputation were aged under 60 years, 3373 (61.5%) of 5481 male and 1418 (68.3%) of 2075 female PwA.

## **Distribution of amputation causes by categories and in detail, by country**

Figure 1 illustrates how the registered causes of amputation were categorized. Most amputations were of traumatic origin, 20890 [73.4%] of 28466 (table 3).

Among all men, 18636 (77.3%) of 24117 had traumatic amputations. Among all women, 2254 (52.1%) of 4329 had traumatic amputation.

Sudan had the highest proportion of non-traumatic amputations, 3007 (60.0%) of 5012, outnumbering traumatic amputations across both sexes and had an overall higher female representation of 1093 (21.8%) of 5012 compared to the remaining countries.

Despite the high numbers of conflict-related amputation in the overall cohort, 1885 (43.5%) of 4329 females and 5114 (21.2%) of 24117 males presented with a likely T2D related amputation.

One third (9319 [32.8%] of 28466) of the overall cohort attended with amputation caused by weapon-contamination. RTA constituted 3044 (10.7%) of all amputation causes. Blast injury caused 2319 (8.2%) and gunshot wound (GSW) 1834 (6.4%) of all amputations.

More than half of all men presented with conflict-related traumatic amputations, 12691 (52.7%) of 24117, landmines alone constituted 8571 (35.3%) of all males' amputations.

Within women, traumatic amputations were evenly distributed between conflict and non-conflict related (1110 [25.7%] and 1144 [26.4%] of 4329, respectively). Landmines caused 483 (11.2%), RTA 396 (9.1%) and domestic accidents 369 (8.5%) of all females' amputations. Proportions of men compared to women were significantly higher in most traumatic causes.

This was even more pronounced in conflict-related causes and highest for landmines, 8517 (94.6%) of 9000. In Myanmar, weapon-contamination caused 2200 (41.8%) of 5267 amputations, in Afghanistan 5147 (41.6%) of 12364, in Iraq 714 (20.5%) of 3491, in Sudan 57 (1.1%) of 5012 and in post-conflict Cambodia 1201 (51.9%) of 2312.

Table 3. Distribution of amputation causes by categories and in detail, by country<sup>1</sup>

|                                 |                                      | All countries   |                  |                 | Afghanistan     |                 |                 | Cambodia        |                 |                 |
|---------------------------------|--------------------------------------|-----------------|------------------|-----------------|-----------------|-----------------|-----------------|-----------------|-----------------|-----------------|
|                                 |                                      | Total N         | Male N(R% C%)    | Female N(R% C%) | Total N(C%)     | Male N(R% C%)   | Female N(R% C%) | Total N(C%)     | Male N(R% C%)   | Female N(R% C%) |
| <b>Total</b>                    |                                      | 28446           | 24117(84.8 ..)   | 4329(15.2 ..)   | 12364(..)       | 10605(85.8 ..)  | 1759(14.2 ..)   | 2312(..)        | 2003(86.6 ..)   | 309(13.4 ..)    |
| Non-trauma                      |                                      | 7556            | 5481(72.5 22.7)  | 2075(27.5 47.9) | 1982(16.0)      | 1344(67.8 12.7) | 638(32.2 36.3)  | 203(8.8)        | 142(70.0 7.1)   | 61(30.0 19.7)   |
| Trauma                          |                                      | 20890           | 18636(89.2 77.3) | 2254(10.8 52.1) | 10382(84.0)     | 9261(89.2 87.3) | 1121(10.8 63.7) | 2109(91.2)      | 1861(88.2 92.9) | 248(11.8 80.3)  |
| <b>Causes by Sub-Categories</b> |                                      |                 |                  |                 |                 |                 |                 |                 |                 |                 |
| Non-trauma NCD/T2D              |                                      | 6999            | 5114(73.1 21.2)  | 1885(26.9 43.5) | 1750(14.2)      | 1190(68.0 11.2) | 560(32.0 31.8)  | 192(8.3)        | 134(69.8 6.7)   | 58(30.2 18.8)   |
| Non-trauma Other                |                                      | 557             | 367(65.9 1.5)    | 190(34.1 4.4)   | 232(1.9)        | 154(66.4 1.5)   | 78(33.6 4.4)    | 11(0.5)         | 8(72.7 0.4)     | 3(27.3 1)       |
| Trauma                          | Trauma Non-conflict Non-accident     | 1164            | 930(79.9 3.9)    | 234(20.1 5.4)   | 332(2.7)        | 255(76.8 2.4)   | 77(23.2 4.4)    | 320(13.8)       | 275(85.9 13.7)  | 45(14.1 14.6)   |
|                                 | Trauma Non-conflict Accident         | 5925            | 5015(84.6 20.8)  | 910(15.4 21)    | 2245(18.2)      | 1872(83.4 17.7) | 373(16.6 21.2)  | 501(21.7)       | 423(84.4 21.1)  | 78(15.6 25.2)   |
|                                 | Trauma Conflict Weapon               | 4482            | 3872(86.4 16.1)  | 610(13.6 14.1)  | 2658(21.5)      | 2261(85.1 21.3) | 397(14.9 22.6)  | 87(3.8)         | 62(71.3 3.1)    | 25(28.7 8.1)    |
|                                 | Trauma Conflict Weapon contamination | 9319            | 8819(94.6 36.6)  | 500(5.4 11.6)   | 5147(41.6)      | 4873(94.7 46.0) | 274(5.3 15.6)   | 1201(51.9)      | 1101(91.7 55)   | 100(8.3 32.4)   |
| <b>Causes in Detail</b>         |                                      |                 |                  |                 |                 |                 |                 |                 |                 |                 |
| Non-trauma                      | Infectious                           | 3661            | 2618(71.5 10.9)  | 1043(28.5 24.1) | 1205(9.7)       | 821(68.1 7.7)   | 384(31.9 21.8)  | 161(7)          | 117(72.7 5.8)   | 44(27.3 14.2)   |
|                                 | Metabolic                            | 148             | 115(77.7 0.5)    | 33(22.3 0.8)    | 137(1.1)        | 110(80.3 1.0)   | 27(19.7 1.5)    | ..              | ..              | ..              |
|                                 | Vascular                             | 3190            | 2381(74.6 9.9)   | 809(25.4 18.7)  | 408(3.3)        | 259(63.5 2.4)   | 149(36.5 8.5)   | 31(1.3)         | 17(54.8 0.8)    | 14(45.2 4.5)    |
|                                 | Cancerous                            | 511             | 344(67.3 1.4)    | 167(32.7 3.9)   | 204(1.6)        | 144(70.6 1.4)   | 60(29.4 3.4)    | 1(0.0)          | 1(100 0)        | ..              |
|                                 | Other – Non-Trauma                   | 46              | 23(50.0 0.1)     | 23(50.0 0.5)    | 28(0.2)         | 10(35.7 0.1)    | 18(64.3 1)      | 10(0.4)         | 7(70.0 0.3)     | 3(30.0 1.0)     |
| Trauma                          | Animal bite                          | 203             | 156(76.8 0.6)    | 47(23.2 1.1)    | 15(0.1)         | 14(93.3 0.1)    | 1(6.7 0.1)      | 16(0.7)         | 11(68.8 0.5)    | 5(31.3 1.6)     |
|                                 | Crime                                | 5               | 5(100 0)         | ..              | 3(0)            | 3(100 0)        | ..              | ..              | ..              | ..              |
|                                 | Frost bite                           | 48              | 46(95.8 0.2)     | 2(4.2 0)        | 37(0.3)         | 35(94.6 0.3)    | 2(5.4 0.1)      | ..              | ..              | ..              |
|                                 | Other – Trauma                       | 908             | 723(79.6 3.0)    | 185(20.4 4.3)   | 277(2.2)        | 203(73.3 1.9)   | 74(26.7 4.2)    | 304(13.1)       | 264(86.8 13.2)  | 40(13.2 12.9)   |
|                                 | Domestic accident                    | 1388            | 1019(73.4 4.2)   | 369(26.6 8.5)   | 825(6.7)        | 557(67.5 5.3)   | 268(32.5 15.2)  | 52(2.2)         | 45(86.5 2.2)    | 7(13.5 2.3)     |
|                                 | Occupational accident                | 1191            | 1096(92.0 4.5)   | 95(8.0 2.2)     | 379(3.1)        | 363(95.8 3.4)   | 16(4.2 0.9)     | 93(4)           | 79(84.9 3.9)    | 14(15.1 4.5)    |
|                                 | Railway accident                     | 227             | 183(80.6 0.8)    | 44(19.4 1.0)    | 10(0.1)         | 9(90.0 0.1)     | 1(10.0 0.1)     | 3(0.1)          | 2(66.7 0.1)     | 1(33.3 0.3)     |
|                                 | RTA                                  | 3044            | 2648(87.0 11.0)  | 396(13.0 9.1)   | 1024(8.3)       | 936(91.4 8.8)   | 88(8.6 5.0)     | 349(15.1)       | 294(84.2 14.7)  | 55(15.8 17.8)   |
|                                 | Sport accident                       | 75              | 69(92.0 0.3)     | 6(8.0 0.1)      | 7(0.1)          | 7(100 0.1)      | ..              | 4(0.2)          | 3(75.0 0.1)     | 1(25.0 0.3)     |
|                                 | Blast injury                         | 2319            | 1980(85.4 8.2)   | 339(14.6 7.8)   | 1383(11.2)      | 1131(81.8 10.7) | 252(18.2 14.3)  | 15(0.6)         | 11(73.3 0.5)    | 4(26.7 1.3)     |
|                                 | GSW                                  | 1834            | 1628(88.8 6.8)   | 206(11.2 4.8)   | 1157(9.4)       | 1037(89.6 9.8)  | 120(10.4 6.8)   | 28(1.2)         | 23(82.1 1.1)    | 5(17.9 1.6)     |
|                                 | Other – Conflict                     | 273             | 218(79.9 0.9)    | 55(20.1 1.3)    | 88(0.7)         | 68(77.3 0.6)    | 20(22.7 1.1)    | 25(1.1)         | 12(48.0 0.6)    | 13(52.0 4.2)    |
|                                 | No data*                             | 56              | 46(82.1 0.2)     | 10(17.9 0.2)    | 30(0.2)         | 25(83.3 0.2)    | 5(16.7 0.3)     | 19(0.8)         | 16(84.2 0.8)    | 3(15.8 1.0)     |
|                                 | Cluster Munitions                    | 71              | 69(97.2 0.3)     | 2(2.8 0)        | 38(0.3)         | 37(97.4 0.3)    | 1(2.6 0.1)      | 11(0.5)         | 11(100 0.5)     | ..              |
|                                 | ERW                                  | 248             | 233(94.0 1.0)    | 15(6.0 0.3)     | 208(1.7)        | 197(94.7 1.9)   | 11(5.3 0.6)     | 1(0)            | 1(100 0)        | ..              |
| Landmines                       | 9000                                 | 8517(94.6 35.3) | 483(5.4 11.2)    | 4901(39.6)      | 4639(94.7 43.7) | 262(5.3 14.9)   | 1189(51.4)      | 1089(91.6 54.4) | 100(8.4 32.4)   |                 |

<sup>1</sup>the reader is directed to fig. 1 when interpreting this table

|                                 |                                      | Iraq           |                |                 | Myanmar         |                 |                 | Sudan        |                 |                 |
|---------------------------------|--------------------------------------|----------------|----------------|-----------------|-----------------|-----------------|-----------------|--------------|-----------------|-----------------|
|                                 |                                      | Total N(C%)    | Male N(R% C%)  | Female N(R% C%) | Total N(C%)     | Male N(R% C%)   | Female N(R% C%) | Total N(C%)  | Male N(R% C%)   | Female N(R% C%) |
| <b>Total</b>                    |                                      | 3491(..)       | 2956(84.7 ..)  | 535(15.3 ..)    | 5267(..)        | 4634(88.0 ..)   | 633(12.0 ..)    | 5012(..)     | 3919(78.2 ..)   | 1093(21.8 ..)   |
|                                 | Non-trauma                           | 1145(32.8)     | 829(72.4 28)   | 316(27.6 59.1)  | 1219(23.1)      | 908(74.5 19.6)  | 311(25.5 49.1)  | 3007(60.0)   | 2258(75.1 57.6) | 749(24.9 68.5)  |
|                                 | Trauma                               | 2346(67.2)     | 2127(90.7 72)  | 219(9.3 40.9)   | 4048(76.9)      | 3726(92.0 80.4) | 322(8.0 50.9)   | 2005(40.0)   | 1661(82.8 42.4) | 344(17.2 31.5)  |
| <b>Causes by Sub-Categories</b> |                                      |                |                |                 |                 |                 |                 |              |                 |                 |
|                                 | Non-trauma NCD/T2D                   | 1084(31.1)     | 790(72.9 26.7) | 294(27.1 55.0)  | 1138(21.6)      | 846(74.3 18.3)  | 292(25.7 46.1)  | 2835(56.6)   | 2154(76.0 55.0) | 681(24.0 62.3)  |
|                                 | Non-trauma Other                     | 61(1.7)        | 39(63.9 1.3)   | 22(36.1 4.1)    | 81(1.5)         | 62(76.5 1.3)    | 19(23.5 3)      | 172(3.4)     | 104(60.5 2.7)   | 68(39.5 6.2)    |
| Trauma                          | Trauma Non-conflict Non-accident     | 32(0.9)        | 29(90.6 1)     | 3(9.4 0.6)      | 76(1.4)         | 60(78.9 1.3)    | 16(21.1 2.5)    | 404(8.1)     | 311(77.0 7.9)   | 93(23.0 8.5)    |
|                                 | Trauma Non-conflict Accident         | 525(15)        | 446(85 15.1)   | 79(15 14.8)     | 1689(32.1)      | 1469(87.0 31.7) | 220(13.0 34.8)  | 965(19.3)    | 805(83.4 20.5)  | 160(16.6 14.6)  |
|                                 | Trauma Conflict Weapon               | 1075(30.8)     | 978(91 33.1)   | 97(9.0 18.1)    | 83(1.6)         | 77(92.8 1.7)    | 6(7.2 0.9)      | 579(11.6)    | 494(85.3 12.6)  | 85(14.7 7.8)    |
|                                 | Trauma Conflict Weapon contamination | 714(20.5)      | 674(94.4 22.8) | 40(5.6 7.5)     | 2200(41.8)      | 2120(96.4 45.7) | 80(3.6 12.6)    | 57(1.1)      | 51(89.5 1.3)    | 6(10.5 0.5)     |
| <b>Causes in Detail</b>         |                                      |                |                |                 |                 |                 |                 |              |                 |                 |
| Non-trauma                      | Infectious                           | 367(10.5)      | 260(70.8 8.8)  | 107(29.2 20.0)  | 542(10.3)       | 387(71.4 8.4)   | 155(28.6 24.5)  | 1386(27.7)   | 1033(74.5 26.4) | 353(25.5 32.3)  |
|                                 | Metabolic                            | ..             | ..             | ..              | 11(0.2)         | 5(45.5 0.1)     | 6(54.5 0.9)     | ..           | ..              | ..              |
|                                 | Vascular                             | 717(20.5)      | 530(73.9 17.9) | 187(26.1 35.0)  | 585(11.1)       | 454(77.6 9.8)   | 131(22.4 20.7)  | 1449(28.9)   | 1121(77.4 28.6) | 328(22.6 30)    |
|                                 | Cancerous                            | 60(1.7)        | 38(63.3 1.3)   | 22(36.7 4.1)    | 74(1.4)         | 57(77.0 1.2)    | 17(23.0 2.7)    | 172(3.4)     | 104(60.5 2.7)   | 68(39.5 6.2)    |
|                                 | Other – Non-Trauma                   | 1(0)           | 1(100 0)       | ..              | 7(0.1)          | 5(71.4 0.1)     | 2(28.6 0.3)     | ..           | ..              | ..              |
| Trauma                          | Infectious                           | 4(0.1)         | 3(75 0.1)      | 1(25.0 0.2)     | 20(0.4)         | 13(65.0 0.3)    | 7(35.0 1.1)     | 148(3.0)     | 115(77.7 2.9)   | 33(22.3 3.0)    |
|                                 | Crime                                | 2(0.1)         | 2(100 0.1)     | ..              | ..              | ..              | ..              | ..           | ..              | ..              |
|                                 | Frost bite                           | 6(0.2)         | 6(100 0.2)     | ..              | 3(0.1)          | 3(100 0.1)      | ..              | 2(0)         | 2(100 0.1)      | ..              |
|                                 | Other – Trauma                       | 20(0.6)        | 18(90.0 0.6)   | 2(10.0 0.4)     | 53(1)           | 44(83.0 0.9)    | 9(17.0 1.4)     | 254(5.1)     | 194(76.4 5)     | 60(23.6 5.5)    |
|                                 | Domestic accident                    | 83(2.4)        | 66(79.5 2.2)   | 17(20.5 3.2)    | 297(5.6)        | 259(87.2 5.6)   | 38(12.8 6)      | 131(2.6)     | 92(70.2 2.3)    | 39(29.8 3.6)    |
|                                 | Occupational accident                | 102(2.9)       | 95(93.1 3.2)   | 7(6.9 1.3)      | 553(10.5)       | 499(90.2 10.8)  | 54(9.8 8.5)     | 63(1.3)      | 60(95.2 1.5)    | 3(4.8 0.3)      |
|                                 | Railway accident                     | 8(0.2)         | 6(75 0.2)      | 2(25.0 0.4)     | 164(3.1)        | 129(78.7 2.8)   | 35(21.3 5.5)    | 42(0.8)      | 37(88.1 0.9)    | 5(11.9 0.5)     |
|                                 | RTA                                  | 325(9.3)       | 272(83.7 9.2)  | 53(16.3 9.9)    | 637(12.1)       | 546(85.7 11.8)  | 91(14.3 14.4)   | 709(14.1)    | 600(84.6 15.3)  | 109(15.4 10)    |
|                                 | Sport accident                       | 7(0.2)         | 7(100 0.2)     | ..              | 38(0.7)         | 36(94.7 0.8)    | 2(5.3 0.3)      | 19(0.4)      | 16(84.2 0.4)    | 3(15.8 0.3)     |
|                                 | Blast injury                         | 844(24.2)      | 770(91.2 26)   | 74(8.8 13.8)    | 17(0.3)         | 15(88.2 0.3)    | 2(11.8 0.3)     | 60(1.2)      | 53(88.3 1.4)    | 7(11.7 0.6)     |
|                                 | GSW                                  | 144(4.1)       | 130(90.3 4.4)  | 14(9.7 2.6)     | 60(1.1)         | 56(93.3 1.2)    | 4(6.7 0.6)      | 445(8.9)     | 382(85.8 9.7)   | 63(14.2 5.8)    |
|                                 | Other – Conflict                     | 85(2.4)        | 76(89.4 2.6)   | 9(10.6 1.7)     | 4(0.1)          | 4(100 0.1)      | ..              | 71(1.4)      | 58(81.7 1.5)    | 13(18.3 1.2)    |
|                                 | No data*                             | 2(0.1)         | 2(100 0.1)     | ..              | 2(0)            | 2(100 0)        | ..              | 3(0.1)       | 1(33.3 0)       | 2(66.7 0.2)     |
|                                 | Cluster Munitions                    | 2(0.1)         | 2(100 0.1)     | ..              | 6(0.1)          | 6(100 0.1)      | ..              | 14(0.3)      | 13(92.9 0.3)    | 1(7.1 0.1)      |
|                                 | ERW                                  | 38(1.1)        | 34(89.5 1.2)   | 4(10.5 0.7)     | 1(0)            | 1(100 0)        | ..              | ..           | ..              | ..              |
| Landmine                        | 674(19.3)                            | 638(94.7 21.6) | 36(5.3 6.7)    | 2193(41.6)      | 2113(96.4 45.6) | 80(3.6 12.6)    | 43(0.9)         | 38(88.4 1.0) | 5(11.6 0.5)     |                 |

Categories of amputation causes as illustrated in figure 1 and detailed causes in totals, by sex and by country. Values are number of participants (row % | column%). Row% relates to sex distribution. Column% relates to amputation cause distribution. RTA = road traffic accident; GSW = Gunshot wound; ERW = explosive remnants of war; no data = missing variable (mandatory entry in database) due to software error in the category ‘Trauma Conflict Weapon’.

1 **Table 4. Amputation characteristics - combinations and levels of amputation**

| Combinations of amputation(s)                  | All Amputations    |                         |                        | Non-Traumatic Amputations |                        |                        | Traumatic Amputations |                         |                        |
|------------------------------------------------|--------------------|-------------------------|------------------------|---------------------------|------------------------|------------------------|-----------------------|-------------------------|------------------------|
|                                                | Total PwA (C%)     | Male N (R% C%)          | Female N (R% C%)       | Total (C%)                | Male N(R% C%)          | Female N(R% C%)        | Total (C%)            | Male N(R% C%)           | Female N(R% C%)        |
| <b>Total participants</b>                      | <b>28446</b>       | <b>24117 (84.8 ..)</b>  | <b>4329 (15.2 ..)</b>  | <b>7556(0)</b>            | <b>5481(72.5 0)</b>    | <b>2075(27.5 0)</b>    | <b>20890(0)</b>       | <b>18636(89.2 0)</b>    | <b>2254(10.8 0)</b>    |
| Persons with single LEA                        | 22693 (79.8)       | 19152 (84.4 79.4)       | 3541 (15.6 81.8)       | 7049(93.3)                | 5122(72.7 93.5)        | 1927(27.3 92.9)        | 15644(74.9)           | 14030(89.7 75.3)        | 1614(10.3 71.6)        |
| Persons with single UEA                        | 3402 (12.0)        | 2951 (86.7 12.2)        | 451 (13.3 10.4)        | 177(2.3)                  | 110(62.1 2.0)          | 67(37.9 3.2)           | 3225(15.4)            | 2841(88.1 15.2)         | 384(11.9 17.0)         |
| Persons with double LEA                        | 1868 (6.6)         | 1575 (84.3 6.5)         | 293 (15.7 6.8)         | 302(4.0)                  | 225(74.5 4.1)          | 77(25.5 3.7)           | 1566(7.5)             | 1350(86.2 7.2)          | 216(13.8 9.6)          |
| Persons with double UEA                        | 157 (0.6)          | 149 (94.9 0.6)          | 8 (5.1 0.2)            | 6(0.1)                    | 6(100 0.1)             | ..                     | 151(0.7)              | 143(94.7 0.8)           | 8(5.3 0.4)             |
| Persons with single LEA + single UEA           | 195 (0.7)          | 177 (90.8 0.7)          | 18 (9.2 0.4)           | 15(0.2)                   | 13(86.7 0.2)           | 2(13.3 0.1)            | 180(0.9)              | 164(91.1 0.9)           | 16(8.9 0.7)            |
| Persons with double LEA + single UEA           | 92 (0.3)           | 80 (87.0 0.3)           | 12 (13.0 0.3)          | 3(0)                      | 3(100 0.1)             | ..                     | 89(0.4)               | 77(86.5 0.4)            | 12(13.5 0.5)           |
| Persons with single LEA + double UEA           | 24 (0.1)           | 22 (91.7 0.1)           | 2 (8.3 0)              | 2(0)                      | 1(50 0)                | 1(50 0)                | 22(0.1)               | 21(95.5 0.1)            | 1(4.5 0)               |
| Persons with double LEA + double UEA           | 15 (0.1)           | 11 (73.3 0)             | 4 (26.7 0.1)           | 2(0)                      | 1(50 0)                | 1(50 0)                | 13(0.1)               | 10(76.9 0.1)            | 3(23.1 0.1)            |
| Levels of amputation(s)                        | Total Amp (C%)     | Amp in male PwA         | Amp in female PwA      | Total Amp                 | Amp in male PwA        | Amp in female PwA      | Total Amp             | Amp in male PwA         | Amp in female PwA      |
| <b>Total amputations</b>                       | <b>30943</b>       | <b>26255 (84.8 ..)</b>  | <b>4688 (15.2 ..)</b>  | <b>7835</b>               | <b>5694 (72.7 0)</b>   | <b>2141 (27.3 0)</b>   | <b>21795</b>          | <b>19384 (88.9 0)</b>   | <b>2411 (11.1 0)</b>   |
| <b>Total LEA</b>                               | <b>26862(86.8)</b> | <b>22683(84.4 86.4)</b> | <b>4179(15.6 89.1)</b> | <b>7680(98.0)</b>         | <b>5594(72.8 98.2)</b> | <b>2086(27.2 97.4)</b> | <b>19182(88.0)</b>    | <b>17089(89.1 88.2)</b> | <b>2093(10.9 86.8)</b> |
| Partial foot amputation                        | 1866(6.0)          | 1374(73.6 5.2)          | 492(26.4 10.5)         | 333(4.3)                  | 241(72.4 4.2)          | 92(27.6 4.3)           | 1533(7.0)             | 1133(73.9 5.8)          | 400(26.1 16.6)         |
| Ankle disarticulation                          | 432(1.4)           | 349(80.8 1.3)           | 83(19.2 1.8)           | 117(1.5)                  | 79(67.5 1.4)           | 38(32.5 1.8)           | 315(1.4)              | 270(85.7 1.4)           | 45(14.3 1.9)           |
| Transtibial amputation                         | 15399(49.8)        | 13017(84.5 49.6)        | 2382(15.5 50.8)        | 5008(63.9)                | 3665(73.2 64.4)        | 1343(26.8 62.7)        | 10391(47.7)           | 9352(90.0 48.2)         | 1039(10.0 43.1)        |
| Knee disarticulation/ Transcondylar amputation | 887(2.9)           | 759(85.6 2.9)           | 128(14.4 2.7)          | 164(2.1)                  | 128(78 2.2)            | 36(22 1.7)             | 723(3.3)              | 631(87.3 3.3)           | 92(12.7 3.8)           |
| Transfemoral amputation                        | 8080(26.1)         | 7019(86.9 26.7)         | 1061(13.1 22.6)        | 1983(25.3)                | 1430(72.1 25.1)        | 553(27.9 25.8)         | 6097(28)              | 5589(91.7 28.8)         | 508(8.3 21.1)          |
| Hip disarticulation/ Hemipelvectomy            | 198(0.6)           | 165(83.3 0.6)           | 33(16.7 0.7)           | 75(1.0)                   | 51(68 0.9)             | 24(32 1.1)             | 123(0.6)              | 114(92.7 0.6)           | 9(7.3 0.4)             |
| <b>Total UEA</b>                               | <b>4081(13.2)</b>  | <b>3572(87.5 13.6)</b>  | <b>509(12.5 10.9)</b>  | <b>155(2.0)</b>           | <b>100(64.5 1.8)</b>   | <b>55(35.5 2.6)</b>    | <b>2613(12.0)</b>     | <b>2295(87.8 11.8)</b>  | <b>318(12.2 13.2)</b>  |
| Partial hand amputation                        | 322(1.0)           | 258(80.1 1.0)           | 64(19.9 1.4)           | 21(0.3)                   | 12(57.1 0.2)           | 9(42.9 0.4)            | 124(0.6)              | 94(75.8 0.5)            | 30(24.2 1.2)           |
| Wrist disarticulation                          | 436(1.4)           | 393(90.1 1.5)           | 43(9.9 0.9)            | 11(0.1)                   | 8(72.7 0.1)            | 3(27.3 0.1)            | 417(1.9)              | 378(90.6 2.0)           | 39(9.4 1.6)            |
| Transradial amputation                         | 1973(6.4)          | 1762(89.3 6.7)          | 211(10.7 4.5)          | 37(0.5)                   | 23(62.2 0.4)           | 14(37.8 0.7)           | 820(3.8)              | 731(89.1 3.8)           | 89(10.9 3.7)           |
| Elbow disarticulation                          | 151(0.5)           | 131(86.8 0.5)           | 20(13.2 0.4)           | 9(0.1)                    | 6(66.7 0.1)            | 3(33.3 0.1)            | 139(0.6)              | 123(88.5 0.6)           | 16(11.5 0.7)           |
| Transhumeral amputation                        | 1078(3.5)          | 927(86 3.5)             | 151(14.0 3.2)          | 66(0.8)                   | 42(63.6 0.7)           | 24(36.4 1.1)           | 1004(4.6)             | 877(87.4 4.5)           | 127(12.6 5.3)          |
| Shoulder disarticulation                       | 121(0.4)           | 101(83.5 0.4)           | 20(16.5 0.4)           | 11(0.1)                   | 9(81.8 0.2)            | 2(18.2 0.1)            | 109(0.5)              | 92(84.4 0.5)            | 17(15.6 0.7)           |

2 Values are number of participants and number of amputations, respectively (row % | column %). Row% relates to sex distribution. Column% relates to amputation  
3 characteristic distribution. LEA = lower extremity amputation; UEA = upper extremity amputation

### 1 **Amputation characteristics - combinations and levels of amputation**

2 Table 4 illustrates amputation characteristics by combinations and levels. Multiple  
3 amputations were present in 2014 (8.4%) of 24117 men and 337 (7.8%) of 4329 women.  
4 Double LEA was the most common combination occurring in 1575 (6.5%) men and 293  
5 (6.8%) women and more likely in persons with traumatic amputations (1566 [7.5%] of  
6 20890) compared to those with non-traumatic amputations (302 [4.0%] of 7556).  
7 In total, 30943 amputations were registered, of which 15399 (49.8%) were transtibial. Of all  
8 non-traumatic amputations, 7680 (98.0% of 7835) were LEA, the majority transtibial (5008  
9 [63.9%]), whereas 2613 (12.0% of 19182) of all traumatic amputations occurred in the upper  
10 extremity.

### 11 **Living environment**

12 Most PwA reportedly came from rural environment (17202 [60.5%] of 28446; 1996 [7%]  
13 unspecified). There was a significantly higher proportion of women (1742 [18.8%] of 9248) in  
14 the urban compared to the rural population, (2308 [13.4%] of 17202;  $p < 0.01$ ).  
15  
16  
17

## 18 **DISCUSSION**

---

19 Traumatic amputation at young adult age has devastating effects on a person's private and  
20 professional perspectives. A worrying finding in this study was the delay between  
21 amputation and beginning rehabilitation, particularly for those with traumatic amputation.  
22 Ideally, prosthetic fitting happens right after wound-healing. Any delay will increase  
23 functional limitations and the potential of complications.<sup>40</sup> Consequently, duration, costs  
24 and complexity of rehabilitation will rise, including prosthetic adjustments. In cases of  
25 irreversible limitations PwA may no longer qualify for fitting.<sup>6</sup> The studied countries are  
26 marked either by protracted crisis with recurring flares of acute fighting or post-conflict with  
27 weak economy and fragile health systems.<sup>31</sup> These factors result in high numbers of PwA,  
28 who face access difficulties to rehabilitation aggravated by compromised infrastructure and  
29 security, lack of means or awareness, and critical scarcity or overload of existing  
30 rehabilitation workforce and services.<sup>4,41,42</sup>

31 The later age observed for non-traumatic amputation is not surprising, but the average age  
32 of 48.2 years is very low compared to studies in HIC reporting ages of over 65.<sup>1,43</sup>  
33 Amputations at young age as a complication of underlying health conditions such as T2D  
34 reflect the many health system challenges in the studied countries.<sup>44</sup> Although this group  
35 attends rehabilitation significantly faster than the traumatic group, the delay is still  
36 considerable and potentially harmful in view of the risks associated with immobility in poorly  
37 managed T2D. The difference in delay between the traumatic and non-traumatic cohorts  
38 may be explained by the widespread lack of essential healthcare services during past conflict  
39 (e.g. Cambodia).<sup>45</sup> This may have led to high mortality rates in persons with conditions like  
40 T2D. PwA of traumatic origin may have survived long enough to eventually attend  
41 rehabilitation, after years of unavailability or inaccessibility of services, a possible  
42 explanation for the considerable backlog of persons with traumatic amputations. A steadfast  
43 interpretation of detailed delays is impossible owing to the extremely complex conflict

1  
2  
3  
4  
5  
6  
7  
8  
9  
10  
11  
12  
13  
14  
15  
16  
17  
18  
19  
20  
21  
22  
23  
24  
25  
26  
27  
28  
29  
30  
31  
32  
33  
34  
35  
36  
37  
38  
39  
40  
41  
42  
43  
44  
45  
46  
47  
48  
49  
50  
51  
52  
53  
54  
55  
56  
57  
58  
59  
60

1 history and uncertain service provision in the studied contexts including displaced  
2 populations, persons of a specific ethnicity or with a political or military past unable to cross  
3 certain combat zones. What we know for sure is that an amputation at working age and  
4 delayed prosthetic fitting and rehabilitation – not counting the unknown numbers of non-  
5 attendees – feed into the vicious cycle of disability and poverty, increasing the difficulties  
6 PwA face when it comes to reintegrating into society in these contexts.<sup>42,46</sup>

7 The proportions of non-traumatic and traumatic amputations are reversed compared to  
8 non-conflict countries and disclose the human cost of protracted crises.<sup>43,47</sup> Explosive  
9 devices as amputation cause lead to complex injuries.<sup>4,23</sup> Patient outcomes depend on the  
10 availability and capacity of specialised emergency and surgical care if the effects of  
11 polytraumas are handled optimally. Subject to the extent of injury and the firearm used,  
12 amputations from GSW may also be an indicator of delayed trauma- and general poor  
13 health-care. In remote areas injured people may reach medical assistance only at a stage  
14 when the affected limb can no longer be saved. Furthermore, amputation being less time-  
15 consuming and risky than limb salvage may be indicated to assist higher numbers of  
16 people.<sup>48,49</sup> A person with traumatic amputation needs to cope with the sudden loss when  
17 adapting to a life with permanent disability. Rehabilitation outcomes depend on the  
18 complexity of polytraumas. The psychological consequences and post-traumatic  
19 repercussion are considerable after traumatic amputation and require specialised  
20 multidisciplinary care.<sup>23,46,50</sup>

21 The studied countries rank among the most mine-contaminated contexts worldwide.<sup>51</sup>  
22 Survivors with amputations from weapon-contamination symbolise the long-term  
23 consequences of conflict, which may last for decades and continue producing injuries and  
24 disability long after the end of active fighting. Cambodia's almost 30 years of conflict, for  
25 instance, ended in 1998. Between 2009 and 2018 more than half of all new registrations  
26 attending rehabilitation were male PwA caused by landmines exemplifying the sustained  
27 destructive potential of conflict on a society.

28 Many PRCs operate independently of other health structures and without medical personnel  
29 to confirm T2D diagnosis. Therefore, the numbers of amputation due to T2D may be  
30 underestimated, a conclusion also reported in amputation incidence studies.<sup>1</sup> Metabolic and  
31 vascular causes as noted by rehabilitation personnel without diagnostic tools and  
32 competencies were most probably linked to T2D, vascular complication of T2D or another  
33 vascular NCD.<sup>37</sup> Likewise, most infections causing non-traumatic amputations were assumed  
34 to result from undiagnosed or undocumented T2D with infected ulcer and gangrene.<sup>26,36</sup>  
35 Common etiologies of diabetes foot ulcer include neuropathic (approximately 55%), arterial  
36 (10%) and neuroischemic causes (approximately 35%).<sup>38</sup> PwA due to T2D in fragile settings  
37 are a highly vulnerable group. The amputation will be the consequence of a progressing  
38 chronic illness, which might be diagnosed only at the time of complication and which the  
39 person will have to cope with on top of the limb loss. If diagnosed, the person's  
40 understanding of their health status and its implications for lifestyle changes will be crucial.  
41 The risk of complications is considerable as the 39–68% five years mortality rate of diabetic  
42 foot shows.<sup>52</sup> In conflict countries, the comprehensive care required for conditions like T2D  
43 is challenged by lack of availability, affordability and access to inter-professional services for  
44 diagnosis and long-term management. It is also compromised by the environment as living in

1  
2  
3 1 displacement and depending on aid do not facilitate the necessary lifestyle adaptations, such  
4 2 as diet and exercise. Deprioritisation of NCD-care in crisis settings in order to address  
5 3 immediate trauma and prevent epidemics puts T2D patients at higher risk of neglect.<sup>26</sup>  
6 4 Regaining functionality through active rehabilitation may be more demanding compared to  
7 5 someone with traumatic amputation due to age and general health differences between  
8 6 both populations. The fitting process will be more complicated due to the remaining limb's  
9 7 shape and consistency. Complex chronic conditions require a kind of rehabilitation that PRCs  
10 8 in conflict zones may not be organized for.

11 9 The lack of T2D diagnostic data highlights the PRCs' unpreparedness for such scenarios,  
12 10 which will require changes of procedures, staffing ratio, occupancy rates and equipment and  
13 11 enhanced workforce skills regarding NCD/T2D management, diagnostics and data  
14 12 collections. International actors specialising in health and rehabilitation services and  
15 13 governments need to join forces and prioritise rehabilitation towards achieving sustainable  
16 14 development goal 3 which aims to "ensure healthy lives and promote well-being for all at all  
17 15 ages".<sup>53</sup> Improved NCD management on primary healthcare level is the first step.<sup>54</sup> Equally  
18 16 important will be adaptations of referral systems, interprofessional collaborations across the  
19 17 continuum of care and investments in systematic promotion of physical activity and  
20 18 preventive measures for persons at risk. To implement these recommendations, the health  
21 19 and rehabilitation expertise of international actors should get systematically informed by the  
22 20 contextualised know-how and commitment of local stakeholders including governmental  
23 21 and non-governmental institutions, health professionals and patients.

24 22 The peak of amputation among young adult males and the significant majority of male PwA  
25 23 may be explained by ongoing conflict in most contexts. There is consensus in the literature  
26 24 that worldwide more males than females undergo amputation, but the distribution differs  
27 25 according to age and cause.<sup>1,55,56</sup> Especially during active age and regardless of conflict, rates  
28 26 are higher in men due to work- or leisure-related accidents.<sup>47,57</sup> Despite a similar T2D  
29 27 prevalence among sexes, T2D-related amputation rates are higher among men due to higher  
30 28 prevalence of smoking, peripheral vascular disease, neuropathy and diabetic foot  
31 29 ulceration.<sup>1</sup> For certain groups a gender dimension may influence access to rehabilitation.  
32 30 Higher female than male proportions are reported for older persons with traumatic  
33 31 amputations which are unlikely due to combat or occupational risk.<sup>56,57</sup> This is in contrast to  
34 32 the significant male majority in our study population. Also, our findings revealed that in  
35 33 urban environments, and in contrast to men, female PwA attending rehabilitation constitute  
36 34 a significantly larger proportion than in rural environments. Access barriers to services for  
37 35 women from more remote rural areas may exist such as challenging infrastructure, poverty,  
38 36 insecurity, and cultural factors and warrant further investigation.<sup>58</sup>

39 37 The main limitation of this study is that data is derived from ICRC PRCs only and therefore  
40 38 not representative of population. However, in absence of amputation incidence data this  
41 39 first multi-country analysis offers a unique insight into the population of rehabilitation users  
42 40 with amputations in fragile contexts including (ex-)combatants and civilians of all ages with  
43 41 amputations of all origins. As the data does not represent prevalence, but attendance to  
44 42 rehabilitation, it is difficult to estimate how many PwA do not receive services. Where  
45 43 existing, data was compared to published prevalence studies from similar contexts. The  
46 44 dearth of quality publications in such contexts underlines the mismatch between existing  
47 45 research and where the burden of disease is.<sup>24</sup>



1  
2  
3 1  
4 2 In conclusion, this study highlights the persisting burden of amputation in conflict contexts  
5 3 and the consequences of broken health systems and a fragmented continuum of care. Young  
6 4 age and long delays to rehabilitation reveal the hardship in which PwAs live in such settings.  
7 5 The figures of landmine-caused amputations disclose the cruel long-term dimension of  
8 6 conflict.

9 7 Rehabilitation services are seriously under-resourced as revealed in a recent publication on  
10 8 global estimates of rehabilitation needs.<sup>59</sup> Our data have been collected in highly challenging  
11 9 and diverse settings where even basic healthcare is compromised. Providing rehabilitation  
12 10 and collecting data in these underserved, volatile contexts is exceptionally complex.<sup>28</sup> The  
13 11 few PRCs in conflict settings cater for amputations of various causes and PwA of different  
14 12 age, sex, other trauma and co-morbidities including psychological after-effects and future  
15 13 prospects of life with amputation. This requires tailored approaches matched with outcome  
16 14 and impact measurements. Managing these highly diverse processes is the responsibility of a  
17 15 multidisciplinary rehabilitation team including peer-support by other PwA – an enormous  
18 16 challenge in settings with so many needs and so little resources.

19 17 Preventive measures on all levels of healthcare are essential to reduce the number of T2D-  
20 18 caused amputations. Rather than solely managing amputations as the last consequence,  
21 19 rehabilitation professionals should get increasingly involved in provision of comprehensive  
22 20 care.

23 21 We call out to rehabilitation service providers and healthcare professionals for a  
24 22 prioritisation of rehabilitation and a stronger and prompt involvement of rehabilitation  
25 23 professionals on all levels of the continuum of care. This includes international humanitarian  
26 24 interventions as well as local health system governance. In addition, it is crucial that future  
27 25 research identifies and tests efficient, innovative, context-adapted best practice models  
28 26 including service provision and impact measurement to address the mismatch of  
29 27 rehabilitation needs and resources in fragile settings.

30 28  
31 29  
32  
33  
34  
35  
36  
37  
38  
39  
40  
41  
42  
43  
44  
45  
46  
47  
48  
49  
50  
51  
52  
53  
54  
55  
56  
57  
58  
59  
60

only

1  
2  
3 1 FUNDING  
4

---

5 2 This research received no specific grant from any funding agency in the public, commercial  
6 3 or not-for-profit sectors.

7 4 ICRC and Linköping University sponsored research group meetings for study design and data  
8 5 analysis at University College Dublin.  
9 6

10 7 COMPETING INTERESTS  
11

---

12 8 None declared  
13 9

14 10 ACKNOWLEDGEMENTS  
15

---

16 11 We would like to thank the ICRC personnel and PRC managers in the respective countries for  
17 12 advice and insights in data interpretation: Alberto Cairo and team from Afghanistan, Denver  
18 13 Graham, Phalla Keo and team from Cambodia, Therese Powell, Srood Suad Nafie and team  
19 14 from Iraq, Imad Aldibee and team from Sudan.  
20 15

21 16 CONTRIBUTORSHIP STATEMENT  
22

---

23 17 All six authors contributed to planning, conduct and reporting of the study.  
24 18

25 19 Specific additional contributions are as follows:  
26 20

27 21 Cornelia A. Barth: literature research, data acquisition and analysis, conception and design,  
28 22 data interpretation  
29 23

30 24 Andreas Wladis: conception and design, data interpretation  
31 25

32 26 Catherine Blake: conception and design, data analysis and interpretation  
33 27

34 28 Sigiriya Aebischer Perone: literature research, data interpretation  
35 29

36 30 Prashant Bhandarkar: data tabulation, analysis and interpretation  
37 31

38 32 Cliona O'Sullivan: literature research, conception and design, data interpretation  
39 33

40 34 DATA AVAILABILITY STATEMENT  
41

---

42 35 All relevant data are included in the tables of this study.  
43 36

44 37 Due to the sensitive nature of this data, data sharing is subject to regulations of ICRC data  
45 38 protection policy.  
46 39  
47 40  
48 41  
49 42  
50 43  
51 44  
52 45  
53 46  
54 47  
55 48  
56 49  
57 50  
58 51  
59 52  
60 53

1  
2  
3 1 REFERENCES  
4

---

- 5 2 1 Narres M, Kvitkina T, Claessen H, *et al.* Incidence of lower extremity amputations in  
6 3 the diabetic compared with the non-diabetic population: A systematic review. *PLoS*  
7 4 *One* 2017; **12**: e0182081.
- 8 5 2 Global Lower Extremity Amputation Study Group. Epidemiology of lower extremity  
9 6 amputation in centres in Europe, North America, and East Asia. *Br J Surg* 2000; **87**:  
10 7 328–37.
- 11 8 3 Wachtel MS. Family poverty accounts for differences in lower-extremity amputation  
12 9 rates of minorities 50 years old or more with diabetes. *J Natl Med Assoc* 2005; **97**:  
13 10 334–8.
- 14 11 4 Mathieu L, Marty A, Ramaki A, *et al.* Current issues with lower extremity amputations  
15 12 in a country at war: Experience from the national military hospital of Kabul. *Eur J*  
16 13 *Trauma Emerg Surg* 2014; **40**: 387–93.
- 17 14 5 World Health Assembly. World Health Assembly Resolution 71.8. Improving Access to  
18 15 Assistive Technology. 2018.
- 19 16 6 International Committee of the Red Cross. Prosthetic Gait Analysis for  
20 17 Physiotherapists. Geneva: International Committee of the Red Cross, 2014.
- 21 18 7 World Health Assembly. World Health Assembly Resolution 74. 8. The highest  
22 19 attainable standard of health for persons with disabilities. 2021.
- 23 20 8 McPherson A, Durham J, Richards N, Gouda H, Rampatige R, Whittaker M.  
24 21 Strengthening health information systems for disability-related rehabilitation in  
25 22 LMICs. *Health Policy Plan* 2017; **32**: 384–94.
- 26 23 9 Nugraha B, Setyono GR, Defi IR, Gutenbrunner C. Strengthening rehabilitation services  
27 24 in Indonesia: A brief situation analysis. *J Rehabil Med* 2018; **50**: 377–83.
- 28 25 10 Borg J, Larsson S, Östergren PO, Rahman AA, Bari N, Khan AN. Assistive technology use  
29 26 and human rights enjoyment: A cross-sectional study in Bangladesh. *BMC Int Health*  
30 27 *Hum Rights* 2012; **12**: 1–11.
- 31 28 11 Skempes D, Stucki G, Bickenbach J. Health-Related Rehabilitation and Human Rights:  
32 29 Analyzing States' Obligations Under the United Nations Convention on the Rights of  
33 30 Persons with Disabilities. *Arch Phys Med Rehabil* 2015; **96**: 163–73.
- 34 31 12 Skempes D, Bickenbach J. Strengthening rehabilitation for people with disabilities: A  
35 32 human rights approach as the essential next step to accelerating global progress. *Am J*  
36 33 *Phys Med Rehabil* 2015; **94**: 823–8.
- 37 34 13 Toro-Hernández ML, Kankipati P, Goldberg M, Contepomi S, Tsukimoto DR, Bray N.  
38 35 Appropriate Assistive Technology for Developing Countries. *Phys Med Rehabil Clin N*  
39 36 *Am* 2019; **30**: 847–65.
- 40 37 14 World Health Organization. Emergency medical teams: Minimum technical standards  
41 38 and recommendations for rehabilitation. Geneva: World Health Organization, 2016  
42 39 <https://apps.who.int/iris/handle/10665/252809> (accessed July 10, 2019).
- 43 40 15 Lathia C, Skelton P, Clift Z (editors). Early Rehabilitation in Conflicts and Disasters.  
44 41 2020 [https://hi.org/sn\\_uploads/document/36199-Humanity--Inclusion-Clinical-](https://hi.org/sn_uploads/document/36199-Humanity--Inclusion-Clinical-Handbook-web_1.pdf)  
45 42 [Handbook-web\\_1.pdf](https://hi.org/sn_uploads/document/36199-Humanity--Inclusion-Clinical-Handbook-web_1.pdf) (accessed June 23, 2021).
- 46 43 16 World Health Organization. Access to Rehabilitation in Primary Health Care: an  
47 44 ongoing challenge. *Tech Ser Prim Heal Care* 2018; : 1–27.
- 48 45 17 World Health Organization. WHO standards for prosthetics and orthotics. Geneva,  
49 46 2017  
50 47 <http://apps.who.int/bookorders.%0Ahttp://apps.who.int/iris/bitstream/10665/25920>

- 9/1/9789241512480-part1-eng.pdf?ua=1.
- 18 World Health Organization. Rehabilitation 2030: A call for action. The need to scale up rehabilitation. 2017.
  - 19 Humanity & Inclusion; Global Rehabilitation Alliance. Rehabilitation for the realisation of human rights and inclusive development. 2019.
  - 20 Krueger CA, Wenke JC, Ficke JR. Ten years at war: Comprehensive analysis of amputation trends. *J Trauma Acute Care Surg* 2012; **73**: S438–44.
  - 21 Christensen J, Ipsen T, Doherty P, Langberg H. Physical and social factors determining quality of life for veterans with lower-limb amputation(s): a systematic review. *Disabil Rehabil* 2016; **38**: 2345–53.
  - 22 Dougherty PJ, McFarland L V., Smith DG, Reiber GE. Combat-incurred bilateral transfemoral limb loss: A comparison of the Vietnam War to the wars in Afghanistan and Iraq. *J Trauma Acute Care Surg* 2012; **73**: 1590–5.
  - 23 Ebrahimzadeh MH, Moradi A, Khorasani MR, *et al*. Long-term clinical outcomes of war-related bilateral lower extremities amputations. *Inj Int J Care Inj* 2015; **46**: 275–81.
  - 24 Jain RP, Meteke S, Gaffey MF, *et al*. Delivering trauma and rehabilitation interventions to women and children in conflict settings: A systematic review. *BMJ Glob Heal* 2020; **5**: 1980.
  - 25 James SL, Abate D, Abate KH, *et al*. Global, regional, and national incidence, prevalence, and years lived with disability for 354 diseases and injuries for 195 countries and territories, 1990–2017: a systematic analysis for the Global Burden of Disease Study 2017. *Lancet* 2018; **392**: 1789–858.
  - 26 Aziz ARA, Alsabek MB. Diabetic foot and disaster; risk factors for amputation during the Syrian crisis. *J Diabetes Complications* 2020; **34**: 107493.
  - 27 World Health Organization. Global Status Report on Road Safety 2018. Geneva: World Health Organisation, 2018.
  - 28 Barth CA, Wladis A, Blake C, Bhandarkar P, O’Sullivan C. Users of rehabilitation services in 14 countries and territories affected by conflict, 1988–2018. *Bull World Health Organ* 2020; **98**: 599–614.
  - 29 International Committee of the Red Cross. Physical Rehabilitation Programme. Annual Report 2019. Geneva, 2020.
  - 30 International Committee of the Red Cross. The ICRC’s mission statement. 2008. <https://www.icrc.org/en/doc/resources/documents/misc/icrc-mission-190608.htm>.
  - 31 International Committee of the Red Cross. Protracted conflict and humanitarian action: some recent ICRC experiences. Geneva, 2016 [https://www.icrc.org/sites/default/files/document/file\\_list/protracted\\_conflict\\_and\\_humanitarian\\_action\\_icrc\\_report\\_lr\\_29.08.16.pdf](https://www.icrc.org/sites/default/files/document/file_list/protracted_conflict_and_humanitarian_action_icrc_report_lr_29.08.16.pdf) (accessed July 10, 2019).
  - 32 The World Bank. World Bank Country and Lending Groups. World Bank. 2021. <https://datahelpdesk.worldbank.org/knowledgebase/articles/906519-world-bank-country-and-lending-groups> (accessed June 18, 2021).
  - 33 United Nations Development Programme. Human Development Reports. <http://hdr.undp.org/en/countries> (accessed June 21, 2021).
  - 34 World Health Organization. Countries. <https://www.who.int/data/gho/data/countries> (accessed June 21, 2021).
  - 35 International Committee of the Red Cross. What is the ICRC doing to reduce the effects of weapon contamination? 2017.

1  
2  
3  
4  
5  
6  
7  
8  
9  
10  
11  
12  
13  
14  
15  
16  
17  
18  
19  
20  
21  
22  
23  
24  
25  
26  
27  
28  
29  
30  
31  
32  
33  
34  
35  
36  
37  
38  
39  
40  
41  
42  
43  
44  
45  
46  
47  
48  
49  
50  
51  
52  
53  
54  
55  
56  
57  
58  
59  
60

- 1 <https://www.icrc.org/en/document/overview-mine-action> (accessed June 21, 2020).
- 2 36 Apelqvist J, Larsson J. What is the most effective way to reduce incidence of
- 3 37 amputation in the diabetic foot? *Diabetes Metab Res Rev* 2000; **16 Suppl 1**: S75-83.
- 4 38 Ndip A, Jude EB. Emerging evidence for neuroischemic diabetic foot ulcers: Model of
- 5 39 care and how to adapt practice. *Int J Low Extrem Wounds* 2009; **8**: 82–4.
- 6 40 Wang A, Lv G, Cheng X, *et al*. Guidelines on multidisciplinary approaches for the
- 7 41 prevention and management of diabetic foot disease (2020 edition). *Burn Trauma*
- 8 42 2020; **8**: 17.
- 9 43 Stevens GA, Alkema L, Black RE, *et al*. Guidelines for Accurate and Transparent Health
- 10 44 Estimates Reporting: the GATHER statement. *Lancet* 2016; **388**: e19–23.
- 11 45 Webster JB. Lower Limb Amputation Care Across the Active Duty Military and Veteran
- 12 46 Populations. *Phys Med Rehabil Clin N Am* 2019; **30**: 89–109.
- 13 47 Shaw J, Challa S, Conway D, *et al*. Quality of life and complications in lower limb
- 14 48 amputees in Tanzania: results from a pilot study. *Lancet Glob Heal* 2018; **6**: S18.
- 15 49 Andregård E, Magnusson L. Experiences of attitudes in Sierra Leone from the
- 16 50 perspective of people with poliomyelitis and amputations using orthotics and
- 17 51 prosthetics. *Disabil Rehabil* 2017; **39**: 2619–25.
- 18 52 Godlwana L, Nadasan T, Puckree T. Global Trends in Incidence of Lower Limb
- 19 53 Amputation : A review of the literature. *SA J Physiother* 2008; **64**: 1–5.
- 20 54 Carinci F, Massi Benedetti M, Klazinga NS, Uccioli L. Lower extremity amputation rates
- 21 55 in people with diabetes as an indicator of health systems performance. A critical
- 22 56 appraisal of the data collection 2000–2011 by the Organization for Economic
- 23 57 Cooperation and Development (OECD). *Acta Diabetol* 2016; **53**: 825–32.
- 24 58 Santini H. Rebirth of the health-care system in Cambodia. *Lancet* 2002; **360**: s57-8.
- 25 59 Ferguson AD, Richie BS, Gomez MJ. Psychological factors after traumatic amputation
- 26 60 in landmine survivors: The bridge between physical healing and full recovery. *Disabil Rehabil* 2004; **26**: 931–8.
- 27 61 Heikkinen M, Saarinen J, Suominen VP, Virkkunen J, Salenius J. Lower limb
- 28 62 amputations: Differences between the genders and long-term survival. *Prosthet*
- 29 63 *Orthot Int* 2007; **31**: 277–86.
- 30 64 Giannou C, Baldan M, Molde A. War Surgery: Working With Limited Resources in
- 31 65 Armed Conflict and Other Situations of Violence (Volume 2). Geneva, 2013.
- 32 66 Muhrbeck M, Holmgren K, Osman Z, von Schreeb J, Wladis A, Andersson P. Trends in
- 33 67 Demographics and Surgical Treatment of Weapon-Related Limb Injuries Over Two
- 34 68 Decades in a Resource-Scarce Setting. *World J Surg* 2019; **43**: 2681–8.
- 35 69 Muzaffar N, Mansoor I, Hafeez A, Margoob M. Psychiatric comorbidity in amputees
- 36 70 with average sociodemographic status and the role of theologic and family support in
- 37 71 a conflict zone. *Australas J Disaster Trauma Stud* 2012; **2012**: 31–8.
- 38 72 International Campaign to Ban Landmines – Cluster Munition Coalition (ICBL-CMC).
- 39 73 Landmine Monitor 2020. 2020 <http://www.the-monitor.org/en-gb/reports/2020/landmine-monitor-2020.aspx>.
- 40 74 Dietrich I, Braga GA, de Melo FG, da Costa Silva ACC. The Diabetic Foot as a Proxy
- 41 75 for Cardiovascular Events and Mortality Review. *Curr Atheroscler Rep* 2017; **19**: 44.
- 42 76 United Nations. Goal 3 | Department of Economic and Social Affairs | Sustainable
- 43 77 Developmet | Targets and Indicators. 2015. <https://sdgs.un.org/goals/goal3> (accessed
- 44 78 June 14, 2021).
- 45 79 Tesema AG, Ajisegiri WS, Abimbola S, *et al*. How well are non-communicable disease

- 1  
2  
3 1 services being integrated into primary health care in Africa: A review of progress  
4 2 against World Health Organization's African regional targets. *PLoS One* 2020; **15**.  
5 3 DOI:10.1371/journal.pone.0240984.  
6 4  
7 4 55 Ephraim PL, Dillingham TR, Sector M, Pezzin LE, MacKenzie EJ. Epidemiology of limb  
8 5 loss and congenital limb deficiency: A review of the literature. *Arch Phys Med Rehabil*  
9 6 2003; **84**: 747–61.  
10 7 56 Varma P, Stineman MG, Dillingham TR. Epidemiology of Limb Loss. *Phys Med Rehabil*  
11 8 *Clin N Am* 2014; **25**: 1–8.  
12 9 57 Dillingham TR, Pezzin LE, Mackenzie EJ. Incidence, acute care length of stay, and  
13 10 discharge to rehabilitation of traumatic amputee patients: An epidemiologic study.  
14 11 *Arch Phys Med Rehabil* 1998; **79**: 279–87.  
15 12 58 Sen G, Östlin P. Gender inequity in health: why it exists and how we can change it.  
16 13 *Glob Public Health* 2008; **3**: 1–12.  
17 14 59 Cieza A, Causey K, Kamenov K, Hanson SW, Chatterji S, Vos T. Global estimates of the  
18 15 need for rehabilitation based on the Global Burden of Disease study 2019: a  
19 16 systematic analysis for the Global Burden of Disease Study 2019. *Lancet* 2020; **396**:  
20 17 2006–17.  
21 18  
22 19  
23  
24  
25  
26  
27  
28  
29  
30  
31  
32  
33  
34  
35  
36  
37  
38  
39  
40  
41  
42  
43  
44  
45  
46  
47  
48  
49  
50  
51  
52  
53  
54  
55  
56  
57  
58  
59  
60

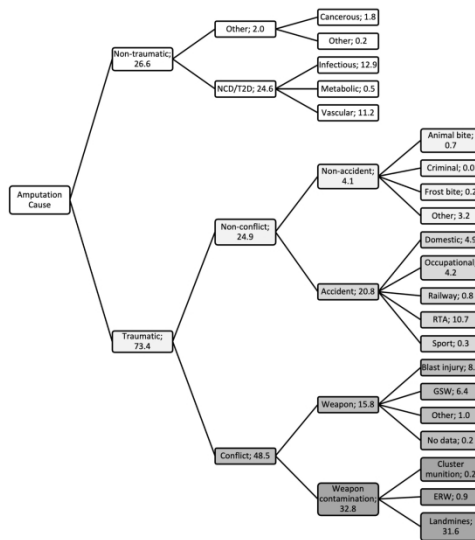

Figure 1. Classification of amputation causes with % of total persons with amputations  
 All 21 variables on the right are as they appear in mandatory dropdown lists of the database. The database distinguishes between (i) traumatic and all other causes; (ii) conflict-related and all other traumatic causes; (iii) weapon-contamination and all other conflict-related causes; all additional categories were created based on the original 21 variables. NCD/T2D = cause likely linked to non-communicable disease (NCD) or type 2 diabetes mellitus (T2D) complications; RTA= road traffic accident; GSW= Gunshot wound; No data = software error; ERW= explosive remnants of war

266x143mm (300 x 300 DPI)

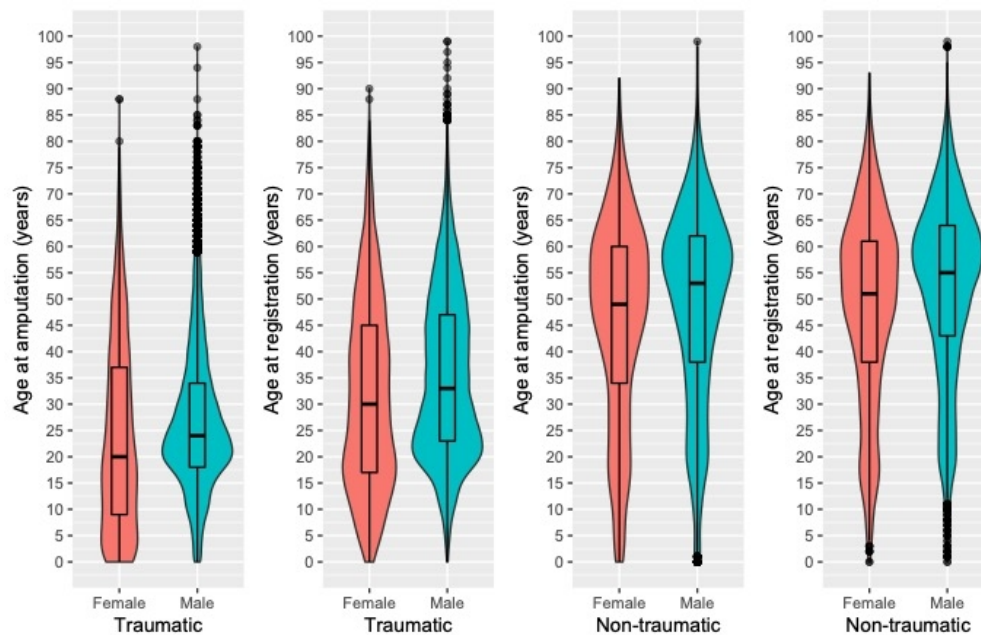

Figure 2. Age patterns of male and female persons with traumatic and non-traumatic amputation  
Violin plots showing age of all male and female PwA of a) traumatic cause at time of amputation, b) at time  
of registration, age of male and female PwA of c) non-traumatic cause at time of amputation, d) at time of  
registration.

242x155mm (72 x 72 DPI)



**The RECORD statement – checklist of items, extended from the STROBE statement, that should be reported in observational studies using routinely collected health data.**

|                           | Item No. | STROBE items                                                                                                                                                                               | Location in manuscript where items are reported | RECORD items                                                                                                                                                                                                                                                                                                                                                                                                                                | Location in manuscript where items are reported |
|---------------------------|----------|--------------------------------------------------------------------------------------------------------------------------------------------------------------------------------------------|-------------------------------------------------|---------------------------------------------------------------------------------------------------------------------------------------------------------------------------------------------------------------------------------------------------------------------------------------------------------------------------------------------------------------------------------------------------------------------------------------------|-------------------------------------------------|
| <b>Title and abstract</b> |          |                                                                                                                                                                                            |                                                 |                                                                                                                                                                                                                                                                                                                                                                                                                                             |                                                 |
|                           | 1        | (a) Indicate the study’s design with a commonly used term in the title or the abstract (b) Provide in the abstract an informative and balanced summary of what was done and what was found |                                                 | RECORD 1.1: The type of data used should be specified in the title or abstract. When possible, the name of the databases used should be included.<br><br>RECORD 1.2: If applicable, the geographic region and timeframe within which the study took place should be reported in the title or abstract.<br><br>RECORD 1.3: If linkage between databases was conducted for the study, this should be clearly stated in the title or abstract. | Page 2<br><br>Page 2<br><br>-                   |
| <b>Introduction</b>       |          |                                                                                                                                                                                            |                                                 |                                                                                                                                                                                                                                                                                                                                                                                                                                             |                                                 |
| Background rationale      | 2        | Explain the scientific background and rationale for the investigation being reported                                                                                                       |                                                 |                                                                                                                                                                                                                                                                                                                                                                                                                                             | Page 4-5                                        |
| Objectives                | 3        | State specific objectives, including any prespecified hypotheses                                                                                                                           |                                                 |                                                                                                                                                                                                                                                                                                                                                                                                                                             | Page 5                                          |
| <b>Methods</b>            |          |                                                                                                                                                                                            |                                                 |                                                                                                                                                                                                                                                                                                                                                                                                                                             |                                                 |
| Study Design              | 4        | Present key elements of study design early in the paper                                                                                                                                    |                                                 |                                                                                                                                                                                                                                                                                                                                                                                                                                             | Page 5                                          |
| Setting                   | 5        | Describe the setting, locations, and relevant dates, including periods of recruitment, exposure, follow-up, and data collection                                                            |                                                 |                                                                                                                                                                                                                                                                                                                                                                                                                                             | Page 5                                          |

|                              |   |                                                                                                                                                                                                                                                                                                                                                                                                                                                                                                                                                                                                                                                                                                                              |  |                                                                                                                                                                                                                                                                                                                                                                                                                                                                                                                                                                                                                                                                                                      |                  |
|------------------------------|---|------------------------------------------------------------------------------------------------------------------------------------------------------------------------------------------------------------------------------------------------------------------------------------------------------------------------------------------------------------------------------------------------------------------------------------------------------------------------------------------------------------------------------------------------------------------------------------------------------------------------------------------------------------------------------------------------------------------------------|--|------------------------------------------------------------------------------------------------------------------------------------------------------------------------------------------------------------------------------------------------------------------------------------------------------------------------------------------------------------------------------------------------------------------------------------------------------------------------------------------------------------------------------------------------------------------------------------------------------------------------------------------------------------------------------------------------------|------------------|
| Participants                 | 6 | <p>(a) <i>Cohort study</i> - Give the eligibility criteria, and the sources and methods of selection of participants. Describe methods of follow-up</p> <p><i>Case-control study</i> - Give the eligibility criteria, and the sources and methods of case ascertainment and control selection. Give the rationale for the choice of cases and controls</p> <p><i>Cross-sectional study</i> - Give the eligibility criteria, and the sources and methods of selection of participants</p> <p>(b) <i>Cohort study</i> - For matched studies, give matching criteria and number of exposed and unexposed</p> <p><i>Case-control study</i> - For matched studies, give matching criteria and the number of controls per case</p> |  | <p>RECORD 6.1: The methods of study population selection (such as codes or algorithms used to identify subjects) should be listed in detail. If this is not possible, an explanation should be provided.</p> <p>RECORD 6.2: Any validation studies of the codes or algorithms used to select the population should be referenced. If validation was conducted for this study and not published elsewhere, detailed methods and results should be provided.</p> <p>RECORD 6.3: If the study involved linkage of databases, consider use of a flow diagram or other graphical display to demonstrate the data linkage process, including the number of individuals with linked data at each stage.</p> | Page 5<br>-<br>- |
| Variables                    | 7 | Clearly define all outcomes, exposures, predictors, potential confounders, and effect modifiers. Give diagnostic criteria, if applicable.                                                                                                                                                                                                                                                                                                                                                                                                                                                                                                                                                                                    |  | RECORD 7.1: A complete list of codes and algorithms used to classify exposures, outcomes, confounders, and effect modifiers should be provided. If these cannot be reported, an explanation should be provided.                                                                                                                                                                                                                                                                                                                                                                                                                                                                                      | -                |
| Data sources/<br>measurement | 8 | For each variable of interest, give sources of data and details of methods of assessment (measurement). Describe comparability of assessment methods if there is more than one group                                                                                                                                                                                                                                                                                                                                                                                                                                                                                                                                         |  |                                                                                                                                                                                                                                                                                                                                                                                                                                                                                                                                                                                                                                                                                                      | Page 5-6         |

|                                                                                                                                                    |                                  |    |                                                                                                                                                                                                                                                                                                                                                                                                                                                                                                                                                                      |                                                                                                                                                       |          |
|----------------------------------------------------------------------------------------------------------------------------------------------------|----------------------------------|----|----------------------------------------------------------------------------------------------------------------------------------------------------------------------------------------------------------------------------------------------------------------------------------------------------------------------------------------------------------------------------------------------------------------------------------------------------------------------------------------------------------------------------------------------------------------------|-------------------------------------------------------------------------------------------------------------------------------------------------------|----------|
| 1<br>2<br>3<br>4                                                                                                                                   | Bias                             | 9  | Describe any efforts to address potential sources of bias                                                                                                                                                                                                                                                                                                                                                                                                                                                                                                            |                                                                                                                                                       | Page 6   |
| 5<br>6<br>7<br>8<br>9                                                                                                                              | Study size                       | 10 | Explain how the study size was arrived at                                                                                                                                                                                                                                                                                                                                                                                                                                                                                                                            |                                                                                                                                                       | Page 5   |
| 10<br>11<br>12<br>13<br>14<br>15<br>16<br>17<br>18<br>19<br>20<br>21<br>22<br>23<br>24<br>25<br>26<br>27<br>28<br>29<br>30<br>31<br>32<br>33<br>34 | Quantitative variables           | 11 | Explain how quantitative variables were handled in the analyses. If applicable, describe which groupings were chosen, and why                                                                                                                                                                                                                                                                                                                                                                                                                                        |                                                                                                                                                       | Page 5-6 |
| 35<br>36<br>37<br>38<br>39<br>40<br>41<br>42<br>43<br>44                                                                                           | Statistical methods              | 12 | (a) Describe all statistical methods, including those used to control for confounding<br>(b) Describe any methods used to examine subgroups and interactions<br>(c) Explain how missing data were addressed<br>(d) <i>Cohort study</i> - If applicable, explain how loss to follow-up was addressed<br><i>Case-control study</i> - If applicable, explain how matching of cases and controls was addressed<br><i>Cross-sectional study</i> - If applicable, describe analytical methods taking account of sampling strategy<br>(e) Describe any sensitivity analyses |                                                                                                                                                       | Page 6   |
| 45<br>46<br>47                                                                                                                                     | Data access and cleaning methods |    | ..                                                                                                                                                                                                                                                                                                                                                                                                                                                                                                                                                                   | RECORD 12.1: Authors should describe the extent to which the investigators had access to the database population used to create the study population. | Page 5-6 |

|                  |    |                                                                                                                                                                                                                                                                                                                                                 |  |                                                                                                                                                                                                                                                                                                                    |                       |
|------------------|----|-------------------------------------------------------------------------------------------------------------------------------------------------------------------------------------------------------------------------------------------------------------------------------------------------------------------------------------------------|--|--------------------------------------------------------------------------------------------------------------------------------------------------------------------------------------------------------------------------------------------------------------------------------------------------------------------|-----------------------|
|                  |    |                                                                                                                                                                                                                                                                                                                                                 |  | RECORD 12.2: Authors should provide information on the data cleaning methods used in the study.                                                                                                                                                                                                                    | Page 5-6              |
| Linkage          |    | ..                                                                                                                                                                                                                                                                                                                                              |  | RECORD 12.3: State whether the study included person-level, institutional-level, or other data linkage across two or more databases. The methods of linkage and methods of linkage quality evaluation should be provided.                                                                                          | -                     |
| <b>Results</b>   |    |                                                                                                                                                                                                                                                                                                                                                 |  |                                                                                                                                                                                                                                                                                                                    |                       |
| Participants     | 13 | (a) Report the numbers of individuals at each stage of the study ( <i>e.g.</i> , numbers potentially eligible, examined for eligibility, confirmed eligible, included in the study, completing follow-up, and analysed)<br>(b) Give reasons for non-participation at each stage.<br>(c) Consider use of a flow diagram                          |  | RECORD 13.1: Describe in detail the selection of the persons included in the study ( <i>i.e.</i> , study population selection) including filtering based on data quality, data availability and linkage. The selection of included persons can be described in the text and/or by means of the study flow diagram. | Page 7-15 incl tables |
| Descriptive data | 14 | (a) Give characteristics of study participants ( <i>e.g.</i> , demographic, clinical, social) and information on exposures and potential confounders<br>(b) Indicate the number of participants with missing data for each variable of interest<br>(c) <i>Cohort study</i> - summarise follow-up time ( <i>e.g.</i> , average and total amount) |  |                                                                                                                                                                                                                                                                                                                    | Page 7-15 incl tables |
| Outcome data     | 15 | <i>Cohort study</i> - Report numbers of outcome events or summary measures over time<br><i>Case-control study</i> - Report numbers in each exposure                                                                                                                                                                                             |  |                                                                                                                                                                                                                                                                                                                    | -                     |

|                   |    |                                                                                                                                                                                                                                                                                                                                                                                                                 |  |                                                                                                                                                                                                                                                                                                          |                       |
|-------------------|----|-----------------------------------------------------------------------------------------------------------------------------------------------------------------------------------------------------------------------------------------------------------------------------------------------------------------------------------------------------------------------------------------------------------------|--|----------------------------------------------------------------------------------------------------------------------------------------------------------------------------------------------------------------------------------------------------------------------------------------------------------|-----------------------|
|                   |    | category, or summary measures of exposure<br><i>Cross-sectional study</i> - Report numbers of outcome events or summary measures                                                                                                                                                                                                                                                                                |  |                                                                                                                                                                                                                                                                                                          |                       |
| Main results      | 16 | (a) Give unadjusted estimates and, if applicable, confounder-adjusted estimates and their precision (e.g., 95% confidence interval). Make clear which confounders were adjusted for and why they were included<br>(b) Report category boundaries when continuous variables were categorized<br>(c) If relevant, consider translating estimates of relative risk into absolute risk for a meaningful time period |  |                                                                                                                                                                                                                                                                                                          | Page 7-15 incl tables |
| Other analyses    | 17 | Report other analyses done— e.g., analyses of subgroups and interactions, and sensitivity analyses                                                                                                                                                                                                                                                                                                              |  |                                                                                                                                                                                                                                                                                                          | Page 7-15 incl tables |
| <b>Discussion</b> |    |                                                                                                                                                                                                                                                                                                                                                                                                                 |  |                                                                                                                                                                                                                                                                                                          |                       |
| Key results       | 18 | Summarise key results with reference to study objectives                                                                                                                                                                                                                                                                                                                                                        |  |                                                                                                                                                                                                                                                                                                          | Page 15-17            |
| Limitations       | 19 | Discuss limitations of the study, taking into account sources of potential bias or imprecision. Discuss both direction and magnitude of any potential bias                                                                                                                                                                                                                                                      |  | RECORD 19.1: Discuss the implications of using data that were not created or collected to answer the specific research question(s). Include discussion of misclassification bias, unmeasured confounding, missing data, and changing eligibility over time, as they pertain to the study being reported. | Page 17-18            |
| Interpretation    | 20 | Give a cautious overall interpretation of results considering objectives,                                                                                                                                                                                                                                                                                                                                       |  |                                                                                                                                                                                                                                                                                                          | Page 15-17            |

|                                                           |    |                                                                                                                                                               |  |                                                                                                                                                          |         |
|-----------------------------------------------------------|----|---------------------------------------------------------------------------------------------------------------------------------------------------------------|--|----------------------------------------------------------------------------------------------------------------------------------------------------------|---------|
|                                                           |    | limitations, multiplicity of analyses, results from similar studies, and other relevant evidence                                                              |  |                                                                                                                                                          |         |
| Generalisability                                          | 21 | Discuss the generalisability (external validity) of the study results                                                                                         |  |                                                                                                                                                          | Page 18 |
| <b>Other Information</b>                                  |    |                                                                                                                                                               |  |                                                                                                                                                          |         |
| Funding                                                   | 22 | Give the source of funding and the role of the funders for the present study and, if applicable, for the original study on which the present article is based |  |                                                                                                                                                          | Page 19 |
| Accessibility of protocol, raw data, and programming code |    | ..                                                                                                                                                            |  | RECORD 22.1: Authors should provide information on how to access any supplemental information such as the study protocol, raw data, or programming code. | Page 19 |

\*Reference: Benchimol EI, Smeeth L, Guttman A, Harron K, Moher D, Petersen I, Sørensen HT, von Elm E, Langan SM, the RECORD Working Committee. The REporting of studies Conducted using Observational Routinely-collected health Data (RECORD) Statement. *PLoS Medicine* 2015; in press.

\*Checklist is protected under Creative Commons Attribution ([CC BY](https://creativecommons.org/licenses/by/4.0/)) license.

# BMJ Open

## Retrospective observational study of characteristics of persons with amputations accessing International Committee of the Red Cross (ICRC) rehabilitation centres in five conflict and post-conflict countries

|                                 |                                                                                                                                                                                                                                                                                                                                                                                                                                                                                                                                                                                                                                                                                   |
|---------------------------------|-----------------------------------------------------------------------------------------------------------------------------------------------------------------------------------------------------------------------------------------------------------------------------------------------------------------------------------------------------------------------------------------------------------------------------------------------------------------------------------------------------------------------------------------------------------------------------------------------------------------------------------------------------------------------------------|
| Journal:                        | <i>BMJ Open</i>                                                                                                                                                                                                                                                                                                                                                                                                                                                                                                                                                                                                                                                                   |
| Manuscript ID                   | bmjopen-2021-049533.R2                                                                                                                                                                                                                                                                                                                                                                                                                                                                                                                                                                                                                                                            |
| Article Type:                   | Original research                                                                                                                                                                                                                                                                                                                                                                                                                                                                                                                                                                                                                                                                 |
| Date Submitted by the Author:   | 13-Oct-2021                                                                                                                                                                                                                                                                                                                                                                                                                                                                                                                                                                                                                                                                       |
| Complete List of Authors:       | Barth, Cornelia; University College Dublin, School of Public Health, Physiotherapy and Sports Science<br>Wladis, Andreas; Linköping University, Department of Biomedical and Clinical Sciences (BKV)<br>Blake, Catherine; University College Dublin, School of Public Health, Physiotherapy and Sports Science<br>Bhandarkar, Prashant; WHO collaborating centre for research in surgical needs in LMICs, BARC Hospital ; Tata Institute of Social Sciences School of Health Systems Studies,<br>Aebischer Perone, Sigirya; International Committee of the Red Cross,<br>O'Sullivan, Cliona; University College Dublin, School of Public Health, Physiotherapy and Sports Science |
| <b>Primary Subject Heading</b>: | Rehabilitation medicine                                                                                                                                                                                                                                                                                                                                                                                                                                                                                                                                                                                                                                                           |
| Secondary Subject Heading:      | Global health, Epidemiology, Health services research                                                                                                                                                                                                                                                                                                                                                                                                                                                                                                                                                                                                                             |
| Keywords:                       | REHABILITATION MEDICINE, TRAUMA MANAGEMENT, DIABETES & ENDOCRINOLOGY, EPIDEMIOLOGY, HEALTH SERVICES ADMINISTRATION & MANAGEMENT, PUBLIC HEALTH                                                                                                                                                                                                                                                                                                                                                                                                                                                                                                                                    |
|                                 |                                                                                                                                                                                                                                                                                                                                                                                                                                                                                                                                                                                                                                                                                   |

SCHOLARONE™  
Manuscripts



I, the Submitting Author has the right to grant and does grant on behalf of all authors of the Work (as defined in the below author licence), an exclusive licence and/or a non-exclusive licence for contributions from authors who are: i) UK Crown employees; ii) where BMJ has agreed a CC-BY licence shall apply, and/or iii) in accordance with the terms applicable for US Federal Government officers or employees acting as part of their official duties; on a worldwide, perpetual, irrevocable, royalty-free basis to BMJ Publishing Group Ltd ("BMJ") its licensees and where the relevant Journal is co-owned by BMJ to the co-owners of the Journal, to publish the Work in this journal and any other BMJ products and to exploit all rights, as set out in our [licence](#).

The Submitting Author accepts and understands that any supply made under these terms is made by BMJ to the Submitting Author unless you are acting as an employee on behalf of your employer or a postgraduate student of an affiliated institution which is paying any applicable article publishing charge ("APC") for Open Access articles. Where the Submitting Author wishes to make the Work available on an Open Access basis (and intends to pay the relevant APC), the terms of reuse of such Open Access shall be governed by a Creative Commons licence – details of these licences and which [Creative Commons](#) licence will apply to this Work are set out in our licence referred to above.

Other than as permitted in any relevant BMJ Author's Self Archiving Policies, I confirm this Work has not been accepted for publication elsewhere, is not being considered for publication elsewhere and does not duplicate material already published. I confirm all authors consent to publication of this Work and authorise the granting of this licence.



1  
2  
3 1 TITLE  
4

---

5 2 Retrospective observational study of characteristics of persons with amputations accessing  
6 3 International Committee of the Red Cross (ICRC) rehabilitation centres in five conflict and  
7 4 post-conflict countries  
8  
9  
10 5

11  
12 6 AUTHORS  
13

---

14 7 Corresponding author

15 8 Barth, Cornelia Anne

16 9 University College Dublin, School of Public Health, Physiotherapy and Sports Science

17 10 Dublin

18 11 Ireland

19 12 e-mail address c.a.barth@gmx.net

20 13 telephone +41 78 645 8919

21 14 Co-authors

22 15 Wladis, Andreas

23 16 Linköping University, Department of Biomedical and Clinical Sciences

24 17 Linköping

25 18 Sweden

26 19 Blake, Catherine

27 20 University College Dublin, School of Public Health, Physiotherapy and Sports Science

28 21 Dublin

29 22 Ireland

30 23 Bhandarkar, Prashant

31 24 WHO Collaborating Centre (WHOCC) for Research in Surgical Needs in LMICs, BARC

32 25 Hospital

33 26 Mumbai, Maharashtra, 400094

34 27 India

35 28 2<sup>nd</sup> affiliation

36 29 Tata Institute of Social Sciences School of Health Systems Studies,

37 30 Deonar, Maharashtra

38 31 India

39 32 Aebischer Perone, Sigiriya

40 33 International Committee of the Red Cross, Health unit,

41 34 Geneva

42 35 Switzerland

43 36 O'Sullivan, Cliona

44 37 University College Dublin, School of Public Health, Physiotherapy and Sports Science

45 38 Dublin

46 39 Ireland  
47 40  
48  
49  
50  
51  
52  
53  
54  
55  
56  
57  
58  
59  
60

1  
2  
3 1 TITLE  
4

---

5 2 Retrospective observational study of characteristics of persons with amputations accessing  
6 3 International Committee of the Red Cross (ICRC) rehabilitation centres in five conflict and  
7 4 post-conflict countries

8  
9  
10 5 ABSTRACT  
11

---

12 6 **Objectives:** Limb amputation incidence is particularly high in fragile contexts due to conflict,  
13 7 accidents and poorly managed diabetes. The study aim was to analyse i) demographic and  
14 8 amputation characteristics of persons with any type of acquired amputation (PwA) and ii)  
15 9 time between amputation and first access to rehabilitation in five conflict and post-conflict  
16 10 countries.

17  
18  
19 11 **Design:** A retrospective, observational study analyzing differences in demographic and  
20 12 clinical factors and time to access rehabilitation between users with traumatic and non-  
21 13 traumatic amputations.

22  
23  
24 14 **Setting:** Five countries with the highest numbers of PwA in the global ICRC database  
25 15 (Afghanistan, Cambodia, Iraq, Myanmar, Sudan). Cleaned and merged data from 2009-2018  
26 16 were aggregated by sex; age at amputation and registration; cause, combination and  
27 17 anatomical level of amputation(s); living environment.

28  
29  
30 18 **Participants:** All PwA newly attending rehabilitation.

31  
32 19 **Results:** Data for 28446 individuals were included (4329 [15.2%] female). Most were  
33 20 traumatic amputations (73.4%, 20890); of these, 48.6% (13801) were conflict related.  
34 21 Average age at traumatic amputation for men and women was 26.9 and 24.1 years  
35 22 respectively; for non-traumatic amputation it was 49.1 years and 45.9 years respectively. Sex  
36 23 differences in age were statistically significant for traumatic and non-traumatic causes  
37 24 ( $p < 0.001$ ,  $p = 0.003$ ). Delay between amputation and rehabilitation was on average 8.2 years  
38 25 for those with traumatic amputation, significantly higher than an average 3 years for those  
39 26 with non-traumatic amputation ( $p < 0.001$ ).

40  
41  
42  
43 27 **Conclusions:** Young age for traumatic and non-traumatic amputations indicates the  
44 28 devastating impact of war and fragile health systems on a society. Long delays between  
45 29 amputation and rehabilitation reveal the mismatch of needs and resources. For  
46 30 rehabilitation service providers in fragile settings, it is an enormous task to manage the  
47 31 diversity of PwA of various causes, age, sex and additional conditions. Improved  
48 32 collaboration between primary healthcare, surgical and rehabilitation services, a  
49 33 prioritisation of rehabilitation and increased resource provision are recommended to ensure  
50 34 adequate access to comprehensive rehabilitation care for PwA.

51 35

52 36

53

54

55

56

57

58

59

60

1  
2  
3 1 STRENGTHS AND LIMITATIONS OF THIS STUDY  
4

---

- 5 2 • To our knowledge, this is the first large multi-country study on a highly vulnerable and  
6 3 neglected group of persons with amputations seeking rehabilitation in conflict and post-  
7 4 conflict contexts.  
8 5 • Data originate from exceptionally challenging and diverse settings where providing  
9 6 rehabilitation and collecting data is complex and constantly challenged by the volatility  
10 7 of the environment.  
11 8 • Limitations include that data are derived from ICRC supported structures only and  
12 9 cannot make statements on overall population or on persons not attending services  
13  
14  
15  
16  
17  
18  
19

12 KEYWORDS

---

13 Rehabilitation  
14 Armed Conflicts  
15 Amputation  
16 Delivery of Health Care  
17 Diabetes Complications  
18  
19  
20

20 WORD COUNT

---

21 3961  
22  
23  
24  
25  
26  
27  
28  
29  
30  
31  
32  
33  
34  
35  
36  
37  
38  
39  
40  
41  
42  
43  
44  
45  
46  
47  
48  
49  
50  
51  
52  
53  
54  
55  
56  
57  
58  
59  
60

## 1 INTRODUCTION

---

2 Limb amputation is a life-changing event. Global incidence studies reveal a substantial lack of  
3 data from fragile contexts such as conflict-affected or low- and middle-income countries  
4 (LMICs), but research has shown that amputation incidence is higher in populations with low  
5 economic and educational status. This results in limited access to healthcare, even in high  
6 income countries (HIC).<sup>1-3</sup> People in fragile contexts are particularly at risk of amputation  
7 and many of them will have to cope without prosthetic care.<sup>4,5</sup> Appropriate rehabilitation  
8 and assistive technology (AT) have the potential to greatly diminish disability and allow the  
9 person to lead an independent, functional life.<sup>6,7</sup> It requires the availability of  
10 comprehensive, costly and lifelong services, which is an enormous challenge in such  
11 environments. Rehabilitation services should span from early physiotherapy to prosthetic  
12 fitting, psychosocial support and social reintegration measures. A lower extremity  
13 amputation (LEA) requires prosthetic renewal every three years, for children every six  
14 months.<sup>8</sup>

15 The World Health Assembly's 2018 resolution on improving access to AT and the 2021  
16 resolution on the highest attainable standard of health for persons with disabilities indicate  
17 the many shortcomings and the need for increased recognition in this field.<sup>5,9</sup>

18 Access to appropriate rehabilitation and AT is a human right enshrined in the Convention on  
19 the Rights of Persons with Disabilities. This recognition has resulted in publications  
20 discussing implications, implementation and sobering reality-checks in numerous LMICs.<sup>10-15</sup>  
21 Alarming needs and low supply are a well-known reality for global actors playing a key role in  
22 advocating for and providing rehabilitation in fragile settings including the International  
23 Committee of the Red Cross (ICRC), Humanity and Inclusion and the World Health  
24 Organisation (WHO). Guidelines, training resources and advocacy papers by such actors,  
25 often issued collectively, are specifically pointing out the importance and interdependence  
26 of early rehabilitation, AT and rehabilitation across the continuum of care.<sup>16-21</sup>

27 As such initiatives address knowledge gaps in this neglected field, their global  
28 implementation lags behind, even more so in countries of prolonged conflict or post-conflict  
29 with fragile health systems and a deprioritisation of rehabilitation services. As a  
30 consequence, there remains a lack of scientific papers on which to base further guideline  
31 development and research. This starts with affected populations in the countries themselves  
32 who remain largely unknown, contrary to the well-studied veterans from HIC who sustained  
33 conflict-related amputations abroad.<sup>22-24</sup> Complex traumatic amputations and their sequelae  
34 in conflict- and mine-affected areas are known to be a huge challenge.<sup>4,25,26</sup> Adding to this,  
35 and with profound consequences, is the increasing global burden of type two diabetes  
36 mellitus (T2D).<sup>27</sup>

37 Overstretched health systems, particularly in LMIC, lacking access to basic diabetic care and  
38 high rates of undiagnosed T2D increase the risk and incidence of amputations.<sup>28</sup> Road traffic  
39 (RTA) and other accidents are an additional problem in countries with limited traffic and  
40 occupational safety standards.<sup>29</sup>

41 Persons with amputations (PwA) constitute the biggest cohort of users accessing  
42 rehabilitation services supported by the ICRC in conflict and post-conflict states.<sup>30</sup> Assisting  
43 conflict affected populations is at the centre of the ICRC's humanitarian mission and serving

mine victims with limb loss is a core activity since the launch of its physical rehabilitation programme (PRP) in 1979.<sup>31,32</sup> Currently, the ICRC supports 152 rehabilitation structures in 35 countries offering multidisciplinary rehabilitation services for persons with physical disabilities and capacity building for rehabilitation workforce. With this support, 62172 persons worldwide were fitted with prostheses in 2019.<sup>31</sup> There is very little information on the characteristics of PwA accessing rehabilitation in fragile contexts. The overall aim of this study was to analyse characteristics of PwA accessing rehabilitation services in five ICRC contexts in 2009-2018 to better understand their healthcare needs and deduce implications for service provision. Specific aims were to explore differences in sex and age at amputation, at registration for rehabilitation, time between amputation and registration (delay), causes and characteristics of amputations.

## METHODS

---

### Design and setting

This retrospective observational study is an analysis of aggregated data. It reflects the records of all PwA registered from 2009 to 2018 in ICRC-supported physical rehabilitation centres (PRCs) in Afghanistan (n=7), Cambodia (n=2), Iraq (n=1), Myanmar (n= 5), and Sudan (n= 2). Data were extracted from an ICRC-developed electronic database described in a previous study.<sup>30</sup> The five countries representing the highest numbers of PwA attending PRCs were selected for this study, reflecting 92% of the total number of PwA in the database. Besides post-conflict Cambodia, the countries represent contexts of protracted crises and are classified by the World Bank as low-income (Afghanistan, Sudan), LMIC (Cambodia, Myanmar), or upper middle-income (Iraq).<sup>33,34</sup> These differences are equally reflected in other indicators as available from open source sites by the United Nations Development Programme and the WHO.<sup>35,36</sup>

Data reflect representative user populations in the studied countries to varying degrees depending on presence of other rehabilitation providers, or data management difficulties. All PRCs were located in urban areas.

### Participants

Participants include all persons with any type of acquired amputation newly attending for prosthetic fitting. Excluded were persons attending with congenital limb loss.

### Data collection and management

Upon registration, demographic and clinical characteristics were captured as part of routine documentation. The variables retrieved from the database were: country, sex, age at registration and at amputation, living environment, cause, anatomic level and number of amputation(s). PwA's living environment was subject to local definitions of the terms urban or rural. The quantitative variables were cleaned, merged, disaggregated by sex and age and organized into variables of interest.

1  
2  
3 1 Figure 1 lists the causes as retrieved from the database and shows how causes were  
4 2 categorised into traumatic or non-traumatic. Traumatic causes were further sub-categorised  
5 3 as non-conflict- or conflict-related. We examined non-conflict-related traumatic causes by  
6 4 accidental such as RTA or non-accidental causes such as animal bite. Conflict-related causes  
7 5 were separated into caused by weapons or by weapon-contamination, which encompasses  
8 6 the presence of mines, explosive remnants of war (ERW) and other sources of  
9 7 contamination.<sup>37</sup>

12 8 The database offered four labels for non-traumatic causes: cancerous, infectious, metabolic,  
13 9 or vascular. For analysis, these were merged, except cancer (merged with 'other'), and  
14 10 considered related to non-communicable diseases (NCD), potentially T2D.

16 11 For amputation characteristics, male and female PwA were counted by combinations of LEA  
17 12 and upper extremity amputations (UEA) and by non-traumatic versus traumatic causes. We  
18 13 distinguished six levels of UEA and six levels of LEA counting number of amputations (and  
19 14 not persons) per level.

### 16 16 **Data analysis**

17 17 The delay between amputation and registration to rehabilitation was calculated by  
18 18 subtracting the self-reported amputation date from the registration date as noted on the  
19 19 user file.

20 20 Age at registration was grouped into young child: under 5; child: 5–17; young adult: 18–34;  
21 21 adult: 35–59; older adult: over 60. Besides 'living environment' all selected variables were  
22 22 mandatory for data entry. Where software issues led to missing data, these were labelled  
23 23 'no data' in the tables.

24 24 Data analysis comprised of descriptive statistics. The software packages used were Microsoft  
25 25 Office Excel 2016, R (version 3.6.1), R Studio for windows (version 1.2.5001) and SPSS (IBM  
26 26 SPSS Statistics for Windows, Version 24.0. Armonk, NY: IBM Corp). Categorical data were  
27 27 summarised as counts and percentages across rows (sex) and columns (groups). Age at the  
28 28 time of amputation, registration and delay intervals were presented as means with 95%  
29 29 confidence intervals. Differences between groups were assessed using Chi Square and  
30 30 Mann-Whitney U tests. P values below 0.05 were considered statistically significant.

### 32 32 **Potential bias**

33 33 Data depended on the accuracy of self-report and recording of observations and  
34 34 assessments by PRC staff with varying professional training and subject to interpretation,  
35 35 hereby presenting potential biases. Variables such as sex and age are deemed robust.

36 36 Challenges exist when recording the cause of non-traumatic amputation presentations as  
37 37 PRCs are rarely attached to a medical service to diagnose underlying conditions.

38 38 Unless a PwA checks in with externally confirmed T2D diagnosis, PRC staff rely on findings  
39 39 from their own assessment. They record non-traumatic causes as predefined in the  
40 40 database, which does not offer T2D as a stand-alone variable, but 'infectious', 'metabolic' or  
41 41 'vascular' presentations. Chronic, often unknown health conditions in the studied countries  
42 42 lead to such presentations defined by PRC staff as amputation cause and are most likely  
43 43 related to NCD/T2D.<sup>38–40</sup> Considering the dimension and consequences of T2D prevalence  
44 44 we merged causes under this heading despite absence of confirmed diagnosis.

### **Ethical approval and data sharing**

Ethical exemption to conduct analysis on de-identified data was granted by the Swiss Ethics Committee Geneva [Reference number: REQ-2019-00027]. Data sharing agreements between the ICRC, Linköping University and University College Dublin were approved by each institution.

### **Patient and public involvement**

For this retrospective study of routinely collected data, patient involvement in study design did not apply. However, consultation with key stakeholders (PRC managers and personnel and ICRC expatriate staff) was conducted regarding study design and feasibility and contextual analysis of findings. Interpretation of the data was based on these stakeholders' profound understanding of the respective contexts. The main author CAB presented and discussed preliminary research results in an ongoing process, online and in person during project visits where involved rehabilitation providers did and will continue to play an active role in dissemination of the findings of this research.

The methods used and findings from the study are reported in line with the GATHER guidelines.<sup>41</sup>

## **RESULTS**

---

### **Participant characteristics**

A total of 28446 individual user files were analysed with 4329 (15.2%) female PwA. Most data relate to Afghanistan (12364 [43.5%]), followed by Myanmar (5267 [18.5%]), Sudan (5012 [17.6%]), Iraq (3491 [12.3%]), and Cambodia (2312 [8.1%]).

### **Age at time of amputation, age at registration, delay between amputation and registration**

Average age for traumatic amputation was 26.9 years in male, 24.1 years in female. For non-traumatic amputation it was 49.1 years in male, 45.9 years in female PwA. Average delay was significantly shorter in the non-traumatic group with 3 years compared to 8.2 years for those with traumatic amputation, (Table 1, Figure 2). In all countries, delay was lowest in young children (0.0–2.5 years) and highest for males over 60 with traumatic amputations (16.6–22.5 years), except for Afghanistan (10.5 years for males aged 35–59 and 10.3 years for those over 60).

1 Table 1. Age at time of amputation, age at registration, delay between amputation and registration

| Country   Variables                                 | Non-Traumatic Amputation |                  |          | Traumatic Amputation |                 |          | Total – by cause |                 |                   |           |
|-----------------------------------------------------|--------------------------|------------------|----------|----------------------|-----------------|----------|------------------|-----------------|-------------------|-----------|
|                                                     | Male                     | Female           | P value† | Male                 | Female          | P value† | Non-Trauma       | Trauma          | MD (95% CI)       | P value†† |
| Total                                               | Mean (95% CI)            |                  |          | Mean (95% CI)        |                 |          | Mean (95% CI)    |                 |                   |           |
| Age at amputation                                   | 49.1(48.6-49.6)          | 45.9(45.1-46.7)  | <0.001   | 26.9(26.7-27.1)      | 24.1(23.3-24.8) | <0.001   | 48.2(47.8-48.6)  | 26.6(26.4-26.8) | 21.7(21.3-22.1)   | <0.001    |
| Age at registration                                 | 52.2(51.8-52.7)          | 48.6(47.8-49.4)  | <0.001   | 35.2(35-35.4)        | 31.6(30.9-32.3) | <0.001   | 51.2(50.8-51.6)  | 34.8(34.6-35)   | 16.4(16.0-16.9)   | <0.001    |
| Delay all PwAs (y)                                  | 3.2(3.0-3.4)             | 2.7(2.4-3)       | 0.009    | 8.3(8.1-8.4)         | 7.5(7.1-8)      | 0.119    | 3.0(2.9-3.2)     | 8.2(8-8.3)      | -5.1(-5.4-4.9)    | <0.001    |
| <b>Delay by PwA age group (age at registration)</b> |                          |                  |          |                      |                 |          |                  |                 |                   |           |
| Young child (<5 y)                                  | 0.9(0.4-1.4)             | 1.3(0.8-1.8)     | 0.200    | 0.9(0.7-1.1)         | 1.0 (0.7-1.2)   | 0.745    | 1.1(0.7-1.4)     | 0.9(0.8-1.1)    | 0.1(-0.3-0.6)     | 0.327     |
| Child (5-17 y)                                      | 2.2(1.6-2.8)             | 2.2(1.5-2.8)     | 0.563    | 2.0 (1.9-2.2)        | 3.9(3.5-4.3)    | <0.001   | 2.2(1.8-2.6)     | 2.4(2.3-2.6)    | -0.3(-0.7-0.2)    | 0.092     |
| Young Adult (18-34 y)                               | 3.2(2.8-3.6)             | 3.1(2.5-3.7)     | 0.987    | 3.8(3.6-3.9)         | 7.2(6.6-7.8)    | <0.001   | 3.1(2.8-3.5)     | 4.1(3.9-4.2)    | -0.9(-1.3-0.5)    | 0.002     |
| Adult (35-59 y)                                     | 2.9(2.7-3.2)             | 2.6(2.1-3)       | 0.022    | 13.7(13.4-14)        | 9.9(9-10.8)     | <0.001   | 2.8(2.6-3.1)     | 13.3(13.1-13.6) | -10.5(-10.9-10.1) | <0.001    |
| Older Adult (>60 y)                                 | 3.5(3.1-3.9)             | 3(2.3-3.7)       | 0.071    | 16.9(16-17.7)        | 12.1(9.9-14.4)  | <0.001   | 3.4(3.1-3.7)     | 16.3(15.5-17.1) | -12.9(-13.7-12.2) | <0.001    |
| <b>Afghanistan</b>                                  |                          |                  |          |                      |                 |          |                  |                 |                   |           |
| Age at amputation                                   | 48.8(46.2-51.4)          | 42.7(39.4-46)    | <0.001   | 24.8(24.3-25.3)      | 20.6(19.4-21.8) | <0.001   | 46.8(44.8-48.9)  | 24.3(23.9-24.8) | 22.5(21.7-23.2)   | <0.001    |
| Age at registration                                 | 50.3(49.2-51.3)          | 44.0 (42.5-45.4) | <0.001   | 29.7(29.4-30)        | 26.6(25.6-27.6) | <0.001   | 48.3(47.4-49.1)  | 29.4(29.1-29.7) | 18.9(18.1-19.6)   | <0.001    |
| Delay all PwAs (y)                                  | 1.6(1.3-1.9)             | 1.3(1.0-1.6)     | 0.318    | 4.9(4.8-5.1)         | 6.0 (5.5-6.6)   | <0.001   | 1.5(1.2-1.7)     | 5.0 (4.9-5.2)   | -3.6(-4.0-3.2)    | <0.001    |
| <b>Delay by PwA age group (age at registration)</b> |                          |                  |          |                      |                 |          |                  |                 |                   |           |
| Young child (<5 y)                                  | 0.5(-0.2-1.2)            | 1.3(0.3-2.2)     | 0.214    | 0.9(0.6-1.1)         | 0.9(0.6-1.2)    | 0.829    | 0.8(0.2-1.3)     | 0.9(0.7-1.1)    | -0.1(-0.8-0.5)    | 0.618     |
| Child (5-17 y)                                      | 1.1(0.6-1.7)             | 1.6(0.8-2.4)     | 0.948    | 1.8(1.6-2.0)         | 3.9(3.4-4.4)    | <0.001   | 1.3(0.9-1.8)     | 2.2(2.1-2.4)    | -0.9(-1.5-0.3)    | <0.001    |
| Young Adult (18-34 y)                               | 3.0(2.2-3.8)             | 2.1(1.2-2.9)     | 0.827    | 3.1(2.9-3.2)         | 7.8(6.9-8.7)    | <0.001   | 2.7(2.0-3.3)     | 3.4(3.2-3.5)    | -0.7(-1.4-0.1)    | <0.001    |
| Adult (35-59 y)                                     | 1.4(0.9-1.9)             | 1(0.6-1.4)       | 0.551    | 10.5(10.0-11.0)      | 7.6(6.2-9.0)    | <0.001   | 1.2(0.9-1.6)     | 10.1(9.7-10.6)  | -8.9(-9.8-8.0)    | <0.001    |
| Older Adult (>60 y)                                 | 1.3(0.7-1.8)             | 1.1(0.3-1.9)     | 0.781    | 10.3(9.1-11.6)       | 4.6(2.3-6.8)    | 0.004    | 1.2(0.8-1.7)     | 9.7(8.5-10.9)   | -8.5(-9.6-7.4)    | <0.001    |
| <b>Cambodia</b>                                     |                          |                  |          |                      |                 |          |                  |                 |                   |           |
| Age at amputation                                   | 46(38.5-53.6)            | 41.6(31.1-52.0)  | 0.189    | 28.6(27.2-29.9)      | 31.3(27.3-35.3) | 0.100    | 44.7(38.6-50.8)  | 28.9(27.6-30.2) | 15.8(13.7-17.9)   | <0.001    |
| Age at registration                                 | 48.9(45.9-51.9)          | 45.3(40.3-50.3)  | 0.235    | 42.7(42.0-43.3)      | 40.3(38-42.7)   | 0.006    | 47.8(45.2-50.4)  | 42.4(41.8-43.0) | 5.4(3.2-7.6)      | <0.001    |
| Delay all PwAs (y)                                  | 2.9(1.8-4.0)             | 3.8(1.5-6.1)     | 0.285    | 14.0 (13.4-14.6)     | 9.3(7.8-10.8)   | <0.001   | 3.2(2.2-4.2)     | 13.4(12.9-14.0) | -10.2(-12.0-8.5)  | <0.001    |
| <b>Delay by PwA age group (age at registration)</b> |                          |                  |          |                      |                 |          |                  |                 |                   |           |
| Young child (<5 y)                                  | 2.5(1.5-3.5)##           | ..               | ..       | 1.0 (0.2-1.8)        | 0.0(0.0-0.0)##  | 0.267    | 2.5(1.5-3.5)     | 0.7(0.0-1.3)    | 1.8(0.2-3.4)      | 0.071     |
| Child (5-17 y)                                      | 9.5(-5.2-24.2)           | 4.6(0.4-8.7)     | 0.500    | 3.1(1.7-4.4)         | 3.7(1.3-6.2)    | 0.685    | 5.7(1.4-9.9)     | 3.2(2.1-4.4)    | 2.4(-1.2-6.0)     | 0.115     |
| Young Adult (18-34 y)                               | 4.3(2.0-6.6)             | 3.9(-0.1-7.8)    | 0.991    | 4.7(4.1-5.3)         | 6.2(4.2-8.1)    | 0.938    | 4.2(2.2-6.1)     | 4.9(4.3-5.5)    | -0.7(-2.9-1.5)    | 0.470     |
| Adult (35-59 y)                                     | 3.2(1.2-5.1)             | 3.1(0.4-5.8)     | 0.213    | 18.6(17.9-19.3)      | 10.9(8.7-13.2)  | <0.001   | 3.1(1.5-4.8)     | 17.9(17.2-18.5) | -14.7(-17.2-12.2) | <0.001    |
| Older Adult (>60 y)                                 | 1.2(0.0-3.2)             | 4.3(-1.9-10.6)   | 0.785    | 19.7(17.7-21.7)      | 15.2(9.9-20.5)  | 0.021    | 2.1(0.1-4.1)     | 18.9(17-20.8)   | -16.8(-20.5-13.1) | <0.001    |
| <b>Iraq</b>                                         |                          |                  |          |                      |                 |          |                  |                 |                   |           |
| Age at amputation                                   | 54.4(50.7-58.2)          | 53.9(48-59.9)    | 0.826    | 26.8(25.7-28.0)      | 25.6(22.2-29.0) | 0.023    | 54.3(51.2-57.5)  | 26.7(25.6-27.8) | 27.6(26.6-28.6)   | <0.001    |
| Age at registration                                 | 56.6(55.7-57.6)          | 55.3(53.5-57.1)  | 0.541    | 39.1(38.5-39.8)      | 33.6(31.3-35.8) | <0.001   | 56.3(55.4-57.1)  | 38.6(38-39.2)   | 17.7(16.6-18.7)   | <0.001    |
| Delay all PwAs (y)                                  | 2.2(1.8-2.7)             | 1.7(1-2.3)       | 0.007    | 12.3(11.8-12.8)      | 8.1(6.7-9.6)    | <0.001   | 2.1(1.7-2.4)     | 11.9(11.5-12.4) | -9.9(-10.6-9.1)   | <0.001    |
| <b>Delay by PwA age group (age at registration)</b> |                          |                  |          |                      |                 |          |                  |                 |                   |           |
| Young child (<5 y)                                  | 0.0(0.0-0.0)#            | 2.0(2.0-2.0)##   | 1.000    | 1.0 (0.4-1.6)        | 1.0(0.1-1.9)    | 0.961    | 1.0(-1.0-3.0)    | 1.0(0.5-1.5)    | 0(-1.7-1.7)       | 1.000     |
| Child (5-17 y)                                      | 4.1(1.2-7.1)             | 2.1(0-4.2)       | 0.285    | 2.9(2.2-3.5)         | 2.6(1.4-3.8)    | 0.756    | 3.1(1.3-5.0)     | 2.8(2.2-3.4)    | 0.3(-1.3-1.9)     | 0.316     |
| Young Adult (18-34 y)                               | 3.8(1.8-5.7)             | 1.3(0.2-2.3)     | 0.044    | 5.7(5.2-6.2)         | 7.6(5.5-9.7)    | 0.595    | 3.0(1.6-4.4)     | 5.9(5.4-6.3)    | -2.8(-4.7-1.0)    | <0.001    |



|  |                                                     |                           |                           |        |                             |                              |        |                 |                 |                   |        |
|--|-----------------------------------------------------|---------------------------|---------------------------|--------|-----------------------------|------------------------------|--------|-----------------|-----------------|-------------------|--------|
|  | Adult (35-59 y)                                     | 2.0(1.5-2.6)              | 1.4(0.7-2.1)              | 0.268  | 16.7(16-17.4)               | 11.0(8.1-13.9)               | <0.001 | 1.9(1.4-2.3)    | 16.3(15.6-17.0) | -14.4(-15.5-13.3) | <0.001 |
|  | Older Adult (>60 y)                                 | 2.2(1.5-2.8)              | 1.9(0.8-3.0)              | 0.043  | 21.2(19.1-23.2)             | 10.9(5.2-16.5)               | 0.008  | 2.1(1.6-2.7)    | 20.4(18.4-22.4) | -18.3(-19.8-16.8) | <0.001 |
|  | <b>Myanmar</b>                                      |                           |                           |        |                             |                              |        |                 |                 |                   |        |
|  | Age at amputation                                   | 46.7(43.7-49.8)           | 47.4(42.2-52.7)           | 0.069  | 29.6(28.6-30.5)             | 28.0 (25-31.1)               | 0.015  | 46.9(44.3-49.5) | 29.4(28.5-30.3) | 17.5(16.6-18.3)   | <0.001 |
|  | Age at registration                                 | 52.0(51.0-52.9)           | 51.8(50-53.6)             | 0.615  | 40.7(40.3-41.2)             | 38.3(36.6-40)                | 0.006  | 51.9(51.1-52.8) | 40.5(40.1-40.9) | 11.4(10.5-12.3)   | <0.001 |
|  | Delay all PwAs (y)                                  | 5.3(4.8-5.8)              | 4.3(3.4-5.3)              | <.001  | 11.2(10.8-11.5)             | 10.3(9.0-11.6)               | 0.007  | 5.0 (4.6-5.5)   | 11.1(10.8-11.5) | -6.1(-6.7-5.4)    | <0.001 |
|  | <b>Delay by PwA age group (age at registration)</b> |                           |                           |        |                             |                              |        |                 |                 |                   |        |
|  | Young child (<5 y)                                  | 1.0(1.0-1.0) <sup>#</sup> | 2.0(2.0-2.0) <sup>#</sup> | 1.000  | 2.0 (2.0-2.0) <sup>##</sup> | 2.5(1.0.5-3.5) <sup>##</sup> | 0.667  | 1.5(0.5-2.5)    | 2.3(1.8-2.7)    | -0.8(-2.1-0.6)    | 0.267  |
|  | Child (5-17 y)                                      | 4.5(2.3-6.7)              | 5.6(3.0-8.2)              | 0.879  | 2.4(1.8-3.1)                | 3.9(2.5-5.3)                 | 0.073  | 5.1(3.4-6.9)    | 2.8(2.2-3.4)    | 2.3(0.8-3.8)      | 0.010  |
|  | Young Adult (18-34 y)                               | 2.6(2.0-3.2)              | 2.5(0.9-4.0)              | 0.278  | 4.5(4.2-4.8)                | 6.1(4.6-7.5)                 | 0.713  | 2.6(2-3.2.0)    | 4.6(4.3-4.9)    | -2(-3.0-1.1)      | 0.001  |
|  | Adult (35-59 y)                                     | 4.7(4.1-5.3)              | 4.3(2.9-5.6)              | 0.001  | 13.9(13.5-14.4)             | 13.1(11.0-15.1)              | 0.092  | 4.6(4.0-5.2)    | 13.9(13.4-14.3) | -9.3(-10.2-8.4)   | <0.001 |
|  | Older Adult (>60 y)                                 | 7.3(6.0-8.5)              | 4.8(2.8-6.8)              | 0.014  | 22.5(20.9-24.1)             | 19.3(13.2-25.3)              | 0.072  | 6.7(5.6-7.7)    | 22.2(20.7-23.8) | -15.6(-17.4-13.7) | <0.001 |
|  | <b>Sudan</b>                                        |                           |                           |        |                             |                              |        |                 |                 |                   |        |
|  | Age at amputation                                   | 48.5(46.5-50.5)           | 45(41.8-48.2)             | <0.001 | 30.5(29.1-32)               | 25.9(23.1-28.6)              | <0.001 | 47.6(45.9-49.3) | 29.7(28.4-31.1) | 17.9(16.9-18.9)   | <0.001 |
|  | Age at registration                                 | 52.1(51.4-52.7)           | 48.7(47.4-50)             | <0.001 | 39.7(38.9-40.5)             | 34(32.2-35.9)                | <0.001 | 51.2(50.6-51.8) | 38.7(38.0-39.5) | 12.5(11.5-13.4)   | <0.001 |
|  | Delay all PwAs (y)                                  | 3.6(3.3-4.0)              | 3.7(3.1-4.3)              | 0.053  | 9.2(8.7-9.8)                | 8.2(7.1-9.3)                 | 0.525  | 3.6(3.3-3.9)    | 9.1(8.6-9.6)    | -5.4(-6.0-4.9)    | <0.001 |
|  | <b>Delay by PwA age group (age at registration)</b> |                           |                           |        |                             |                              |        |                 |                 |                   |        |
|  | Young child (<5 y)                                  | 1.0(0.5-1.5)              | 1.2(0.4-2.0)              | 0.699  | 0.8(0.2-1.5)                | 1.3(0.4-2.3)                 | 0.385  | 1.1(0.6-1.5)    | 1.0 (0.5-1.5)   | 0.1(-0.7-0.9)     | 0.545  |
|  | Child (5-17 y)                                      | 2.7(1.6-3.7)              | 1.1(0.6-1.7)              | 0.117  | 2.9(2.2-3.6)                | 4.6(3.5-5.7)                 | 0.004  | 2.1(1.4-2.8)    | 3.4(2.8-4)      | -1.4(-2.3-0.4)    | 0.005  |
|  | Young Adult (18-34 y)                               | 3.3(2.7-3.9)              | 4.3(3.2-5.4)              | 0.004  | 5.2(4.7-5.7)                | 6.9(5.6-8.2)                 | 0.013  | 3.6(3.0-4.1)    | 5.6(5.1-6)      | -2(-2.7-1.3)      | <0.001 |
|  | Adult (35-59 y)                                     | 3.1(2.7-3.5)              | 3.4(2.7-4.2)              | 0.064  | 11.3(10.5-12.2)             | 9.6(7.4-11.9)                | 0.047  | 3.2(2.8-3.6)    | 11.1(10.3-11.9) | -7.9(-8.7-7.1)    | <0.001 |
|  | Older Adult (>60 y)                                 | 4.4(3.7-5.2)              | 4.1(2.8-5.4)              | 0.653  | 16.6(14.1-19.1)             | 15.1(9.3-20.9)               | 0.656  | 4.4(3.7-5)      | 16.4(14.1-18.7) | -12(-13.8-10.3)   | <0.001 |

Values are mean with 95% Confidence Interval (Mean (95% CI)). MD = Mean Difference between non-traumatic and non-traumatic values.

† Mann-Whitney U test between male and female participants

†† Mann-Whitney U test between participants with non-traumatic and traumatic amputation

y = years

# 1 participant; ## 2 participants

1 **Table 2. Distribution by sex and age of persons presenting with traumatic and non-traumatic amputations**

| Country            | Age Group             | Non-Traumatic Amputation |                      | Traumatic Amputation  |                      | Ratio traumatic:1 non-traumatic amputation | P value† | Total                 |                      | Grand Total  |
|--------------------|-----------------------|--------------------------|----------------------|-----------------------|----------------------|--------------------------------------------|----------|-----------------------|----------------------|--------------|
|                    |                       | Male N(R% C%)            | Female N(R% C%)      | Male N(R% C%)         | Female N(R% C%)      |                                            |          | Male N(R% C%)         | Female N(R% C%)      |              |
| <b>Overall</b>     | <b>Total</b>          | <b>5481(72.5 ..)</b>     | <b>2075(27.5 ..)</b> | <b>18636(89.2 ..)</b> | <b>2254(10.8 ..)</b> | 2.76                                       | <0.001   | <b>24117(84.8 ..)</b> | <b>4329(15.2 ..)</b> | <b>28446</b> |
|                    | Young Child (<5 y)    | 19(57.6 0.3)             | 14(42.4 0.7)         | 99(58.9 0.5)          | 69(41.1 3.1)         | 5.09                                       | 0.885    | 118(58.7 0.5)         | 83(41.3 1.9)         | 201(0.7)     |
|                    | Child (5-17 y)        | 168(54.2 3.1)            | 142(45.8 6.8)        | 1748(77.8 9.4)        | 500(22.2 22.2)       | 7.25                                       | <0.001   | 1916(74.9 7.9)        | 642(25.1 14.8)       | 2558(9.0)    |
|                    | Young Adult (18-34 y) | 753(70.6 13.7)           | 314(29.4 15.1)       | 8373(91.3 44.9)       | 799(8.7 35.4)        | 8.60                                       | <0.001   | 9126(89.1 37.8)       | 1113(10.9 25.7)      | 10239(36)    |
|                    | Adult (35-59 y)       | 2433(72.0 44.4)          | 948(28.0 45.7)       | 7047(90.8 37.8)       | 711(9.2 31.5)        | 2.29                                       | <0.001   | 9480(85.1 39.3)       | 1659(14.9 38.3)      | 11139(39.2)  |
|                    | Older Adult (>60 y)   | 2108(76.2 38.5)          | 657(23.8 31.7)       | 1369(88.7 7.3)        | 175(11.3 7.8)        | 0.56                                       | <0.001   | 3477(80.7 14.4)       | 832(19.3 19.2)       | 4309(15.1)   |
| <b>Afghanistan</b> | <b>Total</b>          | <b>1344(67.8 ..)</b>     | <b>638(32.2 ..)</b>  | <b>9261(89.2 ..)</b>  | <b>1121(10.8 ..)</b> | 8.50                                       | <0.001   | <b>10605(85.8 ..)</b> | <b>1759(14.2 ..)</b> | <b>12364</b> |
|                    | Young Child (<5 y)    | 9(64.3 0.7)              | 5(35.7 0.8)          | 67(56.3 0.7)          | 52(43.7 4.6)         | 10.82                                      | 0.568    | 76(57.1 0.7)          | 57(42.9 3.2)         | 133(1.1)     |
|                    | Child (5-17 y)        | 88(55.7 6.5)             | 70(44.3 11.0)        | 1356(79.3 14.6)       | 354(20.7 31.6)       | 16.43                                      | <0.001   | 1444(77.3 13.6)       | 424(22.7 24.1)       | 1868(15.1)   |
|                    | Young Adult (18-34 y) | 226(65.9 16.8)           | 117(34.1 18.3)       | 5239(93.0 56.6)       | 395(7.0 35.2)        | 3.18                                       | <0.001   | 5465(91.4 51.5)       | 512(8.6 29.1)        | 5977(48.3)   |
|                    | Adult (35-59 y)       | 468(62.0 34.8)           | 287(38.0 45)         | 2139(89.0 23.1)       | 265(11.0 23.6)       | 0.72                                       | <0.001   | 2607(82.5 24.6)       | 552(17.5 31.4)       | 3159(25.5)   |
|                    | Older Adult (>60 y)   | 553(77.7 41.1)           | 159(22.3 24.9)       | 460(89.3 5)           | 55(10.7 4.9)         | 10.39                                      | <0.001   | 1013(82.6 9.6)        | 214(17.4 12.2)       | 1227(9.9)    |
| <b>Cambodia</b>    | <b>Total</b>          | <b>142(70.0 ..)</b>      | <b>61(30.0 ..)</b>   | <b>1861(88.2 ..)</b>  | <b>309(11.8 ..)</b>  | 7.60                                       | <0.001   | <b>2003(86.6 ..)</b>  | <b>309(13.4 ..)</b>  | <b>2312</b>  |
|                    | Young Child (<5 y)    | 2(100 1.4)               | ..                   | 4(66.7 0.2)           | 2(33.3 0.8)          | 12.41                                      | 0.346    | 6(75.0 0.3)           | 2(25.0 0.6)          | 8(0.3)       |
|                    | Child (5-17 y)        | 3(30.0 2.1)              | 7(70.0 11.5)         | 53(69.7 2.8)          | 23(30.3 9.3)         | 14.82                                      | 0.013    | 56(65.1 2.8)          | 30(34.9 9.7)         | 86(3.7)      |
|                    | Young Adult (18-34 y) | 36(70.6 25.4)            | 15(29.4 24.6)        | 551(87.0 29.6)        | 82(13.0 33.1)        | 3.66                                       | 0.001    | 587(85.8 29.3)        | 97(14.2 31.4)        | 684(29.6)    |
|                    | Adult (35-59 y)       | 58(73.4 40.8)            | 21(26.6 34.4)        | 1069(91.3 57.4)       | 102(8.7 41.1)        | 2.05                                       | <0.001   | 1127(90.2 56.3)       | 123(9.8 39.8)        | 1250(54.1)   |
|                    | Older Adult (>60 y)   | 43(70.5 30.3)            | 18(29.5 29.5)        | 184(82.5 9.9)         | 39(17.5 15.7)        | 6.33                                       | 0.038    | 227(79.9 11.3)        | 57(20.1 18.4)        | 284(12.3)    |
| <b>Iraq</b>        | <b>Total</b>          | <b>829(72.4 ..)</b>      | <b>316(27.6 ..)</b>  | <b>2127(90.7 ..)</b>  | <b>219(9.3 ..)</b>   | 13.24                                      | <0.001   | <b>2956(84.7 ..)</b>  | <b>535(15.3 ..)</b>  | <b>3491</b>  |
|                    | Young Child (<5 y)    | 1(33.3 0.1)              | 2(66.7 0.6)          | 12(63.2 0.6)          | 7(36.8 3.2)          | 2.22                                       | 0.329    | 13(59.1 0.4)          | 9(40.9 1.7)          | 22(0.6)      |
|                    | Child (5-17 y)        | 14(50.0 1.7)             | 14(50.0 4.4)         | 122(77.7 5.7)         | 35(22.3 16.0)        | 0.38                                       | 0.002    | 136(73.5 4.6)         | 49(26.5 9.2)         | 185(5.3)     |
|                    | Young Adult (18-34 y) | 43(68.3 5.2)             | 20(31.7 6.3)         | 756(90.6 35.5)        | 78(9.4 35.6)         | 3.32                                       | <0.001   | 799(89.1 27.0)        | 98(10.9 18.3)        | 897(25.7)    |
|                    | Adult (35-59 y)       | 376(74.0 45.4)           | 132(26.0 41.8)       | 1043(92.5 49.0)       | 84(7.5 38.4)         | 2.00                                       | <0.001   | 1419(86.8 48.0)       | 216(13.2 40.4)       | 1635(46.8)   |
|                    | Older Adult (>60 y)   | 395(72.7 47.6)           | 148(27.3 46.8)       | 194(92.8 9.1)         | 15(7.2 6.8)          | 4.34                                       | <0.001   | 589(78.3 19.9)        | 163(21.7 30.5)       | 752(21.5)    |
| <b>Myanmar</b>     | <b>Total</b>          | <b>908(74.5 ..)</b>      | <b>311(25.5 ..)</b>  | <b>3726(92.0 ..)</b>  | <b>322(8.0 ..)</b>   | 3.41                                       | <0.001   | <b>4634(88.0 ..)</b>  | <b>633(12.0 ..)</b>  | <b>5267</b>  |
|                    | Young Child (<5 y)    | 1(50.0 0.1)              | 1(50.0 0.3)          | 2(50.0 0.1)           | 2(50.0 0.6)          | 0.84                                       | 1.000    | 3(50.0 0.1)           | 3(50.0 0.5)          | 6(0.1)       |
|                    | Child (5-17 y)        | 12(41.4 1.3)             | 17(58.6 5.5)         | 93(73.8 2.5)          | 33(26.2 10.2)        | 0.67                                       | 0.001    | 105(67.7 2.3)         | 50(32.3 7.9)         | 155(2.9)     |
|                    | Young Adult (18-34 y) | 111(81.0 12.2)           | 26(19.0 8.4)         | 1249(92.0 33.5)       | 109(8.0 33.9)        | 1.67                                       | <0.001   | 1360(91.0 29.3)       | 135(9 21.3)          | 1495(28.4)   |
|                    | Adult (35-59 y)       | 484(74.0 53.3)           | 170(26.0 54.7)       | 2081(93.4 55.9)       | 147(6.6 45.7)        | 2.11                                       | <0.001   | 2565(89.0 55.4)       | 317(11.0 50.1)       | 2882(54.7)   |
|                    | Older Adult (>60 y)   | 300(75.6 33)             | 97(24.4 31.2)        | 301(90.7 8.1)         | 31(9.3 9.6)          | 1.51                                       | <0.001   | 601(82.4 13)          | 128(17.6 20.2)       | 729(13.8)    |
| <b>Sudan</b>       | <b>Total</b>          | <b>2258(75.1 ..)</b>     | <b>749(24.9 ..)</b>  | <b>1661(82.8 ..)</b>  | <b>344(17.2 ..)</b>  | 0.25                                       | <0.001   | <b>3919(78.2 ..)</b>  | <b>1093(21.8 ..)</b> | <b>5012</b>  |
|                    | Young Child (<5 y)    | 6(50.0 0.3)              | 6(50.0 0.8)          | 14(70.0 0.8)          | 6(30.0 1.7)          | 2.76                                       | 0.258    | 20(62.5 0.5)          | 12(37.5 1.1)         | 32(0.6)      |
|                    | Child (5-17 y)        | 51(60.0 2.3)             | 34(40.0 4.5)         | 124(69.3 7.5)         | 55(30.7 16)          | 5.09                                       | 0.136    | 175(66.3 4.5)         | 89(33.7 8.1)         | 264(5.3)     |
|                    | Young Adult (18-34 y) | 337(71.2 14.9)           | 136(28.8 18.2)       | 578(81.1 34.8)        | 135(18.9 39.2)       | 7.25                                       | <0.001   | 915(77.2 23.3)        | 271(22.8 24.8)       | 1186(23.7)   |
|                    | Adult (35-59 y)       | 1047(75.6 46.4)          | 338(24.4 45.1)       | 715(86.4 43)          | 113(13.6 32.8)       | 8.60                                       | <0.001   | 1762(79.6 45)         | 451(20.4 41.3)       | 2213(44.2)   |
|                    | Older Adult (>60 y)   | 817(77.7 36.2)           | 235(22.3 31.4)       | 230(86.8 13.8)        | 35(13.2 10.2)        | 2.29                                       | 0.001    | 1047(79.5 26.7)       | 270(20.5 24.7)       | 1317(26.3)   |

2 Values are number of participants (row % | column %). Row % relates to sex distribution. Column % relates to age distribution.

3 † Chi Square tests between participants by sex and cause (non-traumatic/ traumatic amputation).

4 y = years

## 1 **Distribution by sex and age of persons presenting with traumatic and non-traumatic** 2 **amputations**

3 Table 2 shows that children under 18 attending were represented in low proportions (3 -  
4 5.9%) in all countries except Afghanistan (2001 [16.2%] of 12364). Sudan had the highest  
5 proportion of PwA attending in ages over 60 (1317 [26.3%] of 5012).

6 Most men entering rehabilitation were of working age (18–59 years) ranging from 68.3%  
7 (Sudan) to 85.6% (Cambodia) of total males. Among women, the working age group (18–59  
8 years) constituted between 58.7% (Iraq) and 71.4% (Myanmar) of total females.

9 The proportion of males accessing rehabilitation was higher in all age groups except children  
10 under five in Myanmar (3 [50.0%] of 6). Even in older age groups (>60 years) there was a  
11 significant male versus female majority (3477 [80.7%] of 4309) across all countries, relating  
12 to traumatic and non-traumatic causes. The majority of users with non-traumatic  
13 amputation were aged under 60 years, 3373 (61.5%) of 5481 male and 1418 (68.3%) of 2075  
14 female PwA.

## 15 **Distribution of amputation causes by categories and in detail, by country**

16 Figure 1 illustrates how the registered causes of amputation were categorized. Most  
17 amputations were of traumatic origin, 20890 [73.4%] of 28466 (table 3).

18 Among all men, 18636 (77.3%) of 24117 had traumatic amputations. Among all women,  
19 2254 (52.1%) of 4329 had traumatic amputation.

20 Sudan had the highest proportion of non-traumatic amputations, 3007 (60.0%) of 5012,  
21 outnumbering traumatic amputations across both sexes and had an overall higher female  
22 representation of 1093 (21.8%) of 5012 compared to the remaining countries.

23 Despite the high numbers of conflict-related amputation in the overall cohort, 1885 (43.5%)  
24 of 4329 females and 5114 (21.2%) of 24117 males presented with a likely T2D related  
25 amputation.

26 One third (9319 [32.8%] of 28466) of the overall cohort attended with amputation caused by  
27 weapon-contamination. RTA constituted 3044 (10.7%) of all amputation causes. Blast injury  
28 caused 2319 (8.2%) and gunshot wound (GSW) 1834 (6.4%) of all amputations.

29 More than half of all men presented with conflict-related traumatic amputations, 12691  
30 (52.7%) of 24117, landmines alone constituted 8571 (35.3%) of all males' amputations.

31 Within women, traumatic amputations were evenly distributed between conflict and non-  
32 conflict related (1110 [25.7%] and 1144 [26.4%] of 4329, respectively). Landmines caused  
33 483 (11.2%), RTA 396 (9.1%) and domestic accidents 369 (8.5%) of all females' amputations.  
34 Proportions of men compared to women were significantly higher in most traumatic causes.

35 This was even more pronounced in conflict-related causes and highest for landmines, 8517  
36 (94.6%) of 9000. In Myanmar, weapon-contamination caused 2200 (41.8%) of 5267  
37 amputations, in Afghanistan 5147 (41.6%) of 12364, in Iraq 714 (20.5%) of 3491, in Sudan 57  
38 (1.1%) of 5012 and in post-conflict Cambodia 1201 (51.9%) of 2312.

Table 3. Distribution of amputation causes by categories and in detail, by country<sup>1</sup>

|                                 |                                      | All countries   |                  |                 | Afghanistan     |                 |                 | Cambodia        |                 |                 |
|---------------------------------|--------------------------------------|-----------------|------------------|-----------------|-----------------|-----------------|-----------------|-----------------|-----------------|-----------------|
|                                 |                                      | Total N         | Male N(R% C%)    | Female N(R% C%) | Total N(C%)     | Male N(R% C%)   | Female N(R% C%) | Total N(C%)     | Male N(R% C%)   | Female N(R% C%) |
| <b>Total</b>                    |                                      | 28446           | 24117(84.8 ..)   | 4329(15.2 ..)   | 12364(..)       | 10605(85.8 ..)  | 1759(14.2 ..)   | 2312(..)        | 2003(86.6 ..)   | 309(13.4 ..)    |
| Non-trauma                      |                                      | 7556            | 5481(72.5 22.7)  | 2075(27.5 47.9) | 1982(16.0)      | 1344(67.8 12.7) | 638(32.2 36.3)  | 203(8.8)        | 142(70.0 7.1)   | 61(30.0 19.7)   |
| Trauma                          |                                      | 20890           | 18636(89.2 77.3) | 2254(10.8 52.1) | 10382(84.0)     | 9261(89.2 87.3) | 1121(10.8 63.7) | 2109(91.2)      | 1861(88.2 92.9) | 248(11.8 80.3)  |
| <b>Causes by Sub-Categories</b> |                                      |                 |                  |                 |                 |                 |                 |                 |                 |                 |
| Non-trauma NCD/T2D              |                                      | 6999            | 5114(73.1 21.2)  | 1885(26.9 43.5) | 1750(14.2)      | 1190(68.0 11.2) | 560(32.0 31.8)  | 192(8.3)        | 134(69.8 6.7)   | 58(30.2 18.8)   |
| Non-trauma Other                |                                      | 557             | 367(65.9 1.5)    | 190(34.1 4.4)   | 232(1.9)        | 154(66.4 1.5)   | 78(33.6 4.4)    | 11(0.5)         | 8(72.7 0.4)     | 3(27.3 1)       |
| Trauma                          | Trauma Non-conflict Non-accident     | 1164            | 930(79.9 3.9)    | 234(20.1 5.4)   | 332(2.7)        | 255(76.8 2.4)   | 77(23.2 4.4)    | 320(13.8)       | 275(85.9 13.7)  | 45(14.1 14.6)   |
|                                 | Trauma Non-conflict Accident         | 5925            | 5015(84.6 20.8)  | 910(15.4 21)    | 2245(18.2)      | 1872(83.4 17.7) | 373(16.6 21.2)  | 501(21.7)       | 423(84.4 21.1)  | 78(15.6 25.2)   |
|                                 | Trauma Conflict Weapon               | 4482            | 3872(86.4 16.1)  | 610(13.6 14.1)  | 2658(21.5)      | 2261(85.1 21.3) | 397(14.9 22.6)  | 87(3.8)         | 62(71.3 3.1)    | 25(28.7 8.1)    |
|                                 | Trauma Conflict Weapon contamination | 9319            | 8819(94.6 36.6)  | 500(5.4 11.6)   | 5147(41.6)      | 4873(94.7 46.0) | 274(5.3 15.6)   | 1201(51.9)      | 1101(91.7 55)   | 100(8.3 32.4)   |
| <b>Causes in Detail</b>         |                                      |                 |                  |                 |                 |                 |                 |                 |                 |                 |
| Non-trauma                      | Infectious                           | 3661            | 2618(71.5 10.9)  | 1043(28.5 24.1) | 1205(9.7)       | 821(68.1 7.7)   | 384(31.9 21.8)  | 161(7)          | 117(72.7 5.8)   | 44(27.3 14.2)   |
|                                 | Metabolic                            | 148             | 115(77.7 0.5)    | 33(22.3 0.8)    | 137(1.1)        | 110(80.3 1.0)   | 27(19.7 1.5)    | ..              | ..              | ..              |
|                                 | Vascular                             | 3190            | 2381(74.6 9.9)   | 809(25.4 18.7)  | 408(3.3)        | 259(63.5 2.4)   | 149(36.5 8.5)   | 31(1.3)         | 17(54.8 0.8)    | 14(45.2 4.5)    |
|                                 | Cancerous                            | 511             | 344(67.3 1.4)    | 167(32.7 3.9)   | 204(1.6)        | 144(70.6 1.4)   | 60(29.4 3.4)    | 1(0.0)          | 1(100 0)        | ..              |
|                                 | Other – Non-Trauma                   | 46              | 23(50.0 0.1)     | 23(50.0 0.5)    | 28(0.2)         | 10(35.7 0.1)    | 18(64.3 1)      | 10(0.4)         | 7(70.0 0.3)     | 3(30.0 1.0)     |
| Trauma                          | Animal bite                          | 203             | 156(76.8 0.6)    | 47(23.2 1.1)    | 15(0.1)         | 14(93.3 0.1)    | 1(6.7 0.1)      | 16(0.7)         | 11(68.8 0.5)    | 5(31.3 1.6)     |
|                                 | Crime                                | 5               | 5(100 0)         | ..              | 3(0)            | 3(100 0)        | ..              | ..              | ..              | ..              |
|                                 | Frost bite                           | 48              | 46(95.8 0.2)     | 2(4.2 0)        | 37(0.3)         | 35(94.6 0.3)    | 2(5.4 0.1)      | ..              | ..              | ..              |
|                                 | Other – Trauma                       | 908             | 723(79.6 3.0)    | 185(20.4 4.3)   | 277(2.2)        | 203(73.3 1.9)   | 74(26.7 4.2)    | 304(13.1)       | 264(86.8 13.2)  | 40(13.2 12.9)   |
|                                 | Domestic accident                    | 1388            | 1019(73.4 4.2)   | 369(26.6 8.5)   | 825(6.7)        | 557(67.5 5.3)   | 268(32.5 15.2)  | 52(2.2)         | 45(86.5 2.2)    | 7(13.5 2.3)     |
|                                 | Occupational accident                | 1191            | 1096(92.0 4.5)   | 95(8.0 2.2)     | 379(3.1)        | 363(95.8 3.4)   | 16(4.2 0.9)     | 93(4)           | 79(84.9 3.9)    | 14(15.1 4.5)    |
|                                 | Railway accident                     | 227             | 183(80.6 0.8)    | 44(19.4 1.0)    | 10(0.1)         | 9(90.0 0.1)     | 1(10.0 0.1)     | 3(0.1)          | 2(66.7 0.1)     | 1(33.3 0.3)     |
|                                 | RTA                                  | 3044            | 2648(87.0 11.0)  | 396(13.0 9.1)   | 1024(8.3)       | 936(91.4 8.8)   | 88(8.6 5.0)     | 349(15.1)       | 294(84.2 14.7)  | 55(15.8 17.8)   |
|                                 | Sport accident                       | 75              | 69(92.0 0.3)     | 6(8.0 0.1)      | 7(0.1)          | 7(100 0.1)      | ..              | 4(0.2)          | 3(75.0 0.1)     | 1(25.0 0.3)     |
|                                 | Blast injury                         | 2319            | 1980(85.4 8.2)   | 339(14.6 7.8)   | 1383(11.2)      | 1131(81.8 10.7) | 252(18.2 14.3)  | 15(0.6)         | 11(73.3 0.5)    | 4(26.7 1.3)     |
|                                 | GSW                                  | 1834            | 1628(88.8 6.8)   | 206(11.2 4.8)   | 1157(9.4)       | 1037(89.6 9.8)  | 120(10.4 6.8)   | 28(1.2)         | 23(82.1 1.1)    | 5(17.9 1.6)     |
|                                 | Other – Conflict                     | 273             | 218(79.9 0.9)    | 55(20.1 1.3)    | 88(0.7)         | 68(77.3 0.6)    | 20(22.7 1.1)    | 25(1.1)         | 12(48.0 0.6)    | 13(52.0 4.2)    |
|                                 | No data*                             | 56              | 46(82.1 0.2)     | 10(17.9 0.2)    | 30(0.2)         | 25(83.3 0.2)    | 5(16.7 0.3)     | 19(0.8)         | 16(84.2 0.8)    | 3(15.8 1.0)     |
|                                 | Cluster Munitions                    | 71              | 69(97.2 0.3)     | 2(2.8 0)        | 38(0.3)         | 37(97.4 0.3)    | 1(2.6 0.1)      | 11(0.5)         | 11(100 0.5)     | ..              |
|                                 | ERW                                  | 248             | 233(94.0 1.0)    | 15(6.0 0.3)     | 208(1.7)        | 197(94.7 1.9)   | 11(5.3 0.6)     | 1(0)            | 1(100 0)        | ..              |
| Landmines                       | 9000                                 | 8517(94.6 35.3) | 483(5.4 11.2)    | 4901(39.6)      | 4639(94.7 43.7) | 262(5.3 14.9)   | 1189(51.4)      | 1089(91.6 54.4) | 100(8.4 32.4)   |                 |

<sup>1</sup>the reader is directed to fig. 1 when interpreting this table

|                                 |                                      | Iraq           |                |                 | Myanmar         |                 |                 | Sudan        |                 |                 |
|---------------------------------|--------------------------------------|----------------|----------------|-----------------|-----------------|-----------------|-----------------|--------------|-----------------|-----------------|
|                                 |                                      | Total N(C%)    | Male N(R% C%)  | Female N(R% C%) | Total N(C%)     | Male N(R% C%)   | Female N(R% C%) | Total N(C%)  | Male N(R% C%)   | Female N(R% C%) |
| <b>Total</b>                    |                                      | 3491(..)       | 2956(84.7 ..)  | 535(15.3 ..)    | 5267(..)        | 4634(88.0 ..)   | 633(12.0 ..)    | 5012(..)     | 3919(78.2 ..)   | 1093(21.8 ..)   |
|                                 | Non-trauma                           | 1145(32.8)     | 829(72.4 28)   | 316(27.6 59.1)  | 1219(23.1)      | 908(74.5 19.6)  | 311(25.5 49.1)  | 3007(60.0)   | 2258(75.1 57.6) | 749(24.9 68.5)  |
|                                 | Trauma                               | 2346(67.2)     | 2127(90.7 72)  | 219(9.3 40.9)   | 4048(76.9)      | 3726(92.0 80.4) | 322(8.0 50.9)   | 2005(40.0)   | 1661(82.8 42.4) | 344(17.2 31.5)  |
| <b>Causes by Sub-Categories</b> |                                      |                |                |                 |                 |                 |                 |              |                 |                 |
|                                 | Non-trauma NCD/T2D                   | 1084(31.1)     | 790(72.9 26.7) | 294(27.1 55.0)  | 1138(21.6)      | 846(74.3 18.3)  | 292(25.7 46.1)  | 2835(56.6)   | 2154(76.0 55.0) | 681(24.0 62.3)  |
|                                 | Non-trauma Other                     | 61(1.7)        | 39(63.9 1.3)   | 22(36.1 4.1)    | 81(1.5)         | 62(76.5 1.3)    | 19(23.5 3)      | 172(3.4)     | 104(60.5 2.7)   | 68(39.5 6.2)    |
| Trauma                          | Trauma Non-conflict Non-accident     | 32(0.9)        | 29(90.6 1)     | 3(9.4 0.6)      | 76(1.4)         | 60(78.9 1.3)    | 16(21.1 2.5)    | 404(8.1)     | 311(77.0 7.9)   | 93(23.0 8.5)    |
|                                 | Trauma Non-conflict Accident         | 525(15)        | 446(85 15.1)   | 79(15 14.8)     | 1689(32.1)      | 1469(87.0 31.7) | 220(13.0 34.8)  | 965(19.3)    | 805(83.4 20.5)  | 160(16.6 14.6)  |
|                                 | Trauma Conflict Weapon               | 1075(30.8)     | 978(91 33.1)   | 97(9.0 18.1)    | 83(1.6)         | 77(92.8 1.7)    | 6(7.2 0.9)      | 579(11.6)    | 494(85.3 12.6)  | 85(14.7 7.8)    |
|                                 | Trauma Conflict Weapon contamination | 714(20.5)      | 674(94.4 22.8) | 40(5.6 7.5)     | 2200(41.8)      | 2120(96.4 45.7) | 80(3.6 12.6)    | 57(1.1)      | 51(89.5 1.3)    | 6(10.5 0.5)     |
| <b>Causes in Detail</b>         |                                      |                |                |                 |                 |                 |                 |              |                 |                 |
| Non-trauma                      | Infectious                           | 367(10.5)      | 260(70.8 8.8)  | 107(29.2 20.0)  | 542(10.3)       | 387(71.4 8.4)   | 155(28.6 24.5)  | 1386(27.7)   | 1033(74.5 26.4) | 353(25.5 32.3)  |
|                                 | Metabolic                            | ..             | ..             | ..              | 11(0.2)         | 5(45.5 0.1)     | 6(54.5 0.9)     | ..           | ..              | ..              |
|                                 | Vascular                             | 717(20.5)      | 530(73.9 17.9) | 187(26.1 35.0)  | 585(11.1)       | 454(77.6 9.8)   | 131(22.4 20.7)  | 1449(28.9)   | 1121(77.4 28.6) | 328(22.6 30)    |
|                                 | Cancerous                            | 60(1.7)        | 38(63.3 1.3)   | 22(36.7 4.1)    | 74(1.4)         | 57(77.0 1.2)    | 17(23.0 2.7)    | 172(3.4)     | 104(60.5 2.7)   | 68(39.5 6.2)    |
|                                 | Other – Non-Trauma                   | 1(0)           | 1(100 0)       | ..              | 7(0.1)          | 5(71.4 0.1)     | 2(28.6 0.3)     | ..           | ..              | ..              |
| Trauma                          | Infectious                           | 4(0.1)         | 3(75 0.1)      | 1(25.0 0.2)     | 20(0.4)         | 13(65.0 0.3)    | 7(35.0 1.1)     | 148(3.0)     | 115(77.7 2.9)   | 33(22.3 3.0)    |
|                                 | Crime                                | 2(0.1)         | 2(100 0.1)     | ..              | ..              | ..              | ..              | ..           | ..              | ..              |
|                                 | Frost bite                           | 6(0.2)         | 6(100 0.2)     | ..              | 3(0.1)          | 3(100 0.1)      | ..              | 2(0)         | 2(100 0.1)      | ..              |
|                                 | Other – Trauma                       | 20(0.6)        | 18(90.0 0.6)   | 2(10.0 0.4)     | 53(1)           | 44(83.0 0.9)    | 9(17.0 1.4)     | 254(5.1)     | 194(76.4 5)     | 60(23.6 5.5)    |
|                                 | Domestic accident                    | 83(2.4)        | 66(79.5 2.2)   | 17(20.5 3.2)    | 297(5.6)        | 259(87.2 5.6)   | 38(12.8 6)      | 131(2.6)     | 92(70.2 2.3)    | 39(29.8 3.6)    |
|                                 | Occupational accident                | 102(2.9)       | 95(93.1 3.2)   | 7(6.9 1.3)      | 553(10.5)       | 499(90.2 10.8)  | 54(9.8 8.5)     | 63(1.3)      | 60(95.2 1.5)    | 3(4.8 0.3)      |
|                                 | Railway accident                     | 8(0.2)         | 6(75 0.2)      | 2(25.0 0.4)     | 164(3.1)        | 129(78.7 2.8)   | 35(21.3 5.5)    | 42(0.8)      | 37(88.1 0.9)    | 5(11.9 0.5)     |
|                                 | RTA                                  | 325(9.3)       | 272(83.7 9.2)  | 53(16.3 9.9)    | 637(12.1)       | 546(85.7 11.8)  | 91(14.3 14.4)   | 709(14.1)    | 600(84.6 15.3)  | 109(15.4 10)    |
|                                 | Sport accident                       | 7(0.2)         | 7(100 0.2)     | ..              | 38(0.7)         | 36(94.7 0.8)    | 2(5.3 0.3)      | 19(0.4)      | 16(84.2 0.4)    | 3(15.8 0.3)     |
|                                 | Blast injury                         | 844(24.2)      | 770(91.2 26)   | 74(8.8 13.8)    | 17(0.3)         | 15(88.2 0.3)    | 2(11.8 0.3)     | 60(1.2)      | 53(88.3 1.4)    | 7(11.7 0.6)     |
|                                 | GSW                                  | 144(4.1)       | 130(90.3 4.4)  | 14(9.7 2.6)     | 60(1.1)         | 56(93.3 1.2)    | 4(6.7 0.6)      | 445(8.9)     | 382(85.8 9.7)   | 63(14.2 5.8)    |
|                                 | Other – Conflict                     | 85(2.4)        | 76(89.4 2.6)   | 9(10.6 1.7)     | 4(0.1)          | 4(100 0.1)      | ..              | 71(1.4)      | 58(81.7 1.5)    | 13(18.3 1.2)    |
|                                 | No data*                             | 2(0.1)         | 2(100 0.1)     | ..              | 2(0)            | 2(100 0)        | ..              | 3(0.1)       | 1(33.3 0)       | 2(66.7 0.2)     |
|                                 | Cluster Munitions                    | 2(0.1)         | 2(100 0.1)     | ..              | 6(0.1)          | 6(100 0.1)      | ..              | 14(0.3)      | 13(92.9 0.3)    | 1(7.1 0.1)      |
|                                 | ERW                                  | 38(1.1)        | 34(89.5 1.2)   | 4(10.5 0.7)     | 1(0)            | 1(100 0)        | ..              | ..           | ..              | ..              |
| Landmine                        | 674(19.3)                            | 638(94.7 21.6) | 36(5.3 6.7)    | 2193(41.6)      | 2113(96.4 45.6) | 80(3.6 12.6)    | 43(0.9)         | 38(88.4 1.0) | 5(11.6 0.5)     |                 |

Categories of amputation causes as illustrated in figure 1 and detailed causes in totals, by sex and by country. Values are number of participants (row % | column%). Row% relates to sex distribution. Column% relates to amputation cause distribution. RTA = road traffic accident; GSW = Gunshot wound; ERW = explosive remnants of war; no data = missing variable (mandatory entry in database) due to software error in the category ‘Trauma Conflict Weapon’.

1 **Table 4. Amputation characteristics - combinations and levels of amputation**

| Combinations of amputation(s)                  | All Amputations    |                         |                        | Non-Traumatic Amputations |                        |                        | Traumatic Amputations |                         |                        |
|------------------------------------------------|--------------------|-------------------------|------------------------|---------------------------|------------------------|------------------------|-----------------------|-------------------------|------------------------|
|                                                | Total PwA (C%)     | Male N (R% C%)          | Female N (R% C%)       | Total (C%)                | Male N(R% C%)          | Female N(R% C%)        | Total (C%)            | Male N(R% C%)           | Female N(R% C%)        |
| <b>Total participants</b>                      | <b>28446</b>       | <b>24117 (84.8 ..)</b>  | <b>4329 (15.2 ..)</b>  | <b>7556(0)</b>            | <b>5481(72.5 0)</b>    | <b>2075(27.5 0)</b>    | <b>20890(0)</b>       | <b>18636(89.2 0)</b>    | <b>2254(10.8 0)</b>    |
| Persons with single LEA                        | 22693 (79.8)       | 19152 (84.4 79.4)       | 3541 (15.6 81.8)       | 7049(93.3)                | 5122(72.7 93.5)        | 1927(27.3 92.9)        | 15644(74.9)           | 14030(89.7 75.3)        | 1614(10.3 71.6)        |
| Persons with single UEA                        | 3402 (12.0)        | 2951 (86.7 12.2)        | 451 (13.3 10.4)        | 177(2.3)                  | 110(62.1 2.0)          | 67(37.9 3.2)           | 3225(15.4)            | 2841(88.1 15.2)         | 384(11.9 17.0)         |
| Persons with double LEA                        | 1868 (6.6)         | 1575 (84.3 6.5)         | 293 (15.7 6.8)         | 302(4.0)                  | 225(74.5 4.1)          | 77(25.5 3.7)           | 1566(7.5)             | 1350(86.2 7.2)          | 216(13.8 9.6)          |
| Persons with double UEA                        | 157 (0.6)          | 149 (94.9 0.6)          | 8 (5.1 0.2)            | 6(0.1)                    | 6(100 0.1)             | ..                     | 151(0.7)              | 143(94.7 0.8)           | 8(5.3 0.4)             |
| Persons with single LEA + single UEA           | 195 (0.7)          | 177 (90.8 0.7)          | 18 (9.2 0.4)           | 15(0.2)                   | 13(86.7 0.2)           | 2(13.3 0.1)            | 180(0.9)              | 164(91.1 0.9)           | 16(8.9 0.7)            |
| Persons with double LEA + single UEA           | 92 (0.3)           | 80 (87.0 0.3)           | 12 (13.0 0.3)          | 3(0)                      | 3(100 0.1)             | ..                     | 89(0.4)               | 77(86.5 0.4)            | 12(13.5 0.5)           |
| Persons with single LEA + double UEA           | 24 (0.1)           | 22 (91.7 0.1)           | 2 (8.3 0)              | 2(0)                      | 1(50 0)                | 1(50 0)                | 22(0.1)               | 21(95.5 0.1)            | 1(4.5 0)               |
| Persons with double LEA + double UEA           | 15 (0.1)           | 11 (73.3 0)             | 4 (26.7 0.1)           | 2(0)                      | 1(50 0)                | 1(50 0)                | 13(0.1)               | 10(76.9 0.1)            | 3(23.1 0.1)            |
| Levels of amputation(s)                        | Total Amp (C%)     | Amp in male PwA         | Amp in female PwA      | Total Amp                 | Amp in male PwA        | Amp in female PwA      | Total Amp             | Amp in male PwA         | Amp in female PwA      |
| <b>Total amputations</b>                       | <b>30943</b>       | <b>26255 (84.8 ..)</b>  | <b>4688 (15.2 ..)</b>  | <b>7835</b>               | <b>5694 (72.7 0)</b>   | <b>2141 (27.3 0)</b>   | <b>21795</b>          | <b>19384 (88.9 0)</b>   | <b>2411 (11.1 0)</b>   |
| <b>Total LEA</b>                               | <b>26862(86.8)</b> | <b>22683(84.4 86.4)</b> | <b>4179(15.6 89.1)</b> | <b>7680(98.0)</b>         | <b>5594(72.8 98.2)</b> | <b>2086(27.2 97.4)</b> | <b>19182(88.0)</b>    | <b>17089(89.1 88.2)</b> | <b>2093(10.9 86.8)</b> |
| Partial foot amputation                        | 1866(6.0)          | 1374(73.6 5.2)          | 492(26.4 10.5)         | 333(4.3)                  | 241(72.4 4.2)          | 92(27.6 4.3)           | 1533(7.0)             | 1133(73.9 5.8)          | 400(26.1 16.6)         |
| Ankle disarticulation                          | 432(1.4)           | 349(80.8 1.3)           | 83(19.2 1.8)           | 117(1.5)                  | 79(67.5 1.4)           | 38(32.5 1.8)           | 315(1.4)              | 270(85.7 1.4)           | 45(14.3 1.9)           |
| Transtibial amputation                         | 15399(49.8)        | 13017(84.5 49.6)        | 2382(15.5 50.8)        | 5008(63.9)                | 3665(73.2 64.4)        | 1343(26.8 62.7)        | 10391(47.7)           | 9352(90.0 48.2)         | 1039(10.0 43.1)        |
| Knee disarticulation/ Transcondylar amputation | 887(2.9)           | 759(85.6 2.9)           | 128(14.4 2.7)          | 164(2.1)                  | 128(78 2.2)            | 36(22 1.7)             | 723(3.3)              | 631(87.3 3.3)           | 92(12.7 3.8)           |
| Transfemoral amputation                        | 8080(26.1)         | 7019(86.9 26.7)         | 1061(13.1 22.6)        | 1983(25.3)                | 1430(72.1 25.1)        | 553(27.9 25.8)         | 6097(28)              | 5589(91.7 28.8)         | 508(8.3 21.1)          |
| Hip disarticulation/ Hemipelvectomy            | 198(0.6)           | 165(83.3 0.6)           | 33(16.7 0.7)           | 75(1.0)                   | 51(68 0.9)             | 24(32 1.1)             | 123(0.6)              | 114(92.7 0.6)           | 9(7.3 0.4)             |
| <b>Total UEA</b>                               | <b>4081(13.2)</b>  | <b>3572(87.5 13.6)</b>  | <b>509(12.5 10.9)</b>  | <b>155(2.0)</b>           | <b>100(64.5 1.8)</b>   | <b>55(35.5 2.6)</b>    | <b>2613(12.0)</b>     | <b>2295(87.8 11.8)</b>  | <b>318(12.2 13.2)</b>  |
| Partial hand amputation                        | 322(1.0)           | 258(80.1 1.0)           | 64(19.9 1.4)           | 21(0.3)                   | 12(57.1 0.2)           | 9(42.9 0.4)            | 124(0.6)              | 94(75.8 0.5)            | 30(24.2 1.2)           |
| Wrist disarticulation                          | 436(1.4)           | 393(90.1 1.5)           | 43(9.9 0.9)            | 11(0.1)                   | 8(72.7 0.1)            | 3(27.3 0.1)            | 417(1.9)              | 378(90.6 2.0)           | 39(9.4 1.6)            |
| Transradial amputation                         | 1973(6.4)          | 1762(89.3 6.7)          | 211(10.7 4.5)          | 37(0.5)                   | 23(62.2 0.4)           | 14(37.8 0.7)           | 820(3.8)              | 731(89.1 3.8)           | 89(10.9 3.7)           |
| Elbow disarticulation                          | 151(0.5)           | 131(86.8 0.5)           | 20(13.2 0.4)           | 9(0.1)                    | 6(66.7 0.1)            | 3(33.3 0.1)            | 139(0.6)              | 123(88.5 0.6)           | 16(11.5 0.7)           |
| Transhumeral amputation                        | 1078(3.5)          | 927(86 3.5)             | 151(14.0 3.2)          | 66(0.8)                   | 42(63.6 0.7)           | 24(36.4 1.1)           | 1004(4.6)             | 877(87.4 4.5)           | 127(12.6 5.3)          |
| Shoulder disarticulation                       | 121(0.4)           | 101(83.5 0.4)           | 20(16.5 0.4)           | 11(0.1)                   | 9(81.8 0.2)            | 2(18.2 0.1)            | 109(0.5)              | 92(84.4 0.5)            | 17(15.6 0.7)           |

2 Values are number of participants and number of amputations, respectively (row % | column %). Row% relates to sex distribution. Column% relates to amputation  
3 characteristic distribution. LEA = lower extremity amputation; UEA = upper extremity amputation

### 1 **Amputation characteristics - combinations and levels of amputation**

2 Table 4 illustrates amputation characteristics by combinations and levels. Multiple  
3 amputations were present in 2014 (8.4%) of 24117 men and 337 (7.8%) of 4329 women.  
4 Double LEA was the most common combination occurring in 1575 (6.5%) men and 293  
5 (6.8%) women and more likely in persons with traumatic amputations (1566 [7.5%] of  
6 20890) compared to those with non-traumatic amputations (302 [4.0%] of 7556).  
7 In total, 30943 amputations were registered, of which 15399 (49.8%) were transtibial. Of all  
8 non-traumatic amputations, 7680 (98.0% of 7835) were LEA, the majority transtibial (5008  
9 [63.9%]), whereas 2613 (12.0% of 19182) of all traumatic amputations occurred in the upper  
10 extremity.

### 11 **Living environment**

12 Most PwA reportedly came from rural environment (17202 [60.5%] of 28446; 1996 [7%]  
13 unspecified). There was a significantly higher proportion of women (1742 [18.8%] of 9248) in  
14 the urban compared to the rural population, (2308 [13.4%] of 17202;  $p < 0.01$ ).  
15  
16  
17

## 18 **DISCUSSION**

---

19 Traumatic amputation at young adult age has devastating effects on a person's private and  
20 professional perspectives. A worrying finding in this study was the delay between  
21 amputation and beginning rehabilitation, particularly for those with traumatic amputation.  
22 Ideally, prosthetic fitting happens right after wound-healing. Any delay will increase  
23 functional limitations and the potential of complications.<sup>42</sup> Consequently, duration, costs  
24 and complexity of rehabilitation will rise, including prosthetic adjustments. In cases of  
25 irreversible limitations PwA may no longer qualify for fitting.<sup>8</sup> The studied countries are  
26 marked either by protracted crisis with recurring flares of acute fighting or post-conflict with  
27 weak economy and fragile health systems.<sup>33</sup> These factors result in high numbers of PwA,  
28 who face access difficulties to rehabilitation aggravated by compromised infrastructure and  
29 security, lack of means or awareness, and critical scarcity or overload of existing  
30 rehabilitation workforce and services.<sup>4,43,44</sup>

31 The later age observed for non-traumatic amputation is not surprising, but the average age  
32 of 48.2 years is very low compared to studies in HIC reporting ages of over 65.<sup>1,45</sup>  
33 Amputations at young age as a complication of underlying health conditions such as T2D  
34 reflect the many health system challenges in the studied countries.<sup>46</sup> Although this group  
35 attends rehabilitation significantly faster than the traumatic group, the delay is still  
36 considerable and potentially harmful in view of the risks associated with immobility in poorly  
37 managed T2D. The difference in delay between the traumatic and non-traumatic cohorts  
38 may be explained by the widespread lack of essential healthcare services during past conflict  
39 (e.g. Cambodia).<sup>47</sup> This may have led to high mortality rates in persons with conditions like  
40 T2D. PwA of traumatic origin may have survived long enough to eventually attend  
41 rehabilitation, after years of unavailability or inaccessibility of services, a possible  
42 explanation for the considerable backlog of persons with traumatic amputations. A steadfast  
43 interpretation of detailed delays is impossible owing to the extremely complex conflict

1  
2  
3  
4  
5  
6  
7  
8  
9  
10  
11  
12  
13  
14  
15  
16  
17  
18  
19  
20  
21  
22  
23  
24  
25  
26  
27  
28  
29  
30  
31  
32  
33  
34  
35  
36  
37  
38  
39  
40  
41  
42  
43  
44  
45  
46  
47  
48  
49  
50  
51  
52  
53  
54  
55  
56  
57  
58  
59  
60

1 history and uncertain service provision in the studied contexts including displaced  
2 populations, persons of a specific ethnicity or with a political or military past unable to cross  
3 certain combat zones. What we know for sure is that an amputation at working age and  
4 delayed prosthetic fitting and rehabilitation – not counting the unknown numbers of non-  
5 attendees – feed into the vicious cycle of disability and poverty, increasing the difficulties  
6 PwA face when it comes to reintegrating into society in these contexts.<sup>44,48</sup>

7 The proportions of non-traumatic and traumatic amputations are reversed compared to  
8 non-conflict countries and disclose the human cost of protracted crises.<sup>45,49</sup> Explosive  
9 devices as amputation cause lead to complex injuries.<sup>4,25</sup> Patient outcomes depend on the  
10 availability and capacity of specialised emergency and surgical care if the effects of  
11 polytraumas are handled optimally. Subject to the extent of injury and the firearm used,  
12 amputations from GSW may also be an indicator of delayed trauma- and general poor  
13 health-care. In remote areas injured people may reach medical assistance only at a stage  
14 when the affected limb can no longer be saved. Furthermore, amputation being less time-  
15 consuming and risky than limb salvage may be indicated to assist higher numbers of  
16 people.<sup>50,51</sup> A person with traumatic amputation needs to cope with the sudden loss when  
17 adapting to a life with permanent disability. Rehabilitation outcomes depend on the  
18 complexity of polytraumas. The psychological consequences and post-traumatic  
19 repercussion are considerable after traumatic amputation and require specialised  
20 multidisciplinary care.<sup>25,48,52</sup>

21 The studied countries rank among the most mine-contaminated contexts worldwide.<sup>53</sup>  
22 Survivors with amputations from weapon-contamination symbolise the long-term  
23 consequences of conflict, which may last for decades and continue producing injuries and  
24 disability long after the end of active fighting. Cambodia's almost 30 years of conflict, for  
25 instance, ended in 1998. Between 2009 and 2018 more than half of all new registrations  
26 attending rehabilitation were male PwA caused by landmines exemplifying the sustained  
27 destructive potential of conflict on a society.

28 Many PRCs operate independently of other health structures and without medical personnel  
29 to confirm T2D diagnosis. Therefore, the numbers of amputation due to T2D may be  
30 underestimated, a conclusion also reported in amputation incidence studies.<sup>1</sup> Metabolic and  
31 vascular causes as noted by rehabilitation personnel without diagnostic tools and  
32 competencies were most probably linked to T2D, vascular complication of T2D or another  
33 vascular NCD.<sup>39</sup> Likewise, most infections causing non-traumatic amputations were assumed  
34 to result from undiagnosed or undocumented T2D with infected ulcer and gangrene.<sup>28,38</sup>  
35 Common etiologies of diabetes foot ulcer include neuropathic (approximately 55%), arterial  
36 (10%) and neuroischemic causes (approximately 35%).<sup>40</sup> PwA due to T2D in fragile settings  
37 are a highly vulnerable group. The amputation will be the consequence of a progressing  
38 chronic illness, which might be diagnosed only at the time of complication and which the  
39 person will have to cope with on top of the limb loss. If diagnosed, the person's  
40 understanding of their health status and its implications for lifestyle changes will be crucial.  
41 The risk of complications is considerable as the 39–68% five years mortality rate of diabetic  
42 foot shows.<sup>54</sup> In conflict countries, the comprehensive care required for conditions like T2D  
43 is challenged by lack of availability, affordability and access to inter-professional services for  
44 diagnosis and long-term management. It is also compromised by the environment as living in



1  
2  
3 1 displacement and depending on aid do not facilitate the necessary lifestyle adaptations, such  
4 2 as diet and exercise. Deprioritisation of NCD-care in crisis settings in order to address  
5 3 immediate trauma and prevent epidemics puts T2D patients at higher risk of neglect.<sup>28</sup>  
6 4 Regaining functionality through active rehabilitation may be more demanding compared to  
7 5 someone with traumatic amputation due to age and general health differences between  
8 6 both populations. The fitting process will be more complicated due to the remaining limb's  
9 7 shape and consistency. Complex chronic conditions require a kind of rehabilitation that PRCs  
10 8 in conflict zones may not be organized for.

11 9 The lack of T2D diagnostic data highlights the PRCs' unpreparedness for such scenarios,  
12 10 which will require changes of procedures, staffing ratio, occupancy rates and equipment and  
13 11 enhanced workforce skills regarding NCD/T2D management, diagnostics and data  
14 12 collections. International actors specialising in health and rehabilitation services and  
15 13 governments need to join forces and prioritise rehabilitation towards achieving sustainable  
16 14 development goal 3 which aims to "ensure healthy lives and promote well-being for all at all  
17 15 ages".<sup>55</sup> Improved NCD management on primary healthcare level is the first step.<sup>56</sup> Equally  
18 16 important will be adaptations of referral systems, interprofessional collaborations across the  
19 17 continuum of care and investments in systematic promotion of physical activity and  
20 18 preventive measures for persons at risk. To implement these recommendations, the health  
21 19 and rehabilitation expertise of international actors should get systematically informed by the  
22 20 contextualised know-how and commitment of local stakeholders including governmental  
23 21 and non-governmental institutions, health professionals and patients.

24 22 The peak of amputation among young adult males and the significant majority of male PwA  
25 23 may be explained by ongoing conflict in most contexts. There is consensus in the literature  
26 24 that worldwide more males than females undergo amputation, but the distribution differs  
27 25 according to age and cause.<sup>1,57,58</sup> Especially during active age and regardless of conflict, rates  
28 26 are higher in men due to work- or leisure-related accidents.<sup>49,59</sup> Despite a similar T2D  
29 27 prevalence among sexes, T2D-related amputation rates are higher among men due to higher  
30 28 prevalence of smoking, peripheral vascular disease, neuropathy and diabetic foot  
31 29 ulceration.<sup>1</sup> For certain groups a gender dimension may influence access to rehabilitation.  
32 30 Higher female than male proportions are reported for older persons with traumatic  
33 31 amputations which are unlikely due to combat or occupational risk.<sup>58,59</sup> This is in contrast to  
34 32 the significant male majority in our study population. Also, our findings revealed that in  
35 33 urban environments, and in contrast to men, female PwA attending rehabilitation constitute  
36 34 a significantly larger proportion than in rural environments. Access barriers to services for  
37 35 women from more remote rural areas may exist such as challenging infrastructure, poverty,  
38 36 insecurity, and cultural factors and warrant further investigation.<sup>60</sup>

39 37 The main limitation of this study is that data is derived from ICRC PRCs only and therefore  
40 38 not representative of population. However, in absence of amputation incidence data this  
41 39 first multi-country analysis offers a unique insight into the population of rehabilitation users  
42 40 with amputations in fragile contexts including (ex-)combatants and civilians of all ages with  
43 41 amputations of all origins. As the data does not represent prevalence, but attendance to  
44 42 rehabilitation, it is difficult to estimate how many PwA do not receive services. Where  
45 43 existing, data was compared to published prevalence studies from similar contexts. The  
46 44 dearth of quality publications in such contexts underlines the mismatch between existing  
47 45 research and where the burden of disease is.<sup>26</sup>

## CONCLUSION

---

In conclusion, this study highlights the persisting burden of amputation in conflict contexts and the consequences of broken health systems and a fragmented continuum of care. Young age and long delays to rehabilitation reveal the hardship in which PwAs live in such settings. The figures of landmine-caused amputations disclose the cruel long-term dimension of conflict.

Rehabilitation services are seriously under-resourced as revealed in a recent publication on global estimates of rehabilitation needs.<sup>61</sup> Our data have been collected in highly challenging and diverse settings where even basic healthcare is compromised. Providing rehabilitation and collecting data in these underserved, volatile contexts is exceptionally complex.<sup>30</sup> The few PRCs in conflict settings cater for amputations of various causes and PwA of different age, sex, other trauma and co-morbidities including psychological after-effects and future prospects of life with amputation. This requires tailored approaches matched with outcome and impact measurements. Managing these highly diverse processes is the responsibility of a multidisciplinary rehabilitation team including peer-support by other PwA – an enormous challenge in settings with so many needs and so little resources.

Preventive measures on all levels of healthcare are essential to reduce the number of T2D-caused amputations.<sup>62,63</sup> Rather than solely managing amputations as the last consequence, rehabilitation professionals should get increasingly involved in provision of comprehensive care.

We call out to rehabilitation service providers and healthcare professionals for a prioritisation of rehabilitation in fragile settings and a stronger and prompt involvement of rehabilitation professionals on all levels of the continuum of care. This includes international humanitarian interventions as well as local health system strengthening interventions. In addition, it is crucial that future research identifies and tests efficient, innovative, context-adapted best practice models including service provision and impact measurement to address the mismatch of rehabilitation needs and resources in fragile settings.

1  
2  
3 1 FUNDING  
4

---

5 2 This research received no specific grant from any funding agency in the public, commercial  
6 3 or not-for-profit sectors.

7 4 ICRC and Linköping University sponsored research group meetings for study design and data  
8 5 analysis at University College Dublin.  
9 6

10 7 COMPETING INTERESTS  
11

---

12 8 None declared  
13 9

14 10 ACKNOWLEDGEMENTS  
15

---

16 11 We would like to thank the ICRC personnel and PRC managers in the respective countries for  
17 12 advice and insights in data interpretation: Alberto Cairo and team from Afghanistan, Denver  
18 13 Graham, Phalla Keo and team from Cambodia, Therese Powell, Srood Suad Nafie and team  
19 14 from Iraq, Imad Aldibee and team from Sudan.  
20 15

21 16 CONTRIBUTORSHIP STATEMENT  
22

---

23 17 All six authors contributed to planning, conduct and reporting of the study.  
24 18

25 19 Specific additional contributions are as follows:  
26 20

27 21 Cornelia A. Barth: literature research, data acquisition and analysis, conception and design,  
28 22 data interpretation  
29 23

30 24 Andreas Wladis: conception and design, data interpretation  
31 25

32 26 Catherine Blake: conception and design, data analysis and interpretation  
33 27

34 28 Sigiriya Aebischer Perone: literature research, data interpretation  
35 29

36 30 Prashant Bhandarkar: data tabulation, analysis and interpretation  
37 31

38 32 Cliona O'Sullivan: literature research, conception and design, data interpretation  
39 33

40 34 DATA AVAILABILITY STATEMENT  
41

---

42 35 All relevant data are included in the tables of this study.  
43 36

44 37 Due to the sensitive nature of this data, data sharing is subject to regulations of ICRC data  
45 38 protection policy.  
46 39

1  
2  
3 1 REFERENCES  
4

- 
- 5 2 1 Narres M, Kvitkina T, Claessen H, *et al.* Incidence of lower extremity amputations in  
6 3 the diabetic compared with the non-diabetic population: A systematic review. *PLoS*  
7 4 *One* 2017; **12**: e0182081.
- 9 5 2 Global Lower Extremity Amputation Study Group. Epidemiology of lower extremity  
10 6 amputation in centres in Europe, North America, and East Asia. *Br J Surg* 2000; **87**:  
11 7 328–37.
- 13 8 3 Wachtel MS. Family poverty accounts for differences in lower-extremity amputation  
14 9 rates of minorities 50 years old or more with diabetes. *J Natl Med Assoc* 2005; **97**:  
15 10 334–8.
- 16 11 4 Mathieu L, Marty A, Ramaki A, *et al.* Current issues with lower extremity amputations  
17 12 in a country at war: Experience from the national military hospital of Kabul. *Eur J*  
18 13 *Trauma Emerg Surg* 2014; **40**: 387–93.
- 20 14 5 World Health Assembly. World Health Assembly Resolution 71.8. Improving Access to  
21 15 Assistive Technology. 2018.
- 22 16 6 von Kaeppler EP, Hetherington A, Donnelley CA, *et al.* Impact of prostheses on quality  
23 17 of life and functional status of transfemoral amputees in Tanzania. *African J Disabil*  
24 18 2021; **10**. DOI:10.4102/ajod.v10i0.839.
- 26 19 7 MacLachlan M, Banes D, Bell D, *et al.* Assistive technology policy: a position paper  
27 20 from the first global research, innovation, and education on assistive technology  
28 21 (GREAT) summit. *Disabil Rehabil Assist Technol* 2018; **13**: 454–66.
- 30 22 8 International Committee of the Red Cross. Prosthetic Gait Analysis for  
31 23 Physiotherapists. Geneva: International Committee of the Red Cross, 2014.
- 32 24 9 World Health Assembly. World Health Assembly Resolution 74. 8. The highest  
33 25 attainable standard of health for persons with disabilities. 2021.
- 34 26 10 Mcpherson A, Durham J, Richards N, Gouda H, Rampatige R, Whittaker M.  
35 27 Strengthening health information systems for disability-related rehabilitation in  
36 28 LMICs. *Health Policy Plan* 2017; **32**: 384–94.
- 38 29 11 Nugraha B, Setyono GR, Defi IR, Gutenbrunner C. Strengthening rehabilitation services  
39 30 in Indonesia: A brief situation analysis. *J Rehabil Med* 2018; **50**: 377–83.
- 41 31 12 Borg J, Lindström A, Larsson S. Assistive technology in developing countries: A review  
42 32 from the perspective of the Convention on the Rights of Persons with Disabilities.  
43 33 *Prosthet Orthot Int* 2011; **35**: 20–9.
- 44 34 13 Skempes D, Stucki G, Bickenbach J. Health-Related Rehabilitation and Human Rights:  
45 35 Analyzing States' Obligations Under the United Nations Convention on the Rights of  
46 36 Persons with Disabilities. *Arch Phys Med Rehabil* 2015; **96**: 163–73.
- 48 37 14 Skempes D, Bickenbach J. Strengthening rehabilitation for people with disabilities: A  
49 38 human rights approach as the essential next step to accelerating global progress. *Am J*  
50 39 *Phys Med Rehabil* 2015; **94**: 823–8.
- 51 40 15 Toro-Hernández ML, Kankipati P, Goldberg M, Contepomi S, Tsukimoto DR, Bray N.  
52 41 Appropriate Assistive Technology for Developing Countries. *Phys Med Rehabil Clin N*  
53 42 *Am* 2019; **30**: 847–65.
- 55 43 16 World Health Organization. Emergency medical teams: Minimum technical standards  
56 44 and recommendations for rehabilitation. Geneva: World Health Organization, 2016  
57 45 <https://apps.who.int/iris/handle/10665/252809> (accessed July 10, 2019).
- 59 46 17 Lathia C, Skelton P, Clift Z (editors). Early Rehabilitation in Conflicts and Disasters.  
60 47 2020 [https://hi.org/sn\\_uploads/document/36199-Humanity--Inclusion-Clinical-](https://hi.org/sn_uploads/document/36199-Humanity--Inclusion-Clinical-)

- 1 Handbook-web\_1.pdf (accessed June 23, 2021).
- 2
- 3 1
- 4 2 18 World Health Organization. Access to Rehabilitation in Primary Health Care: an
- 5 3 ongoing challenge. *Tech Ser Prim Heal Care* 2018; : 1–27.
- 6 4 19 World Health Organization. WHO standards for prosthetics and orthotics. Geneva,
- 7 5 2017
- 8 6 [http://apps.who.int/bookorders.%0Ahttp://apps.who.int/iris/bitstream/10665/25920](http://apps.who.int/bookorders.%0Ahttp://apps.who.int/iris/bitstream/10665/259209/1/9789241512480-part1-eng.pdf?ua=1)
- 9 7 9/1/9789241512480-part1-eng.pdf?ua=1.
- 10 8 20 World Health Organization. Rehabilitation 2030: A call for action. The need to scale up
- 11 9 rehabilitation. 2017.
- 12 10 21 Humanity & Inclusion; Global Rehabilitation Alliance. Rehabilitation for the realisation
- 13 11 of human rights and inclusive development. 2019.
- 14 12 22 Krueger CA, Wenke JC, Ficke JR. Ten years at war: Comprehensive analysis of
- 15 13 amputation trends. *J Trauma Acute Care Surg* 2012; **73**: S438–44.
- 16 14 23 Christensen J, Ipsen T, Doherty P, Langberg H. Physical and social factors determining
- 17 15 quality of life for veterans with lower-limb amputation(s): a systematic review. *Disabil*
- 18 16 *Rehabil* 2016; **38**: 2345–53.
- 19 17 24 Dougherty PJ, McFarland L V., Smith DG, Reiber GE. Combat-incurred bilateral
- 20 18 transfemoral limb loss: A comparison of the Vietnam War to the wars in Afghanistan
- 21 19 and Iraq. *J Trauma Acute Care Surg* 2012; **73**: 1590–5.
- 22 20 25 Ebrahimzadeh MH, Moradi A, Khorasani MR, *et al*. Long-term clinical outcomes of
- 23 21 war-related bilateral lower extremities amputations. *Inj Int J Care Inj* 2015; **46**: 275–
- 24 22 81.
- 25 23 26 Jain RP, Meteke S, Gaffey MF, *et al*. Delivering trauma and rehabilitation interventions
- 26 24 to women and children in conflict settings: A systematic review. *BMJ Glob Heal* 2020;
- 27 25 **5**: 1980.
- 28 26 27 James SL, Abate D, Abate KH, *et al*. Global, regional, and national incidence,
- 29 27 prevalence, and years lived with disability for 354 diseases and injuries for 195
- 30 28 countries and territories, 1990–2017: a systematic analysis for the Global Burden of
- 31 29 Disease Study 2017. *Lancet* 2018; **392**: 1789–858.
- 32 30 28 Aziz ARA, Alsabek MB. Diabetic foot and disaster; risk factors for amputation during
- 33 31 the Syrian crisis. *J Diabetes Complications* 2020; **34**: 107493.
- 34 32 29 World Health Organization. Global Status Report on Road Safety 2018. Geneva: World
- 35 33 Health Organisation, 2018.
- 36 34 30 Barth CA, Wladis A, Blake C, Bhandarkar P, O’Sullivan C. Users of rehabilitation
- 37 35 services in 14 countries and territories affected by conflict, 1988–2018. *Bull World*
- 38 36 *Health Organ* 2020; **98**: 599–614.
- 39 37 31 International Committee of the Red Cross. Physical Rehabilitation Programme. Annual
- 40 38 Report 2019. Geneva, 2020.
- 41 39 32 International Committee of the Red Cross. The ICRC’s mission statement. 2008.
- 42 40 <https://www.icrc.org/en/doc/resources/documents/misc/icrc-mission-190608.htm>.
- 43 41 33 International Committee of the Red Cross. Protracted conflict and humanitarian
- 44 42 action: some recent ICRC experiences. Geneva, 2016
- 45 43 [https://www.icrc.org/sites/default/files/document/file\\_list/protracted\\_conflict\\_and\\_](https://www.icrc.org/sites/default/files/document/file_list/protracted_conflict_and_humanitarian_action_icrc_report_lr_29.08.16.pdf)
- 46 44 [humanitarian\\_action\\_icrc\\_report\\_lr\\_29.08.16.pdf](https://www.icrc.org/sites/default/files/document/file_list/protracted_conflict_and_humanitarian_action_icrc_report_lr_29.08.16.pdf) (accessed July 10, 2019).
- 47 45 34 The World Bank. World Bank Country and Lending Groups. World Bank. 2021.
- 48 46 [https://datahelpdesk.worldbank.org/knowledgebase/articles/906519-world-bank-](https://datahelpdesk.worldbank.org/knowledgebase/articles/906519-world-bank-country-and-lending-groups)
- 49 47 [country-and-lending-groups](https://datahelpdesk.worldbank.org/knowledgebase/articles/906519-world-bank-country-and-lending-groups) (accessed June 18, 2021).
- 50
- 51
- 52
- 53
- 54
- 55
- 56
- 57
- 58
- 59
- 60

1  
2  
3  
4  
5  
6  
7  
8  
9  
10  
11  
12  
13  
14  
15  
16  
17  
18  
19  
20  
21  
22  
23  
24  
25  
26  
27  
28  
29  
30  
31  
32  
33  
34  
35  
36  
37  
38  
39  
40  
41  
42  
43  
44  
45  
46  
47  
48  
49  
50  
51  
52  
53  
54  
55  
56  
57  
58  
59  
60

- 1 35 United Nations Development Programme. Human Development Reports.  
2 <http://hdr.undp.org/en/countries> (accessed June 21, 2021).
- 3 36 World Health Organization. Countries. <https://www.who.int/data/gho/data/countries>  
4 (accessed June 21, 2021).
- 5 37 International Committee of the Red Cross. What is the ICRC doing to reduce the  
6 effects of weapon contamination? 2017  
7 <https://www.icrc.org/en/document/overview-mine-action> (accessed June 21, 2020).
- 8 38 Apelqvist J, Larsson J. What is the most effective way to reduce incidence of  
9 amputation in the diabetic foot? *Diabetes Metab Res Rev* 2000; **16 Suppl 1**: S75-83.
- 10 39 Ndip A, Jude EB. Emerging evidence for neuroischemic diabetic foot ulcers: Model of  
11 care and how to adapt practice. *Int J Low Extrem Wounds* 2009; **8**: 82–4.
- 12 40 Wang A, Lv G, Cheng X, *et al*. Guidelines on multidisciplinary approaches for the  
13 prevention and management of diabetic foot disease (2020 edition). *Burn Trauma*  
14 2020; **8**: 17.
- 15 41 Stevens GA, Alkema L, Black RE, *et al*. Guidelines for Accurate and Transparent Health  
16 Estimates Reporting: the GATHER statement. *Lancet* 2016; **388**: e19–23.
- 17 42 Webster JB. Lower Limb Amputation Care Across the Active Duty Military and Veteran  
18 Populations. *Phys Med Rehabil Clin N Am* 2019; **30**: 89–109.
- 19 43 Shaw J, Challa S, Conway D, *et al*. Quality of life and complications in lower limb  
20 amputees in Tanzania: results from a pilot study. *Lancet Glob Heal* 2018; **6**: S18.
- 21 44 Andregård E, Magnusson L. Experiences of attitudes in Sierra Leone from the  
22 perspective of people with poliomyelitis and amputations using orthotics and  
23 prosthetics. *Disabil Rehabil* 2017; **39**: 2619–25.
- 24 45 Godlwana L, Nadasan T, Puckree T. Global Trends in Incidence of Lower Limb  
25 Amputation : A review of the literature. *SA J Physiother* 2008; **64**: 1–5.
- 26 46 Carinci F, Massi Benedetti M, Klazinga NS, Uccioli L. Lower extremity amputation rates  
27 in people with diabetes as an indicator of health systems performance. A critical  
28 appraisal of the data collection 2000–2011 by the Organization for Economic  
29 Cooperation and Development (OECD). *Acta Diabetol* 2016; **53**: 825–32.
- 30 47 Santini H. Rebirth of the health-care system in Cambodia. *Lancet* 2002; **360**: s57-8.
- 31 48 Ferguson AD, Richie BS, Gomez MJ. Psychological factors after traumatic amputation  
32 in landmine survivors: The bridge between physical healing and full recovery. *Disabil*  
33 *Rehabil* 2004; **26**: 931–8.
- 34 49 Heikkinen M, Saarinen J, Suominen VP, Virkkunen J, Salenius J. Lower limb  
35 amputations: Differences between the genders and long-term survival. *Prosthet*  
36 *Orthot Int* 2007; **31**: 277–86.
- 37 50 Giannou C, Baldan M, Molde A. War Surgery: Working With Limited Resources in  
38 Armed Conflict and Other Situations of Violence (Volume 2). Geneva, 2013.
- 39 51 Muhrbeck M, Holmgren K, Osman Z, von Schreeb J, Wladis A, Andersson P. Trends in  
40 Demographics and Surgical Treatment of Weapon-Related Limb Injuries Over Two  
41 Decades in a Resource-Scarce Setting. *World J Surg* 2019; **43**: 2681–8.
- 42 52 Muzaffar N, Mansoor I, Hafeez A, Margoob M. Psychiatric comorbidity in amputees  
43 with average sociodemographic status and the role of theologic and family support in  
44 a conflict zone. *Australas J Disaster Trauma Stud* 2012; **2012**: 31–8.
- 45 53 International Campaign to Ban Landmines – Cluster Munition Coalition (ICBL-CMC).  
46 Landmine Monitor 2020. 2020 [http://www.the-monitor.org/en-  
47 gb/reports/2020/landmine-monitor-2020.aspx](http://www.the-monitor.org/en-gb/reports/2020/landmine-monitor-2020.aspx).

- 1  
2  
3 1 54 Dietrich I, Braga GA, de Melo FG, da Costa Silva ACC. The Diabetic Foot as a Proxy  
4 2 for Cardiovascular Events and Mortality Review. *Curr Atheroscler Rep* 2017; **19**: 44.  
5 3 55 United Nations. Goal 3 | Department of Economic and Social Affairs | Sustainable  
6 4 Developmet | Targets and Indicators. 2015. <https://sdgs.un.org/goals/goal3> (accessed  
7 5 June 14, 2021).  
8 6 56 Tesema AG, Ajisegiri WS, Abimbola S, *et al*. How well are non-communicable disease  
9 7 services being integrated into primary health care in Africa: A review of progress  
10 8 against World Health Organization’s African regional targets. *PLoS One* 2020; **15**.  
11 9 DOI:10.1371/journal.pone.0240984.  
12 10 57 Ephraim PL, Dillingham TR, Sector M, Pezzin LE, MacKenzie EJ. Epidemiology of limb  
13 11 loss and congenital limb deficiency: A review of the literature. *Arch Phys Med Rehabil*  
14 12 2003; **84**: 747–61.  
15 13 58 Varma P, Stineman MG, Dillingham TR. Epidemiology of Limb Loss. *Phys Med Rehabil*  
16 14 *Clin N Am* 2014; **25**: 1–8.  
17 15 59 Dillingham TR, Pezzin LE, Mackenzie EJ. Incidence, acute care length of stay, and  
18 16 discharge to rehabilitation of traumatic amputee patients: An epidemiologic study.  
19 17 *Arch Phys Med Rehabil* 1998; **79**: 279–87.  
20 18 60 Sen G, Östlin P. Gender inequity in health: why it exists and how we can change it.  
21 19 *Glob Public Health* 2008; **3**: 1–12.  
22 20 61 Cieza A, Causey K, Kamenov K, Hanson SW, Chatterji S, Vos T. Global estimates of the  
23 21 need for rehabilitation based on the Global Burden of Disease study 2019: a  
24 22 systematic analysis for the Global Burden of Disease Study 2019. *Lancet* 2020; **396**:  
25 23 2006–17.  
26 24 62 Hap K, Biernat K, Konieczny G. Patients with Diabetes Complicated by Peripheral  
27 25 Artery Disease: The Current State of Knowledge on Physiotherapy Interventions. *J.*  
28 26 *Diabetes Res.* 2021; **2021**. DOI:10.1155/2021/5122494.  
29 27 63 Freire APCF, Palma MR, Lacombe JCA, Martins RML, Lima RA de O, Pacagnelli FL.  
30 28 Implementation of physiotherapeutic shares in the prevention of diabetes  
31 29 complications in a Family Health Strategy. *Fisioter em Mov* 2015; **28**: 69–76.  
32  
33  
34  
35  
36  
37  
38  
39  
40  
41  
42  
43  
44  
45  
46  
47  
48  
49  
50  
51  
52  
53  
54  
55  
56  
57  
58  
59  
60

1  
2  
3 1 Legends for figures  
4

5 2 **Figure 1. Classification of amputation causes with % of total persons with amputations**  
6

7 3 All 21 variables on the right are as they appear in mandatory dropdown lists of the database. The database  
8 4 distinguishes between (i) traumatic and all other causes; (ii) conflict-related and all other traumatic causes; (iii)  
9 5 weapon-contamination and all other conflict-related causes; all additional categories were created based on the  
10 6 original 21 variables. NCD/T2D = cause likely linked to non-communicable disease (NCD) or type 2 diabetes  
11 7 mellitus (T2D) complications; RTA= road traffic accident; GSW= Gunshot wound; No data = software error;  
12 8 ERW= explosive remnants of war  
13  
14 9

15 10 **Figure 2. Age patterns of male and female persons with traumatic and non-traumatic amputation**  
16

17 11 Violin plots showing age of all male and female PwA of a) traumatic cause at time of amputation, b) at time of  
18 12 registration, age of male and female PwA of c) non-traumatic cause at time of amputation, d) at time of  
19 13 registration  
20  
21 14  
22  
23 15  
24  
25  
26  
27  
28  
29  
30  
31  
32  
33  
34  
35  
36  
37  
38  
39  
40  
41  
42  
43  
44  
45  
46  
47  
48  
49  
50  
51  
52  
53  
54  
55  
56  
57  
58  
59  
60



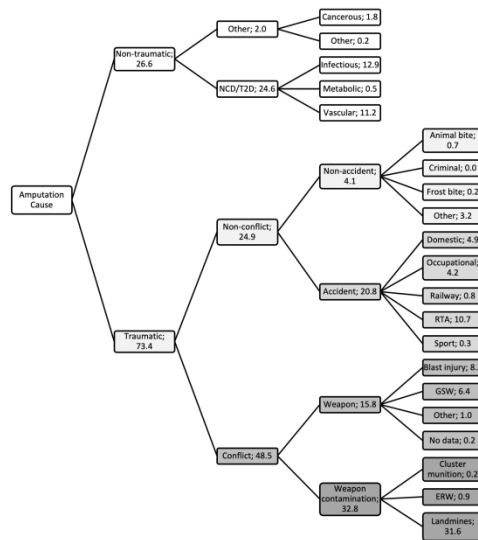

Figure 1. Classification of amputation causes with % of total persons with amputations  
 All 21 variables on the right are as they appear in mandatory dropdown lists of the database. The database distinguishes between (i) traumatic and all other causes; (ii) conflict-related and all other traumatic causes; (iii) weapon-contamination and all other conflict-related causes; all additional categories were created based on the original 21 variables. NCD/T2D = cause likely linked to non-communicable disease (NCD) or type 2 diabetes mellitus (T2D) complications; RTA= road traffic accident; GSW= Gunshot wound; No data = software error; ERW= explosive remnants of war

266x143mm (330 x 330 DPI)



Figure 2. Age patterns of male and female persons with traumatic and non-traumatic amputation  
Violin plots showing age of all male and female PwA of a) traumatic cause at time of amputation, b) at time  
of registration, age of male and female PwA of c) non-traumatic cause at time of amputation, d) at time of  
registration.

242x155mm (72 x 72 DPI)

**The RECORD statement – checklist of items, extended from the STROBE statement, that should be reported in observational studies using routinely collected health data.**

|                           | Item No. | STROBE items                                                                                                                                                                               | Location in manuscript where items are reported | RECORD items                                                                                                                                                                                                                                                                                                                                                                                                                                | Location in manuscript where items are reported |
|---------------------------|----------|--------------------------------------------------------------------------------------------------------------------------------------------------------------------------------------------|-------------------------------------------------|---------------------------------------------------------------------------------------------------------------------------------------------------------------------------------------------------------------------------------------------------------------------------------------------------------------------------------------------------------------------------------------------------------------------------------------------|-------------------------------------------------|
| <b>Title and abstract</b> |          |                                                                                                                                                                                            |                                                 |                                                                                                                                                                                                                                                                                                                                                                                                                                             |                                                 |
|                           | 1        | (a) Indicate the study's design with a commonly used term in the title or the abstract (b) Provide in the abstract an informative and balanced summary of what was done and what was found |                                                 | RECORD 1.1: The type of data used should be specified in the title or abstract. When possible, the name of the databases used should be included.<br><br>RECORD 1.2: If applicable, the geographic region and timeframe within which the study took place should be reported in the title or abstract.<br><br>RECORD 1.3: If linkage between databases was conducted for the study, this should be clearly stated in the title or abstract. | Page 2<br><br>Page 2<br><br>-                   |
| <b>Introduction</b>       |          |                                                                                                                                                                                            |                                                 |                                                                                                                                                                                                                                                                                                                                                                                                                                             |                                                 |
| Background rationale      | 2        | Explain the scientific background and rationale for the investigation being reported                                                                                                       |                                                 |                                                                                                                                                                                                                                                                                                                                                                                                                                             | Page 4-5                                        |
| Objectives                | 3        | State specific objectives, including any prespecified hypotheses                                                                                                                           |                                                 |                                                                                                                                                                                                                                                                                                                                                                                                                                             | Page 5                                          |
| <b>Methods</b>            |          |                                                                                                                                                                                            |                                                 |                                                                                                                                                                                                                                                                                                                                                                                                                                             |                                                 |
| Study Design              | 4        | Present key elements of study design early in the paper                                                                                                                                    |                                                 |                                                                                                                                                                                                                                                                                                                                                                                                                                             | Page 5                                          |
| Setting                   | 5        | Describe the setting, locations, and relevant dates, including periods of recruitment, exposure, follow-up, and data collection                                                            |                                                 |                                                                                                                                                                                                                                                                                                                                                                                                                                             | Page 5                                          |

|                                                                                                                                                                                                            |          |                                                                                                                                                                                                                                                                                                                                                                                                                                                                                                                                                                                                                                                                                                                        |  |                                                                                                                                                                                                                                                                                                                                                                                                                                                                                                                                                                                                                                                                                                      |                                 |
|------------------------------------------------------------------------------------------------------------------------------------------------------------------------------------------------------------|----------|------------------------------------------------------------------------------------------------------------------------------------------------------------------------------------------------------------------------------------------------------------------------------------------------------------------------------------------------------------------------------------------------------------------------------------------------------------------------------------------------------------------------------------------------------------------------------------------------------------------------------------------------------------------------------------------------------------------------|--|------------------------------------------------------------------------------------------------------------------------------------------------------------------------------------------------------------------------------------------------------------------------------------------------------------------------------------------------------------------------------------------------------------------------------------------------------------------------------------------------------------------------------------------------------------------------------------------------------------------------------------------------------------------------------------------------------|---------------------------------|
| <p>1<br/>2<br/>3<br/>4<br/>5<br/>6<br/>7<br/>8<br/>9<br/>10<br/>11<br/>12<br/>13<br/>14<br/>15<br/>16<br/>17<br/>18<br/>19<br/>20<br/>21<br/>22<br/>23<br/>24<br/>25<br/>26<br/>27</p> <p>Participants</p> | <p>6</p> | <p>(a) <i>Cohort study</i> - Give the eligibility criteria, and the sources and methods of selection of participants. Describe methods of follow-up<br/> <i>Case-control study</i> - Give the eligibility criteria, and the sources and methods of case ascertainment and control selection. Give the rationale for the choice of cases and controls<br/> <i>Cross-sectional study</i> - Give the eligibility criteria, and the sources and methods of selection of participants</p> <p>(b) <i>Cohort study</i> - For matched studies, give matching criteria and number of exposed and unexposed<br/> <i>Case-control study</i> - For matched studies, give matching criteria and the number of controls per case</p> |  | <p>RECORD 6.1: The methods of study population selection (such as codes or algorithms used to identify subjects) should be listed in detail. If this is not possible, an explanation should be provided.</p> <p>RECORD 6.2: Any validation studies of the codes or algorithms used to select the population should be referenced. If validation was conducted for this study and not published elsewhere, detailed methods and results should be provided.</p> <p>RECORD 6.3: If the study involved linkage of databases, consider use of a flow diagram or other graphical display to demonstrate the data linkage process, including the number of individuals with linked data at each stage.</p> | <p>Page 5</p> <p>-</p> <p>-</p> |
| <p>28<br/>29<br/>30<br/>31<br/>32<br/>33<br/>34</p> <p>Variables</p>                                                                                                                                       | <p>7</p> | <p>Clearly define all outcomes, exposures, predictors, potential confounders, and effect modifiers. Give diagnostic criteria, if applicable.</p>                                                                                                                                                                                                                                                                                                                                                                                                                                                                                                                                                                       |  | <p>RECORD 7.1: A complete list of codes and algorithms used to classify exposures, outcomes, confounders, and effect modifiers should be provided. If these cannot be reported, an explanation should be provided.</p>                                                                                                                                                                                                                                                                                                                                                                                                                                                                               | <p>-</p>                        |
| <p>35<br/>36<br/>37<br/>38<br/>39<br/>40<br/>41<br/>42</p> <p>Data sources/<br/>measurement</p>                                                                                                            | <p>8</p> | <p>For each variable of interest, give sources of data and details of methods of assessment (measurement). Describe comparability of assessment methods if there is more than one group</p>                                                                                                                                                                                                                                                                                                                                                                                                                                                                                                                            |  |                                                                                                                                                                                                                                                                                                                                                                                                                                                                                                                                                                                                                                                                                                      | <p>Page 5-6</p>                 |

|                                                                                                                                              |                                  |    |                                                                                                                                                                                                                                                                                                                                                                                                                                                                                                                                                                      |                                                                                                                                                       |          |
|----------------------------------------------------------------------------------------------------------------------------------------------|----------------------------------|----|----------------------------------------------------------------------------------------------------------------------------------------------------------------------------------------------------------------------------------------------------------------------------------------------------------------------------------------------------------------------------------------------------------------------------------------------------------------------------------------------------------------------------------------------------------------------|-------------------------------------------------------------------------------------------------------------------------------------------------------|----------|
| 1<br>2<br>3<br>4<br>5<br>6<br>7<br>8<br>9<br>10                                                                                              | Bias                             | 9  | Describe any efforts to address potential sources of bias                                                                                                                                                                                                                                                                                                                                                                                                                                                                                                            |                                                                                                                                                       | Page 6   |
| 11<br>12<br>13<br>14<br>15<br>16<br>17<br>18<br>19<br>20<br>21<br>22<br>23<br>24<br>25<br>26<br>27<br>28<br>29<br>30<br>31<br>32<br>33<br>34 | Study size                       | 10 | Explain how the study size was arrived at                                                                                                                                                                                                                                                                                                                                                                                                                                                                                                                            |                                                                                                                                                       | Page 5   |
| 35<br>36<br>37<br>38<br>39<br>40<br>41<br>42<br>43<br>44                                                                                     | Quantitative variables           | 11 | Explain how quantitative variables were handled in the analyses. If applicable, describe which groupings were chosen, and why                                                                                                                                                                                                                                                                                                                                                                                                                                        |                                                                                                                                                       | Page 5-6 |
|                                                                                                                                              | Statistical methods              | 12 | (a) Describe all statistical methods, including those used to control for confounding<br>(b) Describe any methods used to examine subgroups and interactions<br>(c) Explain how missing data were addressed<br>(d) <i>Cohort study</i> - If applicable, explain how loss to follow-up was addressed<br><i>Case-control study</i> - If applicable, explain how matching of cases and controls was addressed<br><i>Cross-sectional study</i> - If applicable, describe analytical methods taking account of sampling strategy<br>(e) Describe any sensitivity analyses |                                                                                                                                                       | Page 6   |
|                                                                                                                                              | Data access and cleaning methods |    | ..                                                                                                                                                                                                                                                                                                                                                                                                                                                                                                                                                                   | RECORD 12.1: Authors should describe the extent to which the investigators had access to the database population used to create the study population. | Page 5-6 |

|                  |    |                                                                                                                                                                                                                                                                                                                                                 |  |                                                                                                                                                                                                                                                                                                                    |                       |
|------------------|----|-------------------------------------------------------------------------------------------------------------------------------------------------------------------------------------------------------------------------------------------------------------------------------------------------------------------------------------------------|--|--------------------------------------------------------------------------------------------------------------------------------------------------------------------------------------------------------------------------------------------------------------------------------------------------------------------|-----------------------|
|                  |    |                                                                                                                                                                                                                                                                                                                                                 |  | RECORD 12.2: Authors should provide information on the data cleaning methods used in the study.                                                                                                                                                                                                                    | Page 5-6              |
| Linkage          |    | ..                                                                                                                                                                                                                                                                                                                                              |  | RECORD 12.3: State whether the study included person-level, institutional-level, or other data linkage across two or more databases. The methods of linkage and methods of linkage quality evaluation should be provided.                                                                                          | -                     |
| <b>Results</b>   |    |                                                                                                                                                                                                                                                                                                                                                 |  |                                                                                                                                                                                                                                                                                                                    |                       |
| Participants     | 13 | (a) Report the numbers of individuals at each stage of the study ( <i>e.g.</i> , numbers potentially eligible, examined for eligibility, confirmed eligible, included in the study, completing follow-up, and analysed)<br>(b) Give reasons for non-participation at each stage.<br>(c) Consider use of a flow diagram                          |  | RECORD 13.1: Describe in detail the selection of the persons included in the study ( <i>i.e.</i> , study population selection) including filtering based on data quality, data availability and linkage. The selection of included persons can be described in the text and/or by means of the study flow diagram. | Page 7-15 incl tables |
| Descriptive data | 14 | (a) Give characteristics of study participants ( <i>e.g.</i> , demographic, clinical, social) and information on exposures and potential confounders<br>(b) Indicate the number of participants with missing data for each variable of interest<br>(c) <i>Cohort study</i> - summarise follow-up time ( <i>e.g.</i> , average and total amount) |  |                                                                                                                                                                                                                                                                                                                    | Page 7-15 incl tables |
| Outcome data     | 15 | <i>Cohort study</i> - Report numbers of outcome events or summary measures over time<br><i>Case-control study</i> - Report numbers in each exposure                                                                                                                                                                                             |  |                                                                                                                                                                                                                                                                                                                    | -                     |

1  
2  
3  
4  
5  
6  
7  
8  
9  
10  
11  
12  
13  
14  
15  
16  
17  
18  
19  
20  
21  
22  
23  
24  
25  
26  
27  
28  
29  
30  
31  
32  
33  
34  
35  
36  
37  
38  
39  
40  
41  
42  
43  
44  
45  
46  
47

|                   |    |                                                                                                                                                                                                                                                                                                                                                                                                                 |  |                                                                                                                                                                                                                                                                                                          |                       |
|-------------------|----|-----------------------------------------------------------------------------------------------------------------------------------------------------------------------------------------------------------------------------------------------------------------------------------------------------------------------------------------------------------------------------------------------------------------|--|----------------------------------------------------------------------------------------------------------------------------------------------------------------------------------------------------------------------------------------------------------------------------------------------------------|-----------------------|
|                   |    | category, or summary measures of exposure<br><i>Cross-sectional study</i> - Report numbers of outcome events or summary measures                                                                                                                                                                                                                                                                                |  |                                                                                                                                                                                                                                                                                                          |                       |
| Main results      | 16 | (a) Give unadjusted estimates and, if applicable, confounder-adjusted estimates and their precision (e.g., 95% confidence interval). Make clear which confounders were adjusted for and why they were included<br>(b) Report category boundaries when continuous variables were categorized<br>(c) If relevant, consider translating estimates of relative risk into absolute risk for a meaningful time period |  |                                                                                                                                                                                                                                                                                                          | Page 7-15 incl tables |
| Other analyses    | 17 | Report other analyses done— e.g., analyses of subgroups and interactions, and sensitivity analyses                                                                                                                                                                                                                                                                                                              |  |                                                                                                                                                                                                                                                                                                          | Page 7-15 incl tables |
| <b>Discussion</b> |    |                                                                                                                                                                                                                                                                                                                                                                                                                 |  |                                                                                                                                                                                                                                                                                                          |                       |
| Key results       | 18 | Summarise key results with reference to study objectives                                                                                                                                                                                                                                                                                                                                                        |  |                                                                                                                                                                                                                                                                                                          | Page 15-17            |
| Limitations       | 19 | Discuss limitations of the study, taking into account sources of potential bias or imprecision. Discuss both direction and magnitude of any potential bias                                                                                                                                                                                                                                                      |  | RECORD 19.1: Discuss the implications of using data that were not created or collected to answer the specific research question(s). Include discussion of misclassification bias, unmeasured confounding, missing data, and changing eligibility over time, as they pertain to the study being reported. | Page 17-18            |
| Interpretation    | 20 | Give a cautious overall interpretation of results considering objectives,                                                                                                                                                                                                                                                                                                                                       |  |                                                                                                                                                                                                                                                                                                          | Page 15-17            |

|                                                           |    |                                                                                                                                                               |  |                                                                                                                                                          |         |
|-----------------------------------------------------------|----|---------------------------------------------------------------------------------------------------------------------------------------------------------------|--|----------------------------------------------------------------------------------------------------------------------------------------------------------|---------|
|                                                           |    | limitations, multiplicity of analyses, results from similar studies, and other relevant evidence                                                              |  |                                                                                                                                                          |         |
| Generalisability                                          | 21 | Discuss the generalisability (external validity) of the study results                                                                                         |  |                                                                                                                                                          | Page 18 |
| <b>Other Information</b>                                  |    |                                                                                                                                                               |  |                                                                                                                                                          |         |
| Funding                                                   | 22 | Give the source of funding and the role of the funders for the present study and, if applicable, for the original study on which the present article is based |  |                                                                                                                                                          | Page 19 |
| Accessibility of protocol, raw data, and programming code |    | ..                                                                                                                                                            |  | RECORD 22.1: Authors should provide information on how to access any supplemental information such as the study protocol, raw data, or programming code. | Page 19 |

\*Reference: Benchimol EI, Smeeth L, Guttman A, Harron K, Moher D, Petersen I, Sørensen HT, von Elm E, Langan SM, the RECORD Working Committee. The REporting of studies Conducted using Observational Routinely-collected health Data (RECORD) Statement. *PLoS Medicine* 2015; in press.

\*Checklist is protected under Creative Commons Attribution ([CC BY](https://creativecommons.org/licenses/by/4.0/)) license.
